# Supplementary material for: Highly active NHC–Pd(ii) complexes for cross coupling of aryl chlorides and arylboronic acids: an investigation of the effect of remote bulky groups
Source: Royal Society of Chemistry journal article supplement (doi:10.1039/c8nj01047a), 2018-01-01
Supplement: c8nj01047a1.pdf [file c8nj01047a1.pdf]

# Supporting Information

## Highly Active NHC-Pd (II) Complexes for Cross Coupling of Aryl Chlorides and Arylboronic Acids: An Investigation of the Remote Bulky Group Effect

*Fangwai Han,<sup>†</sup> Ying Xu,<sup>†</sup> Rongjiao Zhu,<sup>‡</sup> Guiyan Liu,<sup>\*,†</sup> Chen Chen<sup>\*,†</sup> and Jianhui  
Wang<sup>\*,‡</sup>*

<sup>†</sup>Tianjin Key Laboratory of Structure and Performance for Functional Molecules; Key  
Laboratory of Inorgan-ic-Organic hybrid Functional Material Chemistry (Tianjin  
Normal University); Ministry of Education; College of Chemistry, Tianjin Normal  
University, Tianjin, 300387, P. R. China

<sup>‡</sup>Department of Chemistry, College of Science, Tianjin University, Tianjin 300350, P.  
R. China.

**Content:**

|                                                   |       |
|---------------------------------------------------|-------|
| 1. Copy of Spectroscopy.....                      | 3-8   |
| 2. X-Ray Crystal Structure of Complexes 4 -7..... | 9-105 |

# 1. Copy of Spectroscopy

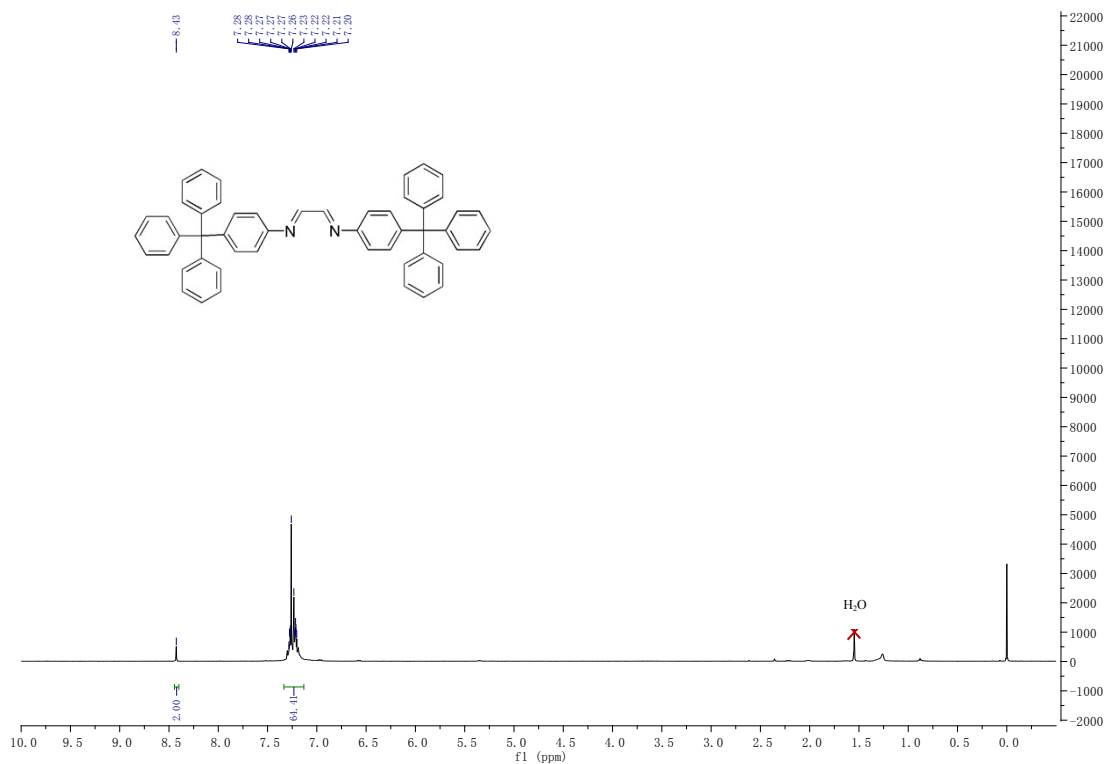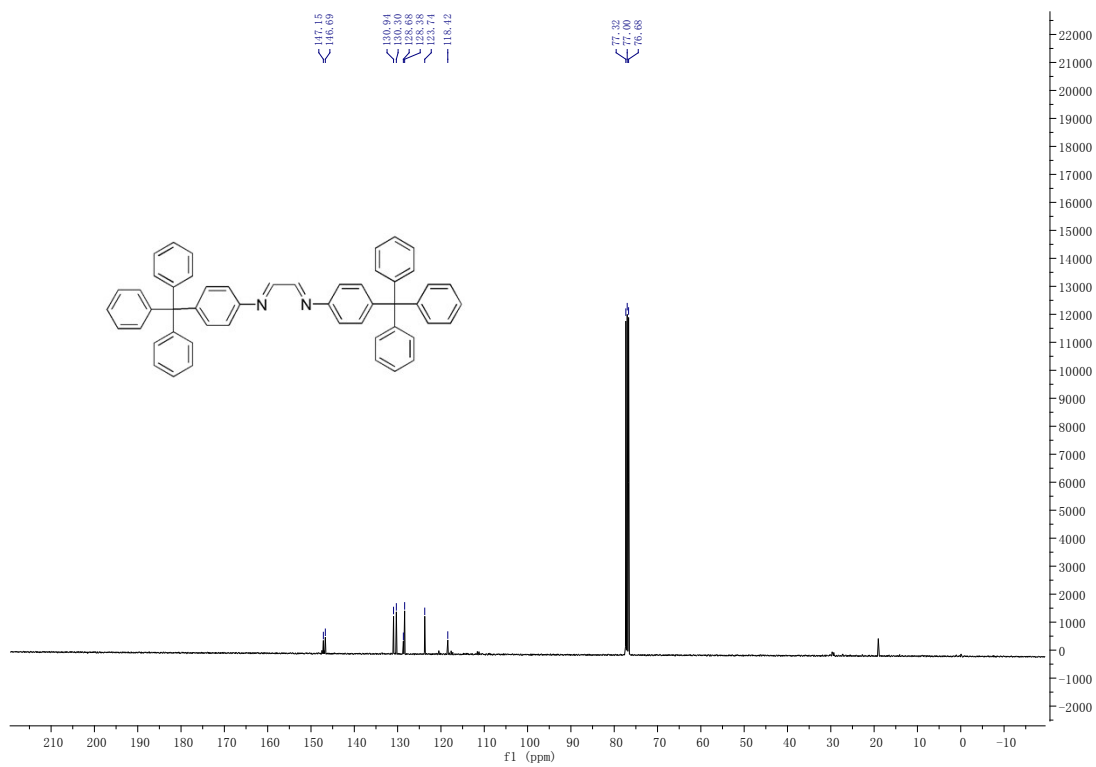

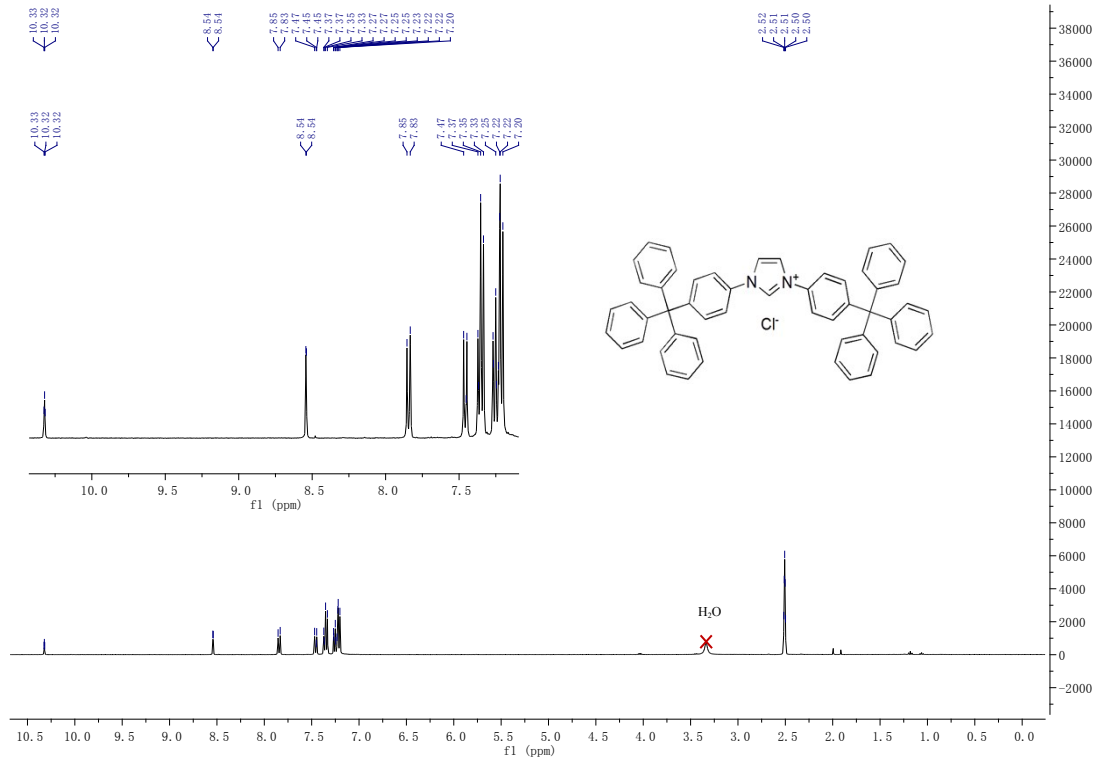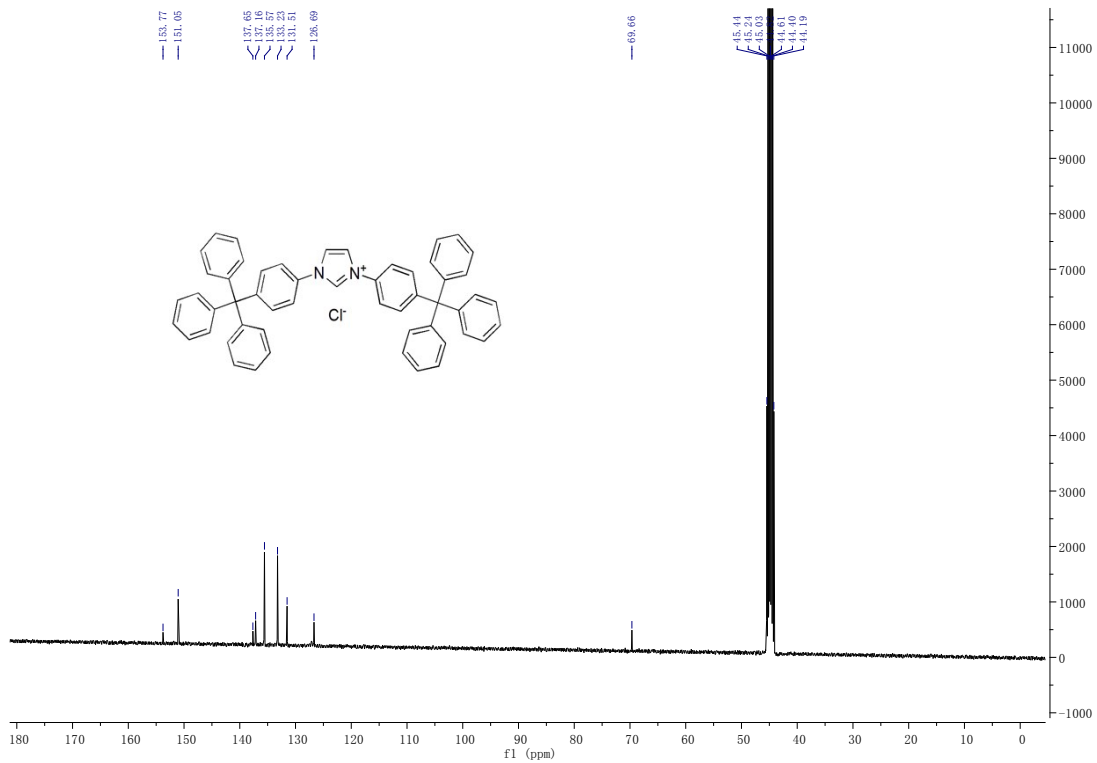

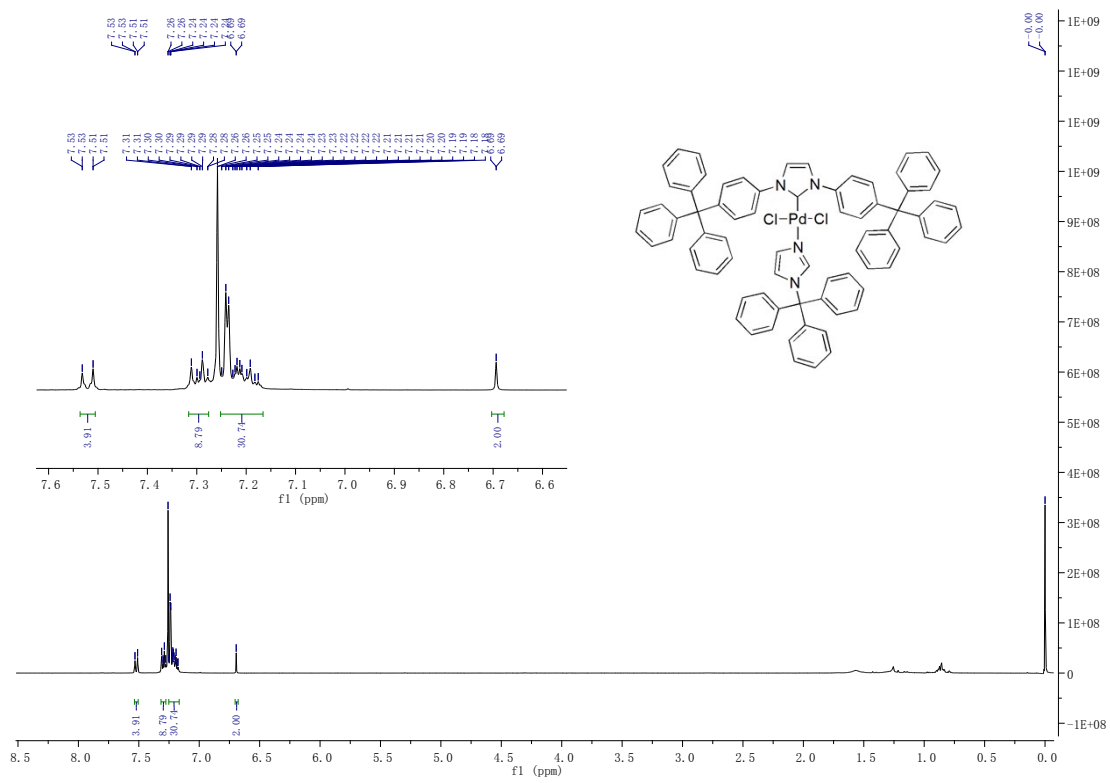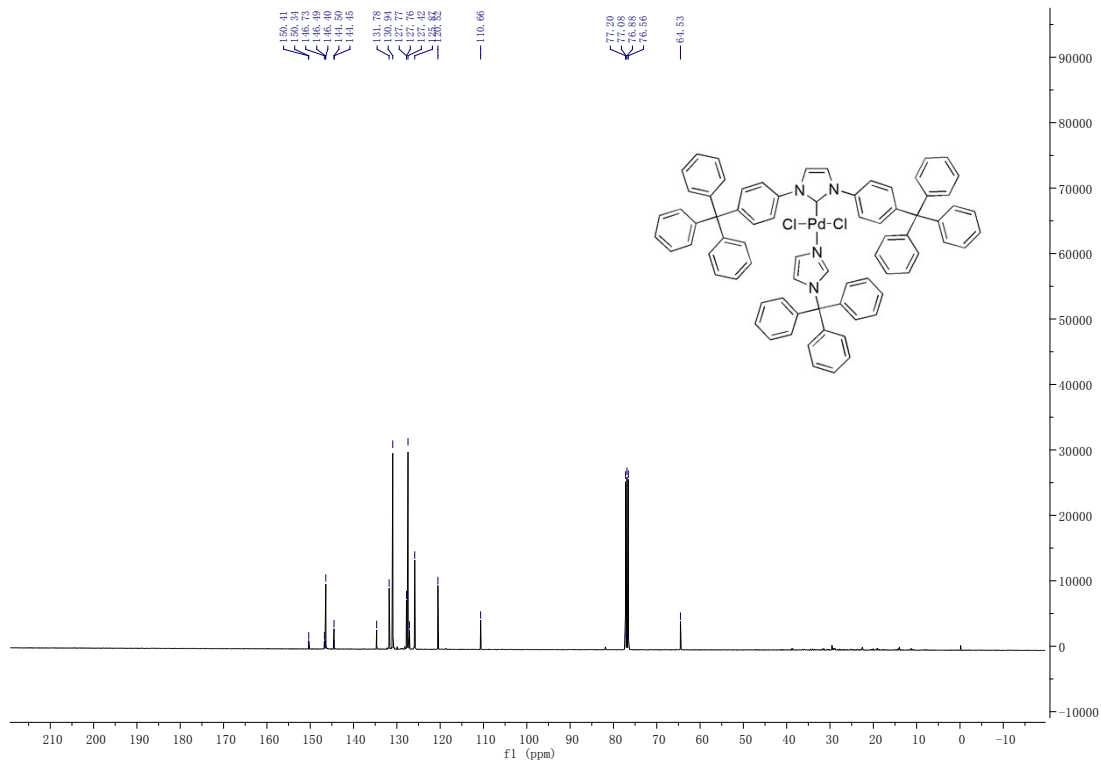

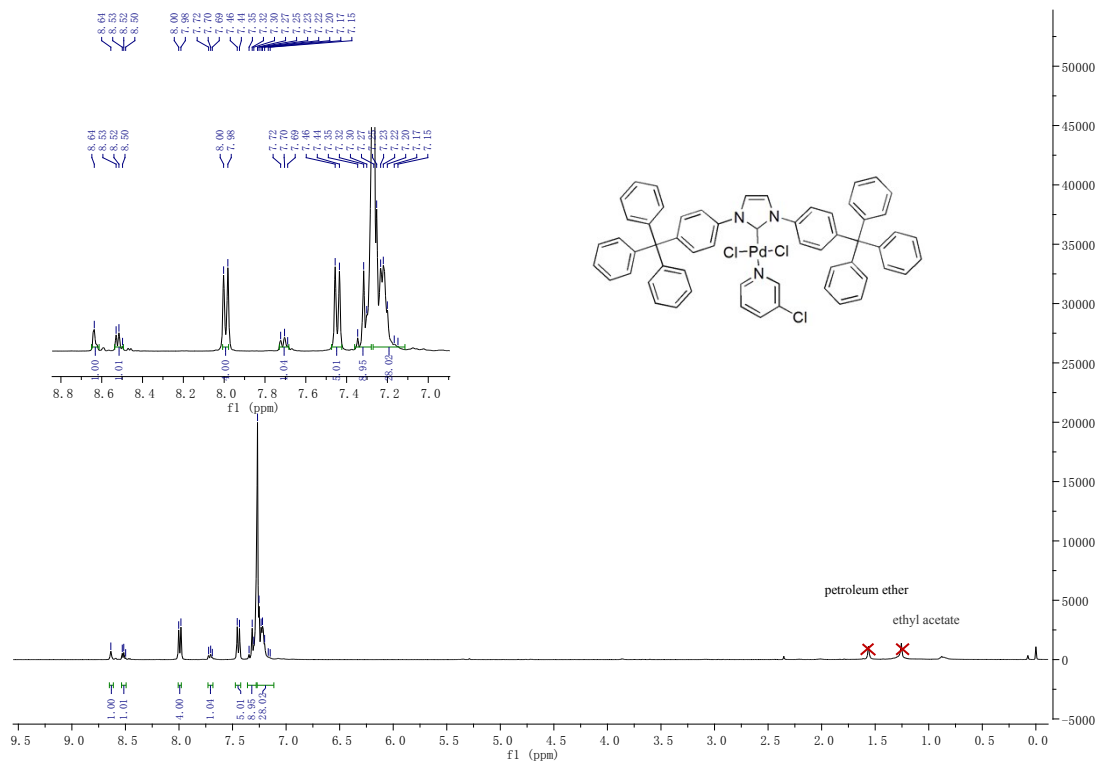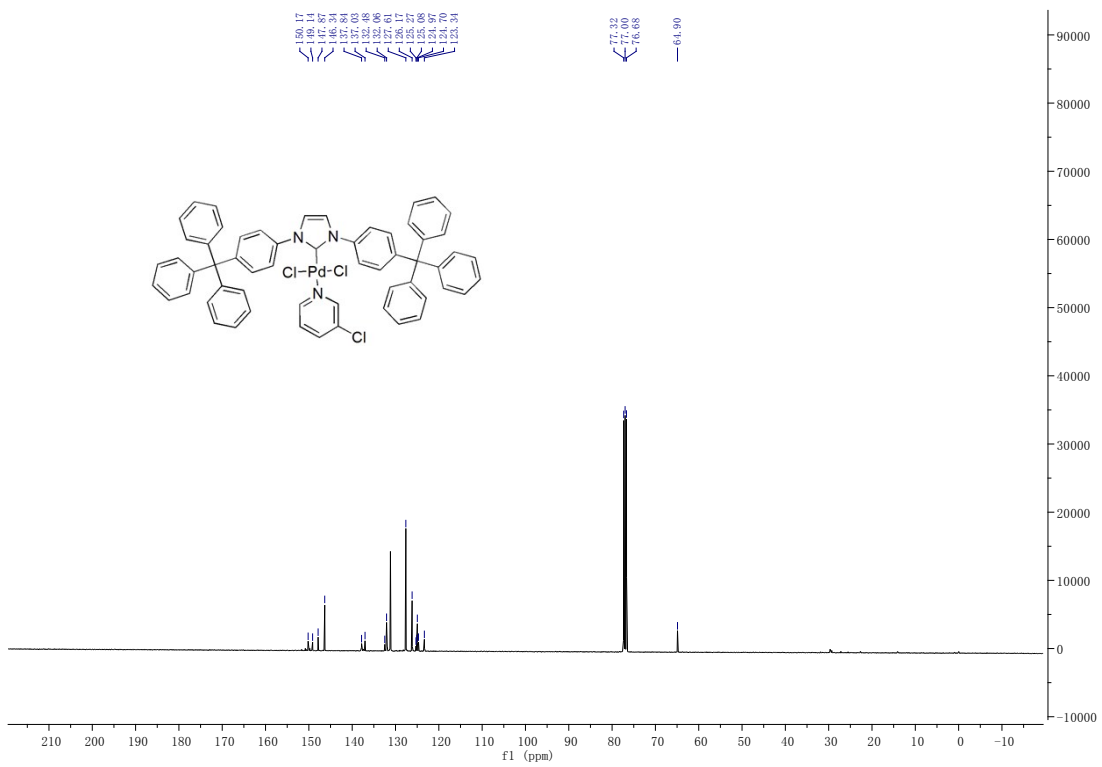

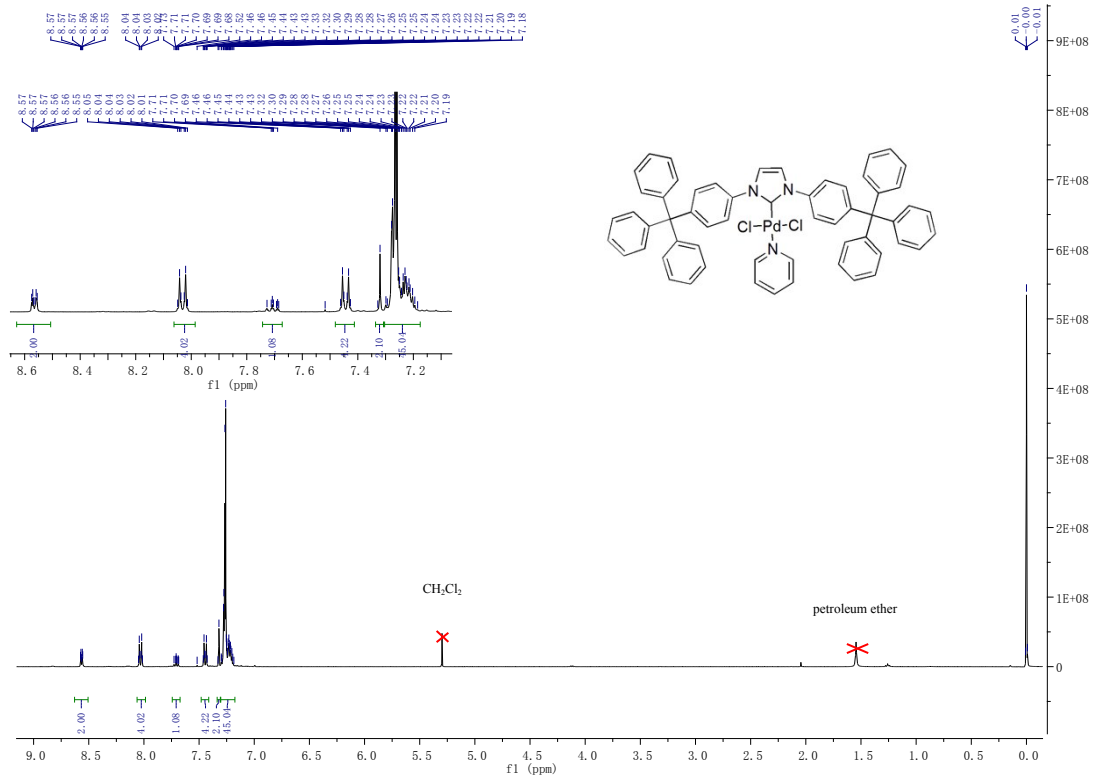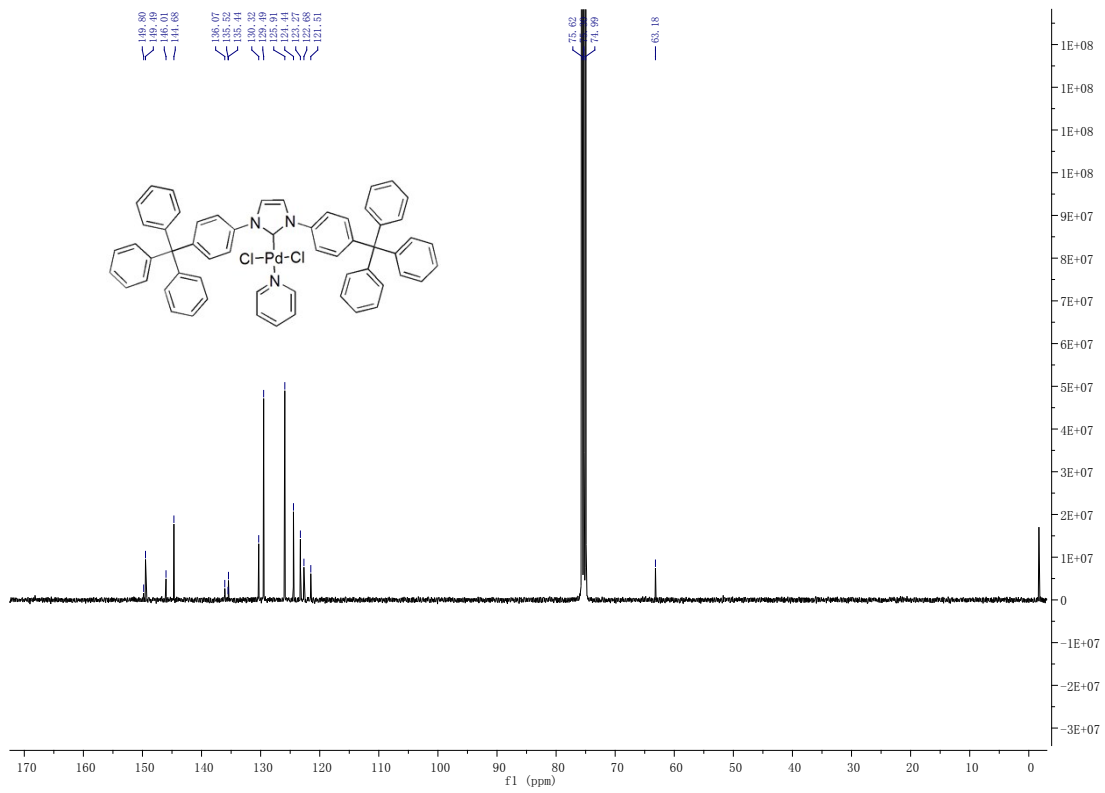

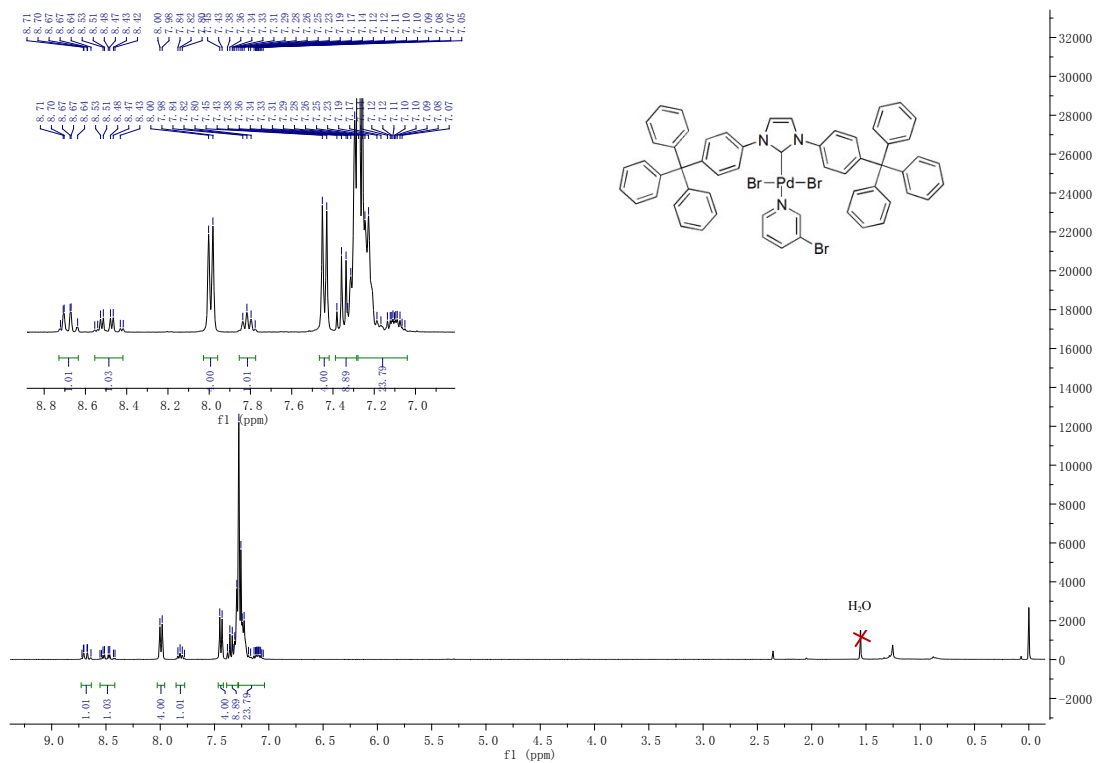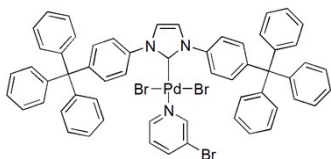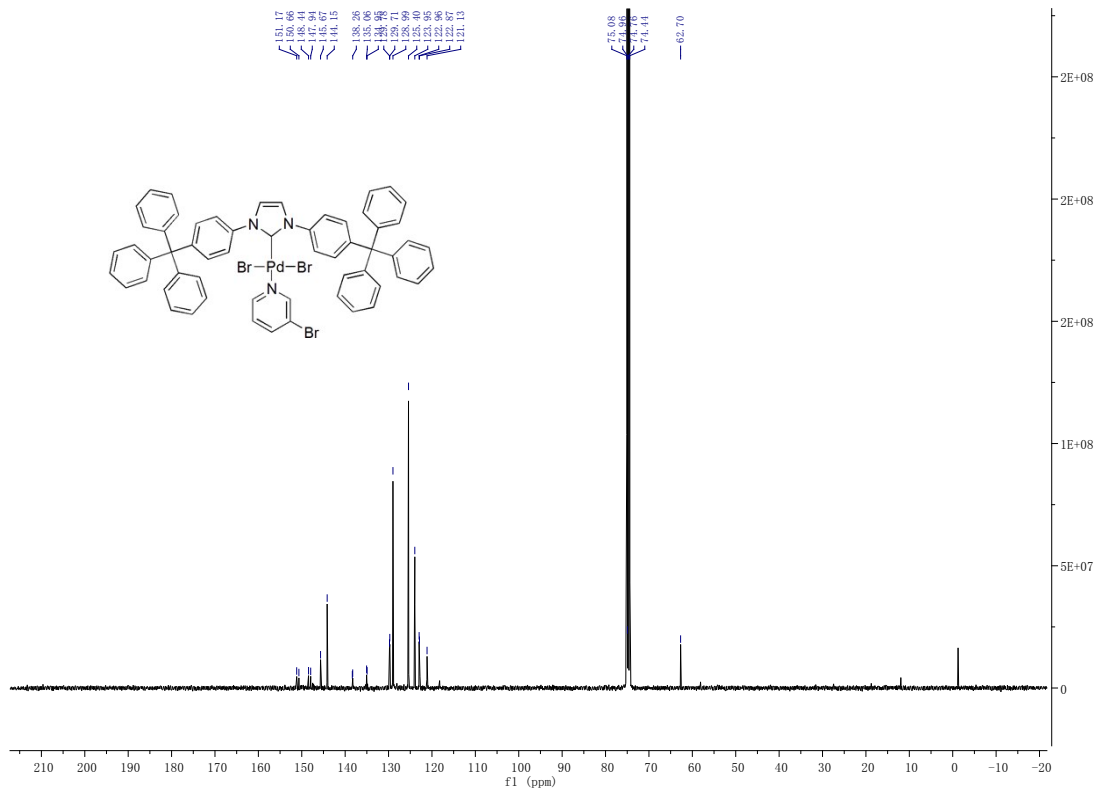



## 2. X-Ray Crystal Structure of Complexes 4-7

**Table S1.** Crystal data and structure refinement for Complex **4**

|                                             |                                          |
|---------------------------------------------|------------------------------------------|
| Empirical formula                           | <b>4</b>                                 |
| Formula weight                              | 1362.40                                  |
| Temperature/K                               | 173(2)                                   |
| Crystal system                              | Triclinic                                |
| Space group                                 | P -1                                     |
| a/Å                                         | 11.0025(8)                               |
| b/Å                                         | 17.0704(12)                              |
| c/Å                                         | 18.8271(13)                              |
| $\alpha$ /°                                 | 67.6860(10)                              |
| $\beta$ /°                                  | 87.6640(10)                              |
| $\gamma$ /°                                 | 87.070(2)                                |
| Volume/Å <sup>3</sup>                       | 2073.17(7)                               |
| Z                                           | 2                                        |
| $\rho_{\text{calc}}/\text{cm}^3$            | 1.385                                    |
| $\mu/\text{mm}^{-1}$                        | 0.577                                    |
| F(000)                                      | 1400                                     |
| Crystal size/mm <sup>3</sup>                | 0.18 × 0.14 × 0.13                       |
| Radiation                                   | CuK $\alpha$ ( $\lambda$ = 1.54184)      |
| 2 $\theta$ range for data collection/°      | 1.375 to 28.361                          |
| Index ranges                                | -12 ≤ h ≤ 14, -19 ≤ k ≤ 22, -25 ≤ l ≤ 23 |
| Reflections collected                       | 24592                                    |
| Independent reflections                     | 16228 [ $R_{\text{int}}$ = 0.0334]       |
| Data/restraints/parameters                  | 16228 / 6 / 793                          |
| Goodness-of-fit on F <sup>2</sup>           | 1.040                                    |
| Final R indexes [ $I \geq 2\sigma(I)$ ]     | $R_1 = 0.0479$ , $wR_2 = 0.0968$         |
| Final R indexes [all data]                  | $R_1 = 0.0716$ , $wR_2 = 0.1081$         |
| Largest diff. peak/hole / e Å <sup>-3</sup> | 0.79/-0.83                               |

**Table S2.** Fractional Atomic Coordinates ( $\times 10^4$ ) and Equivalent Isotropic Displacement Parameters ( $\text{\AA}^2 \times 10^3$ ) for Complex 4.  $U_{\text{eq}}$  is defined as 1/3 of the trace of the orthogonalised  $U_{ij}$  tensor.

| Atom | x        | Y       | z       | U(eq)  |
|------|----------|---------|---------|--------|
| Pd1  | -356(1)  | 2827(1) | 1886(1) | 11(1)  |
| Cl1  | -1526(1) | 1979(1) | 1510(1) | 19(1)  |
| Cl2  | 771(1)   | 3748(1) | 2219(1) | 20(1)  |
| Cl3  | 1927(1)  | 5894(1) | 2167(1) | 59(1)  |
| Cl4  | 74(1)    | 6893(1) | 2624(1) | 105(1) |
| Cl5  | 4735(1)  | 3439(1) | 917(1)  | 44(1)  |
| Cl6  | 4349(1)  | 4995(1) | 1201(1) | 37(1)  |
| N3   | 235(2)   | 1782(1) | 2829(1) | 14(1)  |
| N4   | 1480(2)  | 879(1)  | 3671(1) | 14(1)  |
| N1   | -1763(2) | 4371(1) | 866(1)  | 11(1)  |
| N2   | -561(2)  | 3837(1) | 223(1)  | 13(1)  |
| C23  | 1301(3)  | 1682(2) | 3157(2) | 15(1)  |
| C2   | -300(3)  | 1010(2) | 3152(2) | 16(1)  |
| C3   | 455(3)   | 449(2)  | 3674(2) | 14(1)  |
| C4   | 2550(2)  | 575(2)  | 4192(2) | 13(1)  |
| C5   | 2295(3)  | 817(2)  | 4899(2) | 15(1)  |
| C6   | 1365(3)  | 1377(2) | 4929(2) | 16(1)  |
| C7   | 1152(3)  | 1559(2) | 5590(2) | 21(1)  |
| C8   | 1875(3)  | 1182(2) | 6222(2) | 25(1)  |
| C9   | 2820(3)  | 619(2)  | 6192(2) | 25(1)  |
| C10  | 3033(3)  | 435(2)  | 5542(2) | 22(1)  |
| C11  | 3672(3)  | 1002(2) | 3713(2) | 15(1)  |
| C12  | 4519(3)  | 1394(2) | 3983(2) | 21(1)  |
| C13  | 5555(3)  | 1732(2) | 3540(2) | 28(1)  |

|     |          |          |          |       |
|-----|----------|----------|----------|-------|
| C14 | 5752(3)  | 1694(2)  | 2831(2)  | 30(1) |
| C15 | 4894(3)  | 1325(2)  | 2542(2)  | 27(1) |
| C16 | 3870(3)  | 992(2)   | 2970(2)  | 21(1) |
| C17 | 2661(3)  | -404(2)  | 4463(2)  | 14(1) |
| C18 | 1848(3)  | -897(2)  | 5031(2)  | 17(1) |
| C19 | 1874(3)  | -1773(2) | 5268(2)  | 20(1) |
| C20 | 2708(3)  | -2177(2) | 4944(2)  | 24(1) |
| C21 | 3547(3)  | -1704(2) | 4399(2)  | 25(1) |
| C22 | 3522(3)  | -822(2)  | 4160(2)  | 19(1) |
| C1  | -907(2)  | 3751(2)  | 946(2)   | 12(1) |
| C24 | -1969(3) | 4840(2)  | 92(2)    | 16(1) |
| C25 | -1223(3) | 4508(2)  | -311(2)  | 17(1) |
| C26 | 322(2)   | 3273(2)  | 69(2)    | 13(1) |
| C27 | 1387(2)  | 3062(2)  | 485(2)   | 13(1) |
| C28 | 2184(2)  | 2446(2)  | 411(2)   | 14(1) |
| C29 | 1927(2)  | 2010(2)  | -67(2)   | 14(1) |
| C30 | 901(3)   | 2273(2)  | -515(2)  | 16(1) |
| C31 | 87(3)    | 2900(2)  | -445(2)  | 16(1) |
| C32 | 2818(2)  | 1264(2)  | -36(2)   | 13(1) |
| C33 | 2543(3)  | 900(2)   | -648(2)  | 15(1) |
| C34 | 1446(3)  | 498(2)   | -594(2)  | 22(1) |
| C35 | 1181(3)  | 118(2)   | -1097(2) | 28(1) |
| C36 | 2026(3)  | 115(2)   | -1668(2) | 26(1) |
| C37 | 3109(3)  | 488(2)   | -1719(2) | 23(1) |
| C38 | 3374(3)  | 885(2)   | -1215(2) | 17(1) |
| C39 | 2669(2)  | 522(2)   | 754(2)   | 14(1) |
| C40 | 1928(3)  | 561(2)   | 1357(2)  | 17(1) |
| C41 | 1827(3)  | -138(2)  | 2045(2)  | 24(1) |
| C42 | 2442(3)  | -899(2)  | 2140(2)  | 26(1) |

|     |          |         |         |       |
|-----|----------|---------|---------|-------|
| C43 | 3169(3)  | -956(2) | 1540(2) | 27(1) |
| C44 | 3284(3)  | -258(2) | 862(2)  | 21(1) |
| C45 | 4097(3)  | 1632(2) | -157(2) | 14(1) |
| C46 | 5018(3)  | 1321(2) | 375(2)  | 18(1) |
| C47 | 6120(3)  | 1727(2) | 259(2)  | 26(1) |
| C48 | 6317(3)  | 2449(2) | -389(2) | 30(1) |
| C49 | 5412(3)  | 2760(2) | -927(2) | 25(1) |
| C50 | 4317(3)  | 2356(2) | -811(2) | 19(1) |
| C51 | -2353(2) | 4528(2) | 1498(2) | 12(1) |
| C52 | -2774(3) | 3853(2) | 2121(2) | 16(1) |
| C53 | -3250(3) | 3992(2) | 2754(2) | 16(1) |
| C54 | -3330(2) | 4810(2) | 2775(2) | 13(1) |
| C55 | -2957(2) | 5478(2) | 2124(2) | 14(1) |
| C56 | -2455(3) | 5348(2) | 1482(2) | 14(1) |
| C57 | -3756(2) | 4902(2) | 3534(2) | 13(1) |
| C58 | -4104(3) | 5841(2) | 3386(1) | 14(1) |
| C59 | -5308(3) | 6150(2) | 3344(2) | 19(1) |
| C60 | -5582(3) | 7013(2) | 3148(2) | 27(1) |
| C61 | -4658(3) | 7581(2) | 2988(2) | 26(1) |
| C62 | -3457(3) | 7285(2) | 3039(2) | 24(1) |
| C63 | -3187(3) | 6422(2) | 3249(2) | 20(1) |
| C64 | -2684(3) | 4619(2) | 4097(2) | 15(1) |
| C65 | -2789(3) | 4747(2) | 4794(2) | 20(1) |
| C66 | -1863(3) | 4489(2) | 5318(2) | 27(1) |
| C67 | -798(3)  | 4115(2) | 5168(2) | 31(1) |
| C68 | -655(3)  | 4007(2) | 4476(2) | 26(1) |
| C69 | -1592(3) | 4257(2) | 3946(2) | 19(1) |
| C70 | -4871(3) | 4341(2) | 3848(2) | 13(1) |
| C71 | -5782(3) | 4379(2) | 3335(2) | 18(1) |

|     |          |         |         |       |
|-----|----------|---------|---------|-------|
| C72 | -6810(3) | 3896(2) | 3572(2) | 23(1) |
| C73 | -6949(3) | 3357(2) | 4333(2) | 24(1) |
| C74 | -6064(3) | 3311(2) | 4847(2) | 24(1) |
| C75 | -5039(3) | 3796(2) | 4608(2) | 18(1) |
| C76 | 472(5)   | 5898(4) | 2548(3) | 73(2) |
| C77 | 4145(3)  | 3886(2) | 1571(2) | 36(1) |

**Table S3.** Anisotropic Displacement Parameters ( $\text{\AA}^2 \times 10^3$ ) for Complex **4**. The Anisotropic displacement factor exponent takes the form:  $-2\pi^2[h^2a^*2U_{11}+2hka^*b^*U_{12}+\dots]$ .

| Atom | U11   | U22    | U33   | U23    | U13    | U12    |
|------|-------|--------|-------|--------|--------|--------|
| Pd1  | 13(1) | 11(1)  | 9(1)  | -3(1)  | -1(1)  | 0(1)   |
| Cl1  | 24(1) | 17(1)  | 16(1) | -5(1)  | -5(1)  | -7(1)  |
| Cl2  | 25(1) | 16(1)  | 19(1) | -5(1)  | -9(1)  | -4(1)  |
| Cl3  | 44(1) | 60(1)  | 54(1) | 4(1)   | -21(1) | -8(1)  |
| Cl4  | 63(1) | 192(2) | 52(1) | -40(1) | 7(1)   | 10(1)  |
| Cl5  | 60(1) | 39(1)  | 39(1) | -20(1) | -2(1)  | -10(1) |
| Cl6  | 39(1) | 39(1)  | 37(1) | -18(1) | -14(1) | 4(1)   |
| N3   | 17(1) | 13(1)  | 10(1) | -2(1)  | -1(1)  | 0(1)   |
| N4   | 16(1) | 13(1)  | 12(1) | -3(1)  | -1(1)  | -1(1)  |
| N1   | 13(1) | 9(1)   | 10(1) | -2(1)  | 0(1)   | 0(1)   |
| N2   | 13(1) | 15(1)  | 11(1) | -5(1)  | 0(1)   | 2(1)   |
| C2   | 18(1) | 11(1)  | 12(1) | -2(1)  | -2(1)  | -2(1)  |
| C2   | 16(1) | 17(1)  | 14(1) | -4(1)  | 0(1)   | -5(1)  |
| C3   | 16(1) | 14(1)  | 10(1) | -2(1)  | 1(1)   | -3(1)  |
| C4   | 13(1) | 12(1)  | 13(1) | -3(1)  | -3(1)  | 0(1)   |
| C5   | 20(2) | 13(1)  | 12(1) | -4(1)  | 0(1)   | -4(1)  |
| C6   | 19(2) | 14(1)  | 16(1) | -5(1)  | -1(1)  | -1(1)  |
| C7   | 23(2) | 15(1)  | 25(2) | -9(1)  | 6(1)   | -4(1)  |

|     |       |       |       |        |       |        |
|-----|-------|-------|-------|--------|-------|--------|
| C8  | 37(2) | 25(2) | 16(2) | -12(1) | 1(1)  | -7(2)  |
| C9  | 35(2) | 26(2) | 15(2) | -7(1)  | -8(1) | -2(1)  |
| C10 | 28(2) | 21(2) | 17(2) | -7(1)  | -7(1) | 3(1)   |
| C11 | 14(1) | 12(1) | 16(1) | -1(1)  | -2(1) | 2(1)   |
| C12 | 20(2) | 15(1) | 25(2) | -4(1)  | -4(1) | 0(1)   |
| C13 | 17(2) | 17(2) | 41(2) | -1(2)  | -6(2) | -3(1)  |
| C14 | 19(2) | 17(2) | 42(2) | 3(2)   | 11(2) | -5(1)  |
| C15 | 27(2) | 21(2) | 27(2) | -4(1)  | 12(1) | 0(1)   |
| C16 | 21(2) | 20(2) | 20(2) | -4(1)  | 0(1)  | -2(1)  |
| C17 | 15(1) | 14(1) | 12(1) | -4(1)  | -3(1) | 0(1)   |
| C18 | 17(1) | 16(1) | 15(1) | -4(1)  | -1(1) | 4(1)   |
| C19 | 18(2) | 15(1) | 21(2) | 0(1)   | -1(1) | -2(1)  |
| C20 | 29(2) | 9(1)  | 28(2) | -2(1)  | -4(1) | 2(1)   |
| C21 | 31(2) | 20(2) | 24(2) | -11(1) | 4(1)  | 6(1)   |
| C22 | 21(2) | 16(1) | 15(1) | -1(1)  | 2(1)  | 2(1)   |
| C11 | 12(1) | 13(1) | 12(1) | -5(1)  | -1(1) | -1(1)  |
| C24 | 22(2) | 12(1) | 11(1) | -2(1)  | -5(1) | 4(1)   |
| C25 | 20(2) | 18(1) | 9(1)  | -2(1)  | -5(1) | 5(1)   |
| C26 | 14(1) | 12(1) | 10(1) | -3(1)  | 3(1)  | 0(1)   |
| C27 | 14(1) | 15(1) | 10(1) | -6(1)  | 1(1)  | -1(1)  |
| C28 | 12(1) | 16(1) | 13(1) | -6(1)  | -2(1) | 0(1)   |
| C29 | 11(1) | 17(1) | 13(1) | -7(1)  | 3(1)  | -1(1)  |
| C30 | 17(1) | 24(2) | 13(1) | -12(1) | -1(1) | 0(1)   |
| C31 | 13(1) | 22(2) | 14(1) | -7(1)  | -3(1) | 4(1)   |
| C32 | 14(1) | 15(1) | 13(1) | -7(1)  | 2(1)  | 0(1)   |
| C33 | 21(2) | 11(1) | 13(1) | -6(1)  | -2(1) | 1(1)   |
| C34 | 24(2) | 27(2) | 20(2) | -13(1) | 6(1)  | -9(1)  |
| C35 | 32(2) | 32(2) | 25(2) | -14(2) | -1(1) | -15(2) |
| C36 | 49(2) | 18(2) | 16(2) | -10(1) | -5(1) | -6(2)  |

|     |       |       |       |        |       |       |
|-----|-------|-------|-------|--------|-------|-------|
| C37 | 36(2) | 23(2) | 13(1) | -10(1) | 1(1)  | 3(1)  |
| C38 | 23(2) | 14(1) | 14(1) | -6(1)  | 2(1)  | -1(1) |
| C39 | 11(1) | 20(2) | 14(1) | -8(1)  | -3(1) | 1(1)  |
| C40 | 18(2) | 19(2) | 16(1) | -8(1)  | -2(1) | 1(1)  |
| C41 | 26(2) | 28(2) | 17(2) | -10(1) | 5(1)  | 0(1)  |
| C42 | 31(2) | 23(2) | 18(2) | -2(1)  | 1(1)  | -2(1) |
| C43 | 31(2) | 18(2) | 27(2) | -5(1)  | -3(1) | 7(1)  |
| C44 | 22(2) | 23(2) | 19(2) | -9(1)  | 3(1)  | 1(1)  |
| C45 | 14(1) | 16(1) | 16(1) | -10(1) | 1(1)  | 1(1)  |
| C46 | 16(2) | 23(2) | 18(1) | -10(1) | -2(1) | 0(1)  |
| C47 | 17(2) | 34(2) | 32(2) | -18(2) | -5(1) | -2(1) |
| C48 | 16(2) | 33(2) | 47(2) | -22(2) | 4(2)  | -8(1) |
| C49 | 24(2) | 21(2) | 30(2) | -10(1) | 6(1)  | -5(1) |
| C50 | 17(2) | 19(2) | 23(2) | -9(1)  | 1(1)  | -2(1) |
| C51 | 12(1) | 15(1) | 11(1) | -6(1)  | 1(1)  | 1(1)  |
| C52 | 18(2) | 11(1) | 20(1) | -7(1)  | 0(1)  | 1(1)  |
| C53 | 17(1) | 13(1) | 16(1) | -4(1)  | 5(1)  | -5(1) |
| C54 | 10(1) | 15(1) | 15(1) | -6(1)  | -1(1) | 1(1)  |
| C55 | 15(1) | 10(1) | 14(1) | -3(1)  | 0(1)  | 1(1)  |
| C56 | 16(1) | 12(1) | 12(1) | 0(1)   | 1(1)  | 1(1)  |
| C57 | 14(1) | 11(1) | 12(1) | -2(1)  | 2(1)  | -2(1) |
| C58 | 23(2) | 12(1) | 7(1)  | -5(1)  | 1(1)  | 1(1)  |
| C59 | 22(2) | 17(2) | 16(1) | -5(1)  | 4(1)  | 3(1)  |
| C60 | 29(2) | 21(2) | 25(2) | -5(1)  | 2(1)  | 11(1) |
| C61 | 45(2) | 12(2) | 17(2) | -5(1)  | 4(1)  | 9(1)  |
| C62 | 40(2) | 14(2) | 19(2) | -7(1)  | 2(1)  | -7(1) |
| C63 | 27(2) | 18(2) | 18(1) | -9(1)  | -2(1) | 0(1)  |
| C64 | 15(1) | 13(1) | 17(1) | -4(1)  | -1(1) | -3(1) |
| C65 | 20(2) | 21(2) | 19(2) | -8(1)  | -1(1) | -3(1) |

|     |       |        |       |        |        |        |
|-----|-------|--------|-------|--------|--------|--------|
| C66 | 28(2) | 34(2)  | 20(2) | -10(2) | -4(1)  | -6(2)  |
| C67 | 25(2) | 34(2)  | 31(2) | -7(2)  | -12(2) | -3(2)  |
| C68 | 17(2) | 26(2)  | 32(2) | -6(2)  | -4(1)  | 0(1)   |
| C69 | 18(2) | 15(1)  | 24(2) | -8(1)  | 1(1)   | -2(1)  |
| C70 | 16(1) | 12(1)  | 15(1) | -8(1)  | 4(1)   | 1(1)   |
| C71 | 18(2) | 21(2)  | 15(1) | -8(1)  | 1(1)   | 0(1)   |
| C72 | 21(2) | 23(2)  | 26(2) | -12(1) | -3(1)  | 0(1)   |
| C73 | 20(2) | 17(2)  | 34(2) | -8(1)  | 9(1)   | -6(1)  |
| C74 | 28(2) | 17(2)  | 22(2) | -3(1)  | 8(1)   | -2(1)  |
| C75 | 21(2) | 17(1)  | 15(1) | -6(1)  | 0(1)   | 3(1)   |
| C76 | 62(3) | 105(5) | 37(2) | -7(3)  | 8(2)   | -42(3) |
| C77 | 30(2) | 47(2)  | 31(2) | -14(2) | -2(2)  | -10(2) |

**Table S4.** Bond Lengths for Complex 4.

| Atom | Atom | Length/Å  | Atom | Atom | Length/Å |
|------|------|-----------|------|------|----------|
| Pd1  | C1   | 1.965(3)  | C35  | H35  | 0.9500   |
| Pd1  | N3   | 2.080(2)  | C36  | C37  | 1.362(5) |
| Pd1  | C11  | 2.3012(7) | C36  | H36  | 0.9500   |
| Pd1  | C12  | 2.3272(7) | C37  | C38  | 1.405(4) |
| Cl3  | C76  | 1.729(5)  | C37  | H37  | 0.9500   |
| Cl4  | C76  | 1.789(6)  | C38  | H38  | 0.9500   |
| Cl5  | C77  | 1.766(4)  | C39  | C40  | 1.391(4) |
| Cl6  | C77  | 1.774(4)  | C39  | C44  | 1.409(4) |
| N3   | C23  | 1.321(3)  | C40  | C41  | 1.393(4) |
| N3   | C2   | 1.376(4)  | C40  | H40  | 0.9500   |
| N4   | C23  | 1.354(3)  | C41  | C42  | 1.385(4) |
| N4   | C3   | 1.376(4)  | C41  | H41  | 0.9500   |
| N4   | C4   | 1.504(3)  | C42  | C43  | 1.388(4) |



|     |     |          |     |     |          |
|-----|-----|----------|-----|-----|----------|
| N1  | C1  | 1.348(3) | C42 | H42 | 0.9500   |
| N1  | C24 | 1.393(3) | C43 | C44 | 1.384(4) |
| N1  | C51 | 1.439(3) | C43 | H43 | 0.9500   |
| N2  | C1  | 1.353(3) | C44 | H44 | 0.9500   |
| N2  | C25 | 1.397(3) | C45 | C46 | 1.392(4) |
| N2  | C26 | 1.432(3) | C45 | C50 | 1.398(4) |
| C23 | H23 | 0.9500   | C46 | C47 | 1.395(4) |
| C2  | C3  | 1.358(4) | C46 | H46 | 0.9500   |
| C2  | H2  | 0.9500   | C47 | C48 | 1.385(5) |
| C3  | H3  | 0.9500   | C47 | H47 | 0.9500   |
| C4  | C11 | 1.539(4) | C48 | C49 | 1.386(5) |
| C4  | C5  | 1.548(4) | C48 | H48 | 0.9500   |
| C4  | C17 | 1.552(4) | C49 | C50 | 1.387(4) |
| C5  | C6  | 1.379(4) | C49 | H49 | 0.9500   |
| C5  | C10 | 1.405(4) | C50 | H50 | 0.9500   |
| C6  | C7  | 1.400(4) | C51 | C52 | 1.380(4) |
| C6  | H6  | 0.9500   | C51 | C56 | 1.386(4) |
| C7  | C8  | 1.380(4) | C52 | C53 | 1.380(4) |
| C7  | H7  | 0.9500   | C52 | H52 | 0.9500   |
| C8  | C9  | 1.394(4) | C53 | C54 | 1.408(4) |
| C8  | H8  | 0.9500   | C53 | H53 | 0.9500   |
| C9  | C10 | 1.384(4) | C54 | C55 | 1.385(4) |
| C9  | H9  | 0.9500   | C54 | C57 | 1.548(4) |
| C10 | H10 | 0.9500   | C55 | C56 | 1.397(4) |
| C11 | C12 | 1.390(4) | C55 | H55 | 0.9500   |
| C11 | C16 | 1.413(4) | C56 | H56 | 0.9500   |
| C12 | C13 | 1.397(4) | C57 | C58 | 1.549(4) |
| C12 | H12 | 0.9500   | C57 | C64 | 1.551(4) |
| C13 | C14 | 1.369(5) | C57 | C70 | 1.551(4) |

|     |     |          |     |     |          |
|-----|-----|----------|-----|-----|----------|
| C13 | H13 | 0.9500   | C58 | C59 | 1.395(4) |
| C14 | C15 | 1.395(5) | C58 | C63 | 1.398(4) |
| C14 | H14 | 0.9500   | C59 | C60 | 1.396(4) |
| C15 | C16 | 1.373(4) | C59 | H59 | 0.9500   |
| C15 | H15 | 0.9500   | C60 | C61 | 1.384(5) |
| C16 | H16 | 0.9500   | C60 | H60 | 0.9500   |
| C17 | C22 | 1.388(4) | C61 | C62 | 1.385(5) |
| C17 | C18 | 1.403(4) | C61 | H61 | 0.9500   |
| C18 | C19 | 1.388(4) | C62 | C63 | 1.393(4) |
| C18 | H18 | 0.9500   | C62 | H62 | 0.9500   |
| C19 | C20 | 1.379(4) | C63 | H63 | 0.9500   |
| C19 | H19 | 0.9500   | C64 | C69 | 1.391(4) |
| C20 | C21 | 1.388(5) | C64 | C65 | 1.408(4) |
| C20 | H20 | 0.9500   | C65 | C66 | 1.383(4) |
| C21 | C22 | 1.397(4) | C65 | H65 | 0.9500   |
| C21 | H21 | 0.9500   | C66 | C67 | 1.377(5) |
| C22 | H22 | 0.9500   | C66 | H66 | 0.9500   |
| C24 | C25 | 1.341(4) | C67 | C68 | 1.386(5) |
| C24 | H24 | 0.9500   | C67 | H67 | 0.9500   |
| C25 | H25 | 0.9500   | C68 | C69 | 1.399(4) |
| C26 | C31 | 1.383(4) | C68 | H68 | 0.9500   |
| C26 | C27 | 1.390(4) | C69 | H69 | 0.9500   |
| C27 | C28 | 1.378(4) | C70 | C75 | 1.390(4) |
| C27 | H27 | 0.9500   | C70 | C71 | 1.403(4) |
| C28 | C29 | 1.412(3) | C71 | C72 | 1.390(4) |
| C28 | H28 | 0.9500   | C71 | H71 | 0.9500   |
| C29 | C30 | 1.388(4) | C72 | C73 | 1.385(4) |
| C29 | C32 | 1.552(4) | C72 | H72 | 0.9500   |
| C30 | C31 | 1.401(4) | C73 | C74 | 1.379(4) |

|     |     |          |     |      |          |
|-----|-----|----------|-----|------|----------|
| C30 | H30 | 0.9500   | C73 | H73  | 0.9500   |
| C31 | H31 | 0.9500   | C74 | C75  | 1.390(4) |
| C32 | C45 | 1.543(4) | C74 | H74  | 0.9500   |
| C32 | C33 | 1.547(3) | C75 | H75  | 0.9500   |
| C32 | C39 | 1.554(4) | C76 | H76A | 0.9900   |
| C33 | C38 | 1.385(4) | C76 | H76B | 0.9900   |
| C33 | C34 | 1.399(4) | C77 | H77A | 0.9900   |
| C34 | C35 | 1.383(4) | C77 | H77B | 0.9900   |

**Table S5.** Bond Angles for Complex 4

| Atom | Atom | Atom | Angle/°    | Atom | Atom | Atom | Angle/°  |
|------|------|------|------------|------|------|------|----------|
| C1   | Pd1  | N3   | 175.17(9)  | C36  | C37  | C38  | 121.0(3) |
| C1   | Pd1  | Cl1  | 85.55(8)   | C36  | C37  | H37  | 119.5    |
| N3   | Pd1  | Cl1  | 90.64(7)   | C38  | C37  | H37  | 119.5    |
| C1   | Pd1  | Cl2  | 91.41(8)   | C33  | C38  | C37  | 120.7(3) |
| N3   | Pd1  | Cl2  | 92.43(7)   | C33  | C38  | H38  | 119.6    |
| Cl1  | Pd1  | Cl2  | 176.85(3)  | C37  | C38  | H38  | 119.6    |
| C23  | N3   | C2   | 105.9(2)   | C40  | C39  | C44  | 117.2(3) |
| C23  | N3   | Pd1  | 126.10(19) | C40  | C39  | C32  | 124.5(2) |
| C2   | N3   | Pd1  | 127.18(19) | C44  | C39  | C32  | 118.2(2) |
| C23  | N4   | C3   | 106.9(2)   | C39  | C40  | C41  | 121.0(3) |
| C23  | N4   | C4   | 124.7(2)   | C39  | C40  | H40  | 119.5    |
| C3   | N4   | C4   | 128.0(2)   | C41  | C40  | H40  | 119.5    |
| C1   | N1   | C24  | 110.4(2)   | C42  | C41  | C40  | 120.8(3) |
| C1   | N1   | C51  | 124.2(2)   | C42  | C41  | H41  | 119.6    |
| C24  | N1   | C51  | 125.4(2)   | C40  | C41  | H41  | 119.6    |
| C1   | N2   | C25  | 110.2(2)   | C41  | C42  | C43  | 119.1(3) |
| C1   | N2   | C26  | 122.4(2)   | C41  | C42  | H42  | 120.5    |
| C25  | N2   | C26  | 127.4(2)   | C43  | C42  | H42  | 120.5    |

|     |     |     |          |     |     |     |          |
|-----|-----|-----|----------|-----|-----|-----|----------|
| N3  | C23 | N4  | 111.2(2) | C44 | C43 | C42 | 120.1(3) |
| N3  | C23 | H23 | 124.4    | C44 | C43 | H43 | 120.0    |
| N4  | C23 | H23 | 124.4    | C42 | C43 | H43 | 120.0    |
| C3  | C2  | N3  | 109.6(3) | C43 | C44 | C39 | 121.7(3) |
| C3  | C2  | H2  | 125.2    | C43 | C44 | H44 | 119.1    |
| N3  | C2  | H2  | 125.2    | C39 | C44 | H44 | 119.1    |
| C2  | C3  | N4  | 106.3(2) | C46 | C45 | C50 | 117.9(3) |
| C2  | C3  | H3  | 126.8    | C46 | C45 | C32 | 123.7(3) |
| N4  | C3  | H3  | 126.8    | C50 | C45 | C32 | 118.3(2) |
| N4  | C4  | C11 | 106.5(2) | C45 | C46 | C47 | 120.7(3) |
| N4  | C4  | C5  | 108.4(2) | C45 | C46 | H46 | 119.6    |
| C11 | C4  | C5  | 112.9(2) | C47 | C46 | H46 | 119.6    |
| N4  | C4  | C17 | 107.8(2) | C48 | C47 | C46 | 120.6(3) |
| C11 | C4  | C17 | 112.0(2) | C48 | C47 | H47 | 119.7    |
| C5  | C4  | C17 | 109.0(2) | C46 | C47 | H47 | 119.7    |
| C6  | C5  | C10 | 118.8(3) | C47 | C48 | C49 | 119.3(3) |
| C6  | C5  | C4  | 122.9(2) | C47 | C48 | H48 | 120.4    |
| C10 | C5  | C4  | 118.3(2) | C49 | C48 | H48 | 120.4    |
| C5  | C6  | C7  | 120.7(3) | C48 | C49 | C50 | 120.1(3) |
| C5  | C6  | H6  | 119.7    | C48 | C49 | H49 | 119.9    |
| C7  | C6  | H6  | 119.7    | C50 | C49 | H49 | 119.9    |
| C8  | C7  | C6  | 120.5(3) | C49 | C50 | C45 | 121.4(3) |
| C8  | C7  | H7  | 119.8    | C49 | C50 | H50 | 119.3    |
| C6  | C7  | H7  | 119.8    | C45 | C50 | H50 | 119.3    |
| C7  | C8  | C9  | 119.1(3) | C52 | C51 | C56 | 121.2(2) |
| C7  | C8  | H8  | 120.5    | C52 | C51 | N1  | 119.0(2) |
| C9  | C8  | H8  | 120.5    | C56 | C51 | N1  | 119.7(2) |
| C10 | C9  | C8  | 120.7(3) | C51 | C52 | C53 | 119.2(2) |
| C10 | C9  | H9  | 119.6    | C51 | C52 | H52 | 120.4    |

|     |     |     |          |     |     |     |          |
|-----|-----|-----|----------|-----|-----|-----|----------|
| C8  | C9  | H9  | 119.6    | C53 | C52 | H52 | 120.4    |
| C9  | C10 | C5  | 120.2(3) | C52 | C53 | C54 | 121.5(3) |
| C9  | C10 | H10 | 119.9    | C52 | C53 | H53 | 119.3    |
| C5  | C10 | H10 | 119.9    | C54 | C53 | H53 | 119.3    |
| C12 | C11 | C16 | 117.9(3) | C55 | C54 | C53 | 117.7(2) |
| C12 | C11 | C4  | 122.8(2) | C55 | C54 | C57 | 123.9(2) |
| C16 | C11 | C4  | 119.3(2) | C53 | C54 | C57 | 118.4(2) |
| C11 | C12 | C13 | 120.4(3) | C54 | C55 | C56 | 121.6(2) |
| C11 | C12 | H12 | 119.8    | C54 | C55 | H55 | 119.2    |
| C13 | C12 | H12 | 119.8    | C56 | C55 | H55 | 119.2    |
| C14 | C13 | C12 | 120.9(3) | C51 | C56 | C55 | 118.7(3) |
| C14 | C13 | H13 | 119.5    | C51 | C56 | H56 | 120.7    |
| C12 | C13 | H13 | 119.5    | C55 | C56 | H56 | 120.7    |
| C13 | C14 | C15 | 119.4(3) | C54 | C57 | C58 | 110.3(2) |
| C13 | C14 | H14 | 120.3    | C54 | C57 | C64 | 108.4(2) |
| C15 | C14 | H14 | 120.3    | C58 | C57 | C64 | 108.2(2) |
| C16 | C15 | C14 | 120.3(3) | C54 | C57 | C70 | 107.3(2) |
| C16 | C15 | H15 | 119.8    | C58 | C57 | C70 | 110.6(2) |
| C14 | C15 | H15 | 119.8    | C64 | C57 | C70 | 112.0(2) |
| C15 | C16 | C11 | 121.0(3) | C59 | C58 | C63 | 117.7(3) |
| C15 | C16 | H16 | 119.5    | C59 | C58 | C57 | 122.7(3) |
| C11 | C16 | H16 | 119.5    | C63 | C58 | C57 | 119.5(3) |
| C22 | C17 | C18 | 117.9(3) | C58 | C59 | C60 | 120.9(3) |
| C22 | C17 | C4  | 123.0(3) | C58 | C59 | H59 | 119.6    |
| C18 | C17 | C4  | 119.1(2) | C60 | C59 | H59 | 119.6    |
| C19 | C18 | C17 | 121.3(3) | C61 | C60 | C59 | 120.5(3) |
| C19 | C18 | H18 | 119.3    | C61 | C60 | H60 | 119.8    |
| C17 | C18 | H18 | 119.3    | C59 | C60 | H60 | 119.8    |
| C20 | C19 | C18 | 120.1(3) | C60 | C61 | C62 | 119.5(3) |

|     |     |     |            |     |     |     |          |
|-----|-----|-----|------------|-----|-----|-----|----------|
| C20 | C19 | H19 | 119.9      | C60 | C61 | H61 | 120.2    |
| C18 | C19 | H19 | 119.9      | C62 | C61 | H61 | 120.2    |
| C19 | C20 | C21 | 119.5(3)   | C61 | C62 | C63 | 119.9(3) |
| C19 | C20 | H20 | 120.3      | C61 | C62 | H62 | 120.1    |
| C21 | C20 | H20 | 120.3      | C63 | C62 | H62 | 120.1    |
| C20 | C21 | C22 | 120.4(3)   | C62 | C63 | C58 | 121.5(3) |
| C20 | C21 | H21 | 119.8      | C62 | C63 | H63 | 119.2    |
| C22 | C21 | H21 | 119.8      | C58 | C63 | H63 | 119.2    |
| C17 | C22 | C21 | 120.7(3)   | C69 | C64 | C65 | 117.2(3) |
| C17 | C22 | H22 | 119.6      | C69 | C64 | C57 | 123.4(2) |
| C21 | C22 | H22 | 119.6      | C65 | C64 | C57 | 119.4(2) |
| N1  | C1  | N2  | 105.6(2)   | C66 | C65 | C64 | 121.2(3) |
| N1  | C1  | Pd1 | 129.04(19) | C66 | C65 | H65 | 119.4    |
| N2  | C1  | Pd1 | 125.06(19) | C64 | C65 | H65 | 119.4    |
| C25 | C24 | N1  | 107.1(2)   | C67 | C66 | C65 | 120.9(3) |
| C25 | C24 | H24 | 126.5      | C67 | C66 | H66 | 119.6    |
| N1  | C24 | H24 | 126.5      | C65 | C66 | H66 | 119.6    |
| C24 | C25 | N2  | 106.7(2)   | C66 | C67 | C68 | 119.1(3) |
| C24 | C25 | H25 | 126.6      | C66 | C67 | H67 | 120.5    |
| N2  | C25 | H25 | 126.6      | C68 | C67 | H67 | 120.5    |
| C31 | C26 | C27 | 120.5(2)   | C67 | C68 | C69 | 120.4(3) |
| C31 | C26 | N2  | 120.8(2)   | C67 | C68 | H68 | 119.8    |
| C27 | C26 | N2  | 118.6(2)   | C69 | C68 | H68 | 119.8    |
| C28 | C27 | C26 | 119.6(2)   | C64 | C69 | C68 | 121.2(3) |
| C28 | C27 | H27 | 120.2      | C64 | C69 | H69 | 119.4    |
| C26 | C27 | H27 | 120.2      | C68 | C69 | H69 | 119.4    |
| C27 | C28 | C29 | 121.2(2)   | C75 | C70 | C71 | 117.1(3) |
| C27 | C28 | H28 | 119.4      | C75 | C70 | C57 | 124.7(2) |
| C29 | C28 | H28 | 119.4      | C71 | C70 | C57 | 118.2(2) |

|     |     |     |          |      |     |      |          |
|-----|-----|-----|----------|------|-----|------|----------|
| C30 | C29 | C28 | 117.9(2) | C72  | C71 | C70  | 121.7(3) |
| C30 | C29 | C32 | 125.5(2) | C72  | C71 | H71  | 119.1    |
| C28 | C29 | C32 | 116.6(2) | C70  | C71 | H71  | 119.1    |
| C29 | C30 | C31 | 121.0(2) | C73  | C72 | C71  | 119.8(3) |
| C29 | C30 | H30 | 119.5    | C73  | C72 | H72  | 120.1    |
| C31 | C30 | H30 | 119.5    | C71  | C72 | H72  | 120.1    |
| C26 | C31 | C30 | 119.5(3) | C74  | C73 | C72  | 119.3(3) |
| C26 | C31 | H31 | 120.3    | C74  | C73 | H73  | 120.3    |
| C30 | C31 | H31 | 120.3    | C72  | C73 | H73  | 120.3    |
| C45 | C32 | C33 | 112.0(2) | C73  | C74 | C75  | 120.7(3) |
| C45 | C32 | C29 | 105.1(2) | C73  | C74 | H74  | 119.6    |
| C33 | C32 | C29 | 112.4(2) | C75  | C74 | H74  | 119.6    |
| C45 | C32 | C39 | 112.3(2) | C70  | C75 | C74  | 121.3(3) |
| C33 | C32 | C39 | 105.9(2) | C70  | C75 | H75  | 119.3    |
| C29 | C32 | C39 | 109.3(2) | C74  | C75 | H75  | 119.3    |
| C38 | C33 | C34 | 117.4(2) | Cl3  | C76 | Cl4  | 111.2(3) |
| C38 | C33 | C32 | 123.2(3) | Cl3  | C76 | H76A | 109.4    |
| C34 | C33 | C32 | 119.2(2) | Cl4  | C76 | H76A | 109.4    |
| C35 | C34 | C33 | 121.7(3) | Cl3  | C76 | H76B | 109.4    |
| C35 | C34 | H34 | 119.1    | Cl4  | C76 | H76B | 109.4    |
| C33 | C34 | H34 | 119.1    | H76A | C76 | H76B | 108.0    |
| C34 | C35 | C36 | 120.0(3) | Cl5  | C77 | Cl6  | 110.6(2) |
| C34 | C35 | H35 | 120.0    | Cl5  | C77 | H77A | 109.5    |
| C36 | C35 | H35 | 120.0    | Cl6  | C77 | H77A | 109.5    |
| C37 | C36 | C35 | 119.1(3) | Cl5  | C77 | H77B | 109.5    |
| C37 | C36 | H36 | 120.4    | Cl6  | C77 | H77B | 109.5    |
| C35 | C36 | H36 | 120.4    | H77A | C77 | H77B | 108.1    |

**Table S6.** Torsion Angles for Complex 4.

| A   | B  | C   | D   | Angle/°     | A   | B   | C   | D   | Angle/°   |
|-----|----|-----|-----|-------------|-----|-----|-----|-----|-----------|
| C2  | N3 | C23 | N4  | 0.5(3)      | C38 | C33 | C34 | C35 | -1.6(5)   |
| Pd1 | N3 | C23 | N4  | -169.68(17) | C32 | C33 | C34 | C35 | -176.3(3) |
| C3  | N4 | C23 | N3  | -0.8(3)     | C33 | C34 | C35 | C36 | 1.3(5)    |
| C4  | N4 | C23 | N3  | -174.5(2)   | C34 | C35 | C36 | C37 | 0.1(5)    |
| C23 | N3 | C2  | C3  | 0.0(3)      | C35 | C36 | C37 | C38 | -1.0(5)   |
| Pd1 | N3 | C2  | C3  | 170.00(18)  | C34 | C33 | C38 | C37 | 0.7(4)    |
| N3  | C2 | C3  | N4  | -0.4(3)     | C32 | C33 | C38 | C37 | 175.1(3)  |
| C23 | N4 | C3  | C2  | 0.7(3)      | C36 | C37 | C38 | C33 | 0.6(5)    |
| C4  | N4 | C3  | C2  | 174.1(2)    | C45 | C32 | C39 | C40 | 111.0(3)  |
| C23 | N4 | C4  | C11 | -39.7(3)    | C33 | C32 | C39 | C40 | -126.5(3) |
| C3  | N4 | C4  | C11 | 147.9(2)    | C29 | C32 | C39 | C40 | -5.3(4)   |
| C23 | N4 | C4  | C5  | 82.0(3)     | C45 | C32 | C39 | C44 | -71.8(3)  |
| C3  | N4 | C4  | C5  | -90.3(3)    | C33 | C32 | C39 | C44 | 50.7(3)   |
| C23 | N4 | C4  | C17 | -160.1(2)   | C29 | C32 | C39 | C44 | 171.9(2)  |
| C3  | N4 | C4  | C17 | 27.6(3)     | C44 | C39 | C40 | C41 | 1.7(4)    |
| N4  | C4 | C5  | C6  | -13.0(4)    | C32 | C39 | C40 | C41 | 178.9(3)  |
| C11 | C4 | C5  | C6  | 104.7(3)    | C39 | C40 | C41 | C42 | -1.5(5)   |
| C17 | C4 | C5  | C6  | -130.2(3)   | C40 | C41 | C42 | C43 | 0.3(5)    |
| N4  | C4 | C5  | C10 | 165.8(3)    | C41 | C42 | C43 | C44 | 0.6(5)    |
| C11 | C4 | C5  | C10 | -76.4(3)    | C42 | C43 | C44 | C39 | -0.5(5)   |
| C17 | C4 | C5  | C10 | 48.7(3)     | C40 | C39 | C44 | C43 | -0.7(4)   |
| C10 | C5 | C6  | C7  | -0.5(4)     | C32 | C39 | C44 | C43 | -178.0(3) |
| C4  | C5 | C6  | C7  | 178.4(3)    | C33 | C32 | C45 | C46 | -117.6(3) |
| C5  | C6 | C7  | C8  | 0.4(5)      | C29 | C32 | C45 | C46 | 120.1(3)  |
| C6  | C7 | C8  | C9  | 0.0(5)      | C39 | C32 | C45 | C46 | 1.4(3)    |
| C7  | C8 | C9  | C10 | -0.2(5)     | C33 | C32 | C45 | C50 | 67.2(3)   |
| C8  | C9 | C10 | C5  | 0.1(5)      | C29 | C32 | C45 | C50 | -55.1(3)  |
| C6  | C5 | C10 | C9  | 0.3(5)      | C39 | C32 | C45 | C50 | -173.8(2) |



|     |     |     |     |           |     |     |     |     |           |
|-----|-----|-----|-----|-----------|-----|-----|-----|-----|-----------|
| C4  | C5  | C10 | C9  | -178.6(3) | C50 | C45 | C46 | C47 | 0.6(4)    |
| N4  | C4  | C11 | C12 | 133.2(3)  | C32 | C45 | C46 | C47 | -174.6(2) |
| C5  | C4  | C11 | C12 | 14.3(4)   | C45 | C46 | C47 | C48 | 0.1(4)    |
| C17 | C4  | C11 | C12 | -109.2(3) | C46 | C47 | C48 | C49 | -0.8(5)   |
| N4  | C4  | C11 | C16 | -47.7(3)  | C47 | C48 | C49 | C50 | 0.9(5)    |
| C5  | C4  | C11 | C16 | -166.6(2) | C48 | C49 | C50 | C45 | -0.1(4)   |
| C17 | C4  | C11 | C16 | 69.9(3)   | C46 | C45 | C50 | C49 | -0.6(4)   |
| C16 | C11 | C12 | C13 | -2.6(4)   | C32 | C45 | C50 | C49 | 174.9(2)  |
| C4  | C11 | C12 | C13 | 176.6(3)  | C1  | N1  | C51 | C52 | -45.6(4)  |
| C11 | C12 | C13 | C14 | 0.7(5)    | C24 | N1  | C51 | C52 | 135.8(3)  |
| C12 | C13 | C14 | C15 | 1.2(5)    | C1  | N1  | C51 | C56 | 132.5(3)  |
| C13 | C14 | C15 | C16 | -1.0(5)   | C24 | N1  | C51 | C56 | -46.1(4)  |
| C14 | C15 | C16 | C11 | -1.0(5)   | C56 | C51 | C52 | C53 | -3.3(4)   |
| C12 | C11 | C16 | C15 | 2.7(4)    | N1  | C51 | C52 | C53 | 174.7(2)  |
| C4  | C11 | C16 | C15 | -176.5(3) | C51 | C52 | C53 | C54 | 0.9(4)    |
| N4  | C4  | C17 | C22 | 102.7(3)  | C52 | C53 | C54 | C55 | 2.4(4)    |
| C11 | C4  | C17 | C22 | -14.1(4)  | C52 | C53 | C54 | C57 | -174.1(3) |
| C5  | C4  | C17 | C22 | -139.7(3) | C53 | C54 | C55 | C56 | -3.4(4)   |
| N4  | C4  | C17 | C18 | -76.2(3)  | C57 | C54 | C55 | C56 | 172.9(3)  |
| C11 | C4  | C17 | C18 | 166.9(2)  | C52 | C51 | C56 | C55 | 2.4(4)    |
| C5  | C4  | C17 | C18 | 41.3(3)   | N1  | C51 | C56 | C55 | -175.7(2) |
| C22 | C17 | C18 | C19 | -1.9(4)   | C54 | C55 | C56 | C51 | 1.1(4)    |
| C4  | C17 | C18 | C19 | 177.1(2)  | C55 | C54 | C57 | C58 | 18.4(4)   |
| C17 | C18 | C19 | C20 | -0.2(4)   | C53 | C54 | C57 | C58 | -165.3(2) |
| C18 | C19 | C20 | C21 | 2.3(5)    | C55 | C54 | C57 | C64 | -99.8(3)  |
| C19 | C20 | C21 | C22 | -2.2(5)   | C53 | C54 | C57 | C64 | 76.5(3)   |
| C18 | C17 | C22 | C21 | 2.0(4)    | C55 | C54 | C57 | C70 | 139.0(3)  |
| C4  | C17 | C22 | C21 | -177.0(3) | C53 | C54 | C57 | C70 | -44.7(3)  |
| C20 | C21 | C22 | C17 | 0.1(5)    | C54 | C57 | C58 | C59 | 102.6(3)  |

|     |     |     |     |           |     |     |     |     |           |
|-----|-----|-----|-----|-----------|-----|-----|-----|-----|-----------|
| C24 | N1  | C1  | N2  | 0.9(3)    | C64 | C57 | C58 | C59 | -139.0(3) |
| C51 | N1  | C1  | N2  | -177.9(2) | C70 | C57 | C58 | C59 | -16.0(3)  |
| C24 | N1  | C1  | Pd1 | -173.2(2) | C54 | C57 | C58 | C63 | -74.1(3)  |
| C51 | N1  | C1  | Pd1 | 8.0(4)    | C64 | C57 | C58 | C63 | 44.3(3)   |
| C25 | N2  | C1  | N1  | -0.9(3)   | C70 | C57 | C58 | C63 | 167.3(2)  |
| C26 | N2  | C1  | N1  | -178.3(2) | C63 | C58 | C59 | C60 | 2.1(4)    |
| C25 | N2  | C1  | Pd1 | 173.4(2)  | C57 | C58 | C59 | C60 | -174.6(3) |
| C26 | N2  | C1  | Pd1 | -3.9(4)   | C58 | C59 | C60 | C61 | 0.1(4)    |
| C1  | N1  | C24 | C25 | -0.5(3)   | C59 | C60 | C61 | C62 | -1.2(5)   |
| C51 | N1  | C24 | C25 | 178.3(3)  | C60 | C61 | C62 | C63 | 0.1(4)    |
| N1  | C24 | C25 | N2  | -0.1(3)   | C61 | C62 | C63 | C58 | 2.2(4)    |
| C1  | N2  | C25 | C24 | 0.7(3)    | C59 | C58 | C63 | C62 | -3.2(4)   |
| C26 | N2  | C25 | C24 | 177.9(3)  | C57 | C58 | C63 | C62 | 173.6(2)  |
| C1  | N2  | C26 | C31 | 130.0(3)  | C54 | C57 | C64 | C69 | -6.6(4)   |
| C25 | N2  | C26 | C31 | -46.8(4)  | C58 | C57 | C64 | C69 | -126.1(3) |
| C1  | N2  | C26 | C27 | -45.6(4)  | C70 | C57 | C64 | C69 | 111.7(3)  |
| C25 | N2  | C26 | C27 | 137.5(3)  | C54 | C57 | C64 | C65 | 171.9(2)  |
| C31 | C26 | C27 | C28 | -3.2(4)   | C58 | C57 | C64 | C65 | 52.3(3)   |
| N2  | C26 | C27 | C28 | 172.5(2)  | C70 | C57 | C64 | C65 | -69.9(3)  |
| C26 | C27 | C28 | C29 | -1.5(4)   | C69 | C64 | C65 | C66 | -2.7(4)   |
| C27 | C28 | C29 | C30 | 5.8(4)    | C57 | C64 | C65 | C66 | 178.8(3)  |
| C27 | C28 | C29 | C32 | -173.5(3) | C64 | C65 | C66 | C67 | 1.3(5)    |
| C28 | C29 | C30 | C31 | -5.7(4)   | C65 | C66 | C67 | C68 | 0.8(5)    |
| C32 | C29 | C30 | C31 | 173.6(3)  | C66 | C67 | C68 | C69 | -1.5(5)   |
| C27 | C26 | C31 | C30 | 3.3(4)    | C65 | C64 | C69 | C68 | 1.9(4)    |
| N2  | C26 | C31 | C30 | -172.3(3) | C57 | C64 | C69 | C68 | -179.6(3) |
| C29 | C30 | C31 | C26 | 1.2(4)    | C67 | C68 | C69 | C64 | 0.1(5)    |
| C30 | C29 | C32 | C45 | 129.5(3)  | C54 | C57 | C70 | C75 | 134.5(3)  |
| C28 | C29 | C32 | C45 | -51.3(3)  | C58 | C57 | C70 | C75 | -105.2(3) |

|     |     |     |     |           |     |     |     |     |           |
|-----|-----|-----|-----|-----------|-----|-----|-----|-----|-----------|
| C30 | C29 | C32 | C33 | 7.5(4)    | C64 | C57 | C70 | C75 | 15.6(3)   |
| C28 | C29 | C32 | C33 | -173.3(2) | C54 | C57 | C70 | C71 | -45.4(3)  |
| C30 | C29 | C32 | C39 | -109.8(3) | C58 | C57 | C70 | C71 | 74.9(3)   |
| C28 | C29 | C32 | C39 | 69.5(3)   | C64 | C57 | C70 | C71 | -164.3(2) |
| C45 | C32 | C33 | C38 | 2.1(4)    | C75 | C70 | C71 | C72 | 0.1(4)    |
| C29 | C32 | C33 | C38 | 120.1(3)  | C57 | C70 | C71 | C72 | -180.0(2) |
| C39 | C32 | C33 | C38 | -120.6(3) | C70 | C71 | C72 | C73 | -0.4(4)   |
| C45 | C32 | C33 | C34 | 176.4(3)  | C71 | C72 | C73 | C74 | 0.4(4)    |
| C29 | C32 | C33 | C34 | -65.6(3)  | C72 | C73 | C74 | C75 | -0.3(4)   |
| C39 | C32 | C33 | C34 | 53.7(3)   | C71 | C70 | C75 | C74 | 0.0(4)    |
| C57 | C70 | C75 | C74 | -179.9(3) | C73 | C74 | C75 | C70 | 0.0(4)    |

**Table S7.** Hydrogen Atom Coordinates ( $\text{\AA}\times 10^4$ ) and Isotropic Displacement Parameters ( $\text{\AA}^2\times 10^3$ ) for Complex **4**.

|     | <i>X</i> | <i>y</i> | <i>z</i> | U(eq) |
|-----|----------|----------|----------|-------|
| H23 | 1868     | 2116     | 3047     | 18    |
| H2  | -1078    | 888      | 3028     | 20    |
| H3  | 306      | -126     | 3980     | 17    |
| H6  | 864      | 1643     | 4497     | 20    |
| H7  | 505      | 1944     | 5604     | 25    |
| H8  | 1730     | 1305     | 6670     | 30    |
| H9  | 3324     | 359      | 6624     | 30    |
| H10 | 3679     | 49       | 5530     | 26    |
| H12 | 4393     | 1431     | 4471     | 25    |
| H13 | 6131     | 1993     | 3734     | 33    |
| H14 | 6467     | 1916     | 2538     | 36    |
| H15 | 5019     | 1305     | 2047     | 33    |
| H16 | 3287     | 750      | 2764     | 25    |
| H18 | 1268     | -625     | 5258     | 20    |
| H19 | 1317     | -2095    | 5655     | 24    |

|     |       |       |       |    |
|-----|-------|-------|-------|----|
| H20 | 2709  | -2775 | 5092  | 28 |
| H21 | 4142  | -1982 | 4187  | 30 |
| H22 | 4100  | -505  | 3786  | 23 |
| H24 | -2532 | 5306  | -112  | 19 |
| H25 | -1156 | 4693  | -854  | 20 |
| H27 | 1564  | 3340  | 818   | 15 |
| H28 | 2920  | 2313  | 686   | 16 |
| H30 | 748   | 2025  | -875  | 20 |
| H31 | -620  | 3067  | -748  | 20 |
| H34 | 869   | 486   | -201  | 27 |
| H35 | 422   | -140  | -1054 | 34 |
| H36 | 1849  | -144  | -2016 | 31 |
| H37 | 3694  | 480   | -2102 | 28 |
| H38 | 4132  | 1146  | -1264 | 20 |
| H40 | 1483  | 1073  | 1299  | 21 |
| H41 | 1331  | -93   | 2453  | 29 |
| H42 | 2366  | -1375 | 2609  | 31 |
| H43 | 3589  | -1476 | 1596  | 32 |
| H44 | 3790  | -305  | 458   | 25 |
| H46 | 4895  | 826   | 822   | 22 |
| H47 | 6740  | 1506  | 627   | 31 |
| H48 | 7064  | 2728  | -462  | 36 |
| H49 | 5542  | 3251  | -1377 | 30 |
| H50 | 3704  | 2577  | -1184 | 23 |
| H52 | -2737 | 3299  | 2114  | 19 |
| H53 | -3530 | 3527  | 3187  | 19 |
| H55 | -3044 | 6038  | 2113  | 16 |
| H56 | -2190 | 5812  | 1042  | 17 |
| H59 | -5951 | 5767  | 3452  | 23 |

|      |       |      |      |    |
|------|-------|------|------|----|
| H60  | -6407 | 7212 | 3123 | 32 |
| H61  | -4848 | 8169 | 2845 | 31 |
| H62  | -2818 | 7671 | 2932 | 29 |
| H63  | -2360 | 6223 | 3300 | 24 |
| H65  | -3508 | 5014 | 4905 | 24 |
| H66  | -1964 | 4572 | 5789 | 33 |
| H67  | -170  | 3933 | 5534 | 37 |
| H68  | 83    | 3761 | 4360 | 32 |
| H69  | -1481 | 4178 | 3474 | 23 |
| H71  | -5693 | 4745 | 2811 | 21 |
| H72  | -7415 | 3936 | 3213 | 27 |
| H73  | -7646 | 3022 | 4498 | 29 |
| H74  | -6157 | 2943 | 5370 | 29 |
| H75  | -4440 | 3754 | 4972 | 22 |
| H76A | 421   | 5439 | 3064 | 87 |
| H76B | -116  | 5786 | 2217 | 87 |
| H77A | 4564  | 3618 | 2065 | 43 |
| H77B | 3267  | 3776 | 1667 | 43 |

**Table S8.** Crystal data and structure refinement for complex **5**.

|                     |                                                                                            |
|---------------------|--------------------------------------------------------------------------------------------|
| Identification code | <b>5</b>                                                                                   |
| Empirical formula   | C <sub>47.20</sub> H <sub>36.80</sub> Cl <sub>4</sub> N <sub>2.40</sub> Pd <sub>0.80</sub> |
| Formula weight      | 864.51                                                                                     |
| Temperature/K       | 173(2)                                                                                     |
| Crystal system      | Monoclinic                                                                                 |
| Space group         | P 21                                                                                       |
| a/Å                 | 9.1629(5)                                                                                  |
| b/Å                 | 31.1003(17)                                                                                |
| c/Å                 | 17.7075(9)                                                                                 |
| $\alpha$ /°         | 90                                                                                         |

|                                               |                                                              |
|-----------------------------------------------|--------------------------------------------------------------|
| $\beta/^\circ$                                | 97.4920(10)                                                  |
| $\gamma/^\circ$                               | 90                                                           |
| Volume/ $\text{\AA}^3$                        | 5003.0(5)                                                    |
| Z                                             | 5                                                            |
| $\rho_{\text{calc}}/\text{g}/\text{cm}^3$     | 1.435                                                        |
| $\mu/\text{mm}^{-1}$                          | 0.681                                                        |
| F(000)                                        | 2208                                                         |
| Crystal size/ $\text{mm}^3$                   | $0.18 \times 0.17 \times 0.15$                               |
| Radiation                                     | MoK $\alpha$ ( $\lambda = 0.71073$ )                         |
| $2\Theta$ range for data collection/ $^\circ$ | 1.309 to 28.272                                              |
| Index ranges                                  | $-10 \leq h \leq 12, -33 \leq k \leq 41, -23 \leq l \leq 23$ |
| Reflections collected                         | 37510                                                        |
| Independent reflections                       | 19535 [R(int) = 0.0639]                                      |
| Data/restraints/parameters                    | 19535 / 13 / 1226                                            |
| Goodness-of-fit on $F^2$                      | 1.061                                                        |
| Final R indexes [ $I \geq 2\sigma(I)$ ]       | R1 = 0.0606, wR2 = 0.1301                                    |
| Final R indexes [all data]                    | R1 = 0.0962, wR2 = 0.1467                                    |
| Largest diff. peak/hole / $e \text{\AA}^{-3}$ | 2.178 -1.067                                                 |

**Table S9.** Fractional Atomic Coordinates ( $\times 10^4$ ) and Equivalent Isotropic Displacement Parameters ( $\text{\AA}^2 \times 10^3$ ) for Complex **5**.  $U_{\text{eq}}$  is defined as 1/3 of the trace of the orthogonalised  $U_{ij}$  tensor.

| Atom | x       | y        | z       | U(eq) |
|------|---------|----------|---------|-------|
| Pd1  | 5712(1) | 9079(1)  | 3562(1) | 17(1) |
| Pd2  | 2445(1) | 6630(1)  | 3495(1) | 16(1) |
| Cl1  | 3807(2) | 9576(1)  | 3317(2) | 22(1) |
| Cl2  | 7479(2) | 8545(1)  | 3815(1) | 18(1) |
| Cl3  | 7224(2) | 10626(1) | 5169(1) | 18(1) |
| Cl4  | 627(2)  | 7152(1)  | 3314(1) | 16(1) |
| Cl5  | 4453(2) | 6170(1)  | 3622(1) | 22(1) |
| Cl6  | 1002(3) | 5059(1)  | 1847(1) | 21(1) |

|      |           |          |          |        |
|------|-----------|----------|----------|--------|
| CI7  | 3757(6)   | 9899(2)  | 10838(4) | 128(2) |
| CI8  | 2840(10)  | 9565(3)  | 9326(5)  | 177(4) |
| CI9  | 4547(7)   | 1049(3)  | 2199(4)  | 157(3) |
| CI10 | 7051(6)   | 473(3)   | 2445(3)  | 158(4) |
| N1   | 3223(8)   | 8447(2)  | 3481(4)  | 14(2)  |
| N2   | 4356(8)   | 8429(2)  | 2495(4)  | 16(2)  |
| N3   | 7243(8)   | 9562(3)  | 3956(4)  | 22(2)  |
| N4   | 4887(8)   | 7274(3)  | 3628(4)  | 16(2)  |
| N5   | 3719(8)   | 7278(2)  | 4605(4)  | 14(2)  |
| N6   | 952(9)    | 6142(3)  | 3091(4)  | 20(2)  |
| C28  | 1533(8)   | 8993(3)  | 6358(5)  | 10(2)  |
| C2   | 1794(9)   | 8648(3)  | 6977(5)  | 13(2)  |
| C3   | 2516(10)  | 8260(3)  | 6898(5)  | 19(2)  |
| C4   | 2682(10)  | 7966(3)  | 7486(5)  | 20(2)  |
| C5   | 2181(10)  | 8037(3)  | 8167(5)  | 18(2)  |
| C6   | 1494(9)   | 8428(3)  | 8270(5)  | 20(2)  |
| C7   | 1293(9)   | 8725(3)  | 7679(5)  | 17(2)  |
| C8   | 2532(10)  | 9391(3)  | 6537(5)  | 18(2)  |
| C9   | 3388(10)  | 9448(3)  | 7249(5)  | 18(2)  |
| C10  | 4352(11)  | 9794(3)  | 7389(6)  | 23(2)  |
| C11  | 4460(11)  | 10095(3) | 6828(6)  | 23(2)  |
| C12  | 3598(10)  | 10054(3) | 6127(6)  | 23(2)  |
| C13  | 2666(11)  | 9701(3)  | 5977(6)  | 20(2)  |
| C14  | -107(8)   | 9113(3)  | 6281(4)  | 14(2)  |
| C15  | -633(10)  | 9534(3)  | 6322(5)  | 18(2)  |
| C16  | -2124(10) | 9620(3)  | 6245(5)  | 21(2)  |
| C17  | -3150(10) | 9292(3)  | 6146(5)  | 18(2)  |
| C18  | -2649(10) | 8870(3)  | 6126(5)  | 19(2)  |
| C19  | -1163(10) | 8788(3)  | 6193(5)  | 15(2)  |

|     |           |         |          |       |
|-----|-----------|---------|----------|-------|
| C20 | 1913(9)   | 8826(3) | 5585(5)  | 14(2) |
| C21 | 3400(9)   | 8763(3) | 5503(5)  | 14(2) |
| C22 | 3842(9)   | 8640(3) | 4824(5)  | 18(2) |
| C23 | 2787(9)   | 8567(3) | 4198(5)  | 15(2) |
| C24 | 1320(10)  | 8619(3) | 4263(5)  | 20(2) |
| C25 | 887(9)    | 8748(3) | 4952(5)  | 16(2) |
| C26 | 2535(9)   | 8135(3) | 2998(5)  | 15(2) |
| C27 | 3234(10)  | 8121(3) | 2389(5)  | 19(2) |
| C1  | 4327(10)  | 8627(3) | 3169(5)  | 17(2) |
| C29 | 5397(9)   | 8525(3) | 1980(5)  | 15(2) |
| C30 | 5385(11)  | 8925(3) | 1665(6)  | 22(2) |
| C31 | 6399(10)  | 9026(3) | 1182(5)  | 23(2) |
| C32 | 7434(10)  | 8724(3) | 994(5)   | 18(2) |
| C33 | 7400(10)  | 8322(3) | 1317(5)  | 21(2) |
| C34 | 6359(10)  | 8213(3) | 1803(5)  | 21(2) |
| C35 | 8514(9)   | 8871(3) | 436(5)   | 15(2) |
| C36 | 9690(10)  | 8530(3) | 352(5)   | 20(2) |
| C37 | 9271(10)  | 8132(3) | 13(5)    | 21(2) |
| C38 | 10267(11) | 7812(3) | -105(5)  | 23(2) |
| C39 | 11781(11) | 7895(4) | 114(5)   | 27(2) |
| C40 | 12223(11) | 8283(4) | 429(5)   | 28(2) |
| C41 | 11201(10) | 8598(3) | 543(5)   | 24(2) |
| C42 | 7670(9)   | 8922(3) | -369(5)  | 15(2) |
| C43 | 6190(10)  | 8811(3) | -556(5)  | 21(2) |
| C44 | 5509(11)  | 8804(4) | -1319(5) | 27(2) |
| C45 | 6326(11)  | 8903(3) | -1893(5) | 23(2) |
| C46 | 7779(10)  | 9025(3) | -1729(5) | 22(2) |
| C47 | 8441(9)   | 9024(3) | -991(5)  | 20(2) |
| C48 | 9159(10)  | 9291(3) | 765(5)   | 21(2) |



|     |           |          |          |       |
|-----|-----------|----------|----------|-------|
| C49 | 9929(11)  | 9308(4)  | 1503(6)  | 25(2) |
| C50 | 10455(12) | 9680(4)  | 1842(6)  | 34(3) |
| C51 | 10207(12) | 10070(4) | 1470(6)  | 38(3) |
| C52 | 9435(11)  | 10073(4) | 751(6)   | 34(2) |
| C53 | 8919(10)  | 9693(3)  | 389(6)   | 25(2) |
| C54 | 6854(12)  | 9888(3)  | 4355(6)  | 28(2) |
| C55 | 7845(11)  | 10210(4) | 4614(6)  | 28(2) |
| C56 | 9282(12)  | 10183(4) | 4444(6)  | 33(3) |
| C57 | 9653(12)  | 9850(4)  | 4025(6)  | 33(3) |
| C58 | 8635(11)  | 9541(4)  | 3784(6)  | 28(2) |
| C59 | 6620(9)   | 6699(3)  | 785(4)   | 18(2) |
| C60 | 6309(9)   | 7023(3)  | 125(5)   | 16(2) |
| C61 | 5595(9)   | 7420(3)  | 191(5)   | 19(2) |
| C62 | 5402(10)  | 7705(3)  | -409(5)  | 19(2) |
| C63 | 5902(10)  | 7613(3)  | -1089(5) | 22(2) |
| C64 | 6638(10)  | 7232(3)  | -1164(5) | 22(2) |
| C65 | 6833(9)   | 6945(3)  | -570(5)  | 16(2) |
| C66 | 5658(9)   | 6292(3)  | 630(5)   | 16(2) |
| C67 | 5515(11)  | 6017(3)  | 1249(6)  | 25(2) |
| C68 | 4618(11)  | 5650(3)  | 1156(6)  | 28(2) |
| C69 | 3904(11)  | 5551(3)  | 447(6)   | 28(2) |
| C70 | 4056(11)  | 5808(3)  | -167(6)  | 26(2) |
| C71 | 4926(10)  | 6184(3)  | -67(5)   | 20(2) |
| C72 | 8263(9)   | 6581(3)  | 837(5)   | 17(2) |
| C73 | 9309(9)   | 6917(3)  | 921(5)   | 16(2) |
| C74 | 10793(10) | 6823(3)  | 976(5)   | 22(2) |
| C75 | 11253(10) | 6397(3)  | 911(5)   | 23(2) |
| C76 | 10249(10) | 6077(3)  | 801(5)   | 21(2) |
| C77 | 8755(10)  | 6162(3)  | 782(5)   | 20(2) |

|      |           |         |         |       |
|------|-----------|---------|---------|-------|
| C78  | 6247(10)  | 6885(3) | 1544(5) | 18(2) |
| C79  | 7257(10)  | 6969(3) | 2170(5) | 16(2) |
| C80  | 6805(10)  | 7103(3) | 2863(5) | 16(2) |
| C81  | 5328(9)   | 7157(3) | 2903(5) | 14(2) |
| C82  | 4288(10)  | 7094(3) | 2287(5) | 16(2) |
| C83  | 4737(10)  | 6959(3) | 1600(5) | 19(2) |
| C84  | 5553(10)  | 7582(3) | 4121(5) | 18(2) |
| C85  | 4815(10)  | 7582(3) | 4720(5) | 20(2) |
| C86  | 3777(9)   | 7084(3) | 3926(5) | 14(2) |
| C87  | 2705(10)  | 7165(3) | 5124(5) | 18(2) |
| C88  | 1707(10)  | 7468(3) | 5299(5) | 19(2) |
| C89  | 702(10)   | 7355(3) | 5802(5) | 18(2) |
| C90  | 669(10)   | 6947(3) | 6112(5) | 17(2) |
| C91  | 1673(9)   | 6647(3) | 5903(5) | 20(2) |
| C92  | 2690(10)  | 6750(3) | 5408(5) | 18(2) |
| C93  | -369(10)  | 6812(3) | 6681(5) | 15(2) |
| C94  | -1104(10) | 6388(3) | 6391(5) | 16(2) |
| C95  | -1859(11) | 6376(3) | 5647(6) | 26(2) |
| C96  | -2667(12) | 6019(4) | 5361(6) | 29(2) |
| C97  | -2728(11) | 5664(3) | 5821(6) | 29(2) |
| C98  | -1950(11) | 5656(3) | 6542(6) | 26(2) |
| C99  | -1129(11) | 6017(3) | 6825(5) | 20(2) |
| C100 | 496(10)   | 6770(3) | 7497(5) | 17(2) |
| C101 | -280(10)  | 6670(3) | 8107(5) | 21(2) |
| C102 | 424(10)   | 6654(4) | 8837(5) | 25(2) |
| C103 | 1933(11)  | 6740(3) | 8992(5) | 25(2) |
| C104 | 2700(11)  | 6825(3) | 8398(6) | 26(2) |
| C105 | 1999(10)  | 6834(3) | 7658(5) | 20(2) |
| C106 | -1554(10) | 7160(3) | 6775(5) | 16(2) |

|      |           |         |          |         |
|------|-----------|---------|----------|---------|
| C107 | -1099(10) | 7549(3) | 7127(5)  | 17(2)   |
| C108 | -2119(10) | 7862(3) | 7221(5)  | 21(2)   |
| C109 | -3586(11) | 7805(3) | 7001(5)  | 21(2)   |
| C110 | -4046(10) | 7419(3) | 6688(5)  | 21(2)   |
| C111 | -3061(10) | 7096(3) | 6567(5)  | 19(2)   |
| C112 | 414(13)   | 5488(3) | 2424(6)  | 31(3)   |
| C113 | 1370(11)  | 5812(3) | 2665(5)  | 23(2)   |
| C114 | -416(10)  | 6145(3) | 3272(6)  | 26(2)   |
| C115 | -1422(12) | 5825(4) | 3040(6)  | 29(2)   |
| C116 | -1031(12) | 5484(4) | 2610(6)  | 35(3)   |
| C117 | 2774(15)  | 9995(6) | 9914(10) | 76(5)   |
| C118 | 5351(18)  | 617(8)  | 2695(13) | 135(10) |

**Table S10.** Anisotropic Displacement Parameters ( $\text{\AA}^2 \times 10^3$ ) for Complex **5**. The Anisotropic displacement factor exponent takes the form:  $-2\pi^2[h^2a^*U_{11}+2hka^*b^*U_{12}+\dots]$ .

| Atom | U11    | U22    | U33    | U23    | U13    | U12   |
|------|--------|--------|--------|--------|--------|-------|
| Pd1  | 15(1)  | 18(1)  | 18(1)  | -1(1)  | 3(1)   | -2(1) |
| Pd2  | 15(1)  | 17(1)  | 16(1)  | -2(1)  | 3(1)   | -1(1) |
| Cl1  | 17(1)  | 12(1)  | 36(1)  | -4(1)  | -3(1)  | 4(1)  |
| Cl2  | 8(1)   | 18(1)  | 29(1)  | 2(1)   | -2(1)  | -2(1) |
| Cl3  | 28(1)  | 9(1)   | 18(1)  | -4(1)  | 3(1)   | -3(1) |
| Cl4  | 7(1)   | 12(1)  | 27(1)  | -2(1)  | -2(1)  | -1(1) |
| Cl5  | 17(1)  | 17(1)  | 30(1)  | -1(1)  | 0(1)   | 6(1)  |
| Cl6  | 35(1)  | 11(1)  | 17(1)  | -4(1)  | 9(1)   | -3(1) |
| Cl7  | 89(4)  | 145(5) | 157(5) | 85(4)  | 37(4)  | 46(3) |
| Cl8  | 237(9) | 127(6) | 197(8) | -44(5) | 143(7) | -9(6) |
| Cl9  | 111(4) | 186(7) | 193(7) | 122(6) | 89(5)  | 51(4) |
| Cl10 | 78(3)  | 277(9) | 127(5) | 130(6) | 46(3)  | 61(4) |

|     |       |       |       |       |        |       |
|-----|-------|-------|-------|-------|--------|-------|
| N1  | 16(4) | 15(4) | 12(3) | -2(3) | 2(3)   | -2(3) |
| N2  | 12(4) | 19(4) | 16(4) | 0(3)  | 4(3)   | 2(3)  |
| N3  | 18(4) | 27(5) | 22(4) | 2(4)  | 3(3)   | -1(4) |
| N4  | 14(4) | 25(5) | 11(3) | -2(3) | 7(3)   | -3(3) |
| N5  | 14(4) | 20(4) | 11(3) | -3(3) | 9(3)   | -6(3) |
| N6  | 24(4) | 15(4) | 20(4) | 4(3)  | -1(3)  | -1(3) |
| C28 | 7(4)  | 7(4)  | 15(4) | -3(3) | 2(3)   | 4(3)  |
| C2  | 9(4)  | 15(5) | 14(4) | -2(4) | 0(3)   | 1(3)  |
| C3  | 19(5) | 15(5) | 23(5) | 2(4)  | 5(4)   | 3(4)  |
| C4  | 20(5) | 19(5) | 22(5) | 2(4)  | -2(4)  | 5(4)  |
| C5  | 20(5) | 18(5) | 14(4) | 8(4)  | 2(4)   | 2(4)  |
| C6  | 13(4) | 24(5) | 24(5) | 3(4)  | 6(4)   | -1(4) |
| C7  | 15(4) | 23(5) | 12(4) | -5(4) | -1(3)  | -2(4) |
| C8  | 18(5) | 18(5) | 17(4) | 1(4)  | 3(4)   | 9(4)  |
| C9  | 22(5) | 11(5) | 21(5) | 1(4)  | 6(4)   | 7(4)  |
| C10 | 24(5) | 13(5) | 29(5) | -4(4) | -10(4) | -1(4) |
| C11 | 24(5) | 13(5) | 32(6) | -6(4) | -3(4)  | -3(4) |
| C12 | 18(5) | 19(5) | 33(6) | 10(4) | 13(4)  | 2(4)  |
| C13 | 18(5) | 24(6) | 19(5) | 4(4)  | 1(4)   | 2(4)  |
| C14 | 7(4)  | 23(5) | 11(4) | 0(4)  | -2(3)  | -7(4) |
| C15 | 19(5) | 18(5) | 17(4) | 0(4)  | 6(4)   | -1(4) |
| C16 | 18(5) | 21(5) | 25(5) | 0(4)  | 4(4)   | 10(4) |
| C17 | 13(4) | 22(5) | 19(4) | 0(4)  | 5(4)   | -1(4) |
| C18 | 13(4) | 26(6) | 17(4) | 0(4)  | -1(4)  | 3(4)  |
| C19 | 19(5) | 10(4) | 16(4) | 0(4)  | 0(4)   | -2(4) |
| C20 | 10(4) | 17(5) | 12(4) | 5(4)  | -5(3)  | 0(4)  |
| C21 | 10(4) | 15(5) | 16(4) | -1(4) | 1(3)   | -7(3) |
| C22 | 11(4) | 27(5) | 17(4) | 5(4)  | 8(4)   | 0(4)  |
| C23 | 14(4) | 20(5) | 12(4) | 1(4)  | 8(3)   | 3(4)  |

|     |       |       |       |        |       |        |
|-----|-------|-------|-------|--------|-------|--------|
| C24 | 16(5) | 28(6) | 17(4) | 2(4)   | 1(4)  | -3(4)  |
| C25 | 9(4)  | 21(5) | 18(4) | 2(4)   | 2(4)  | 0(4)   |
| C26 | 13(4) | 14(5) | 20(4) | 2(4)   | 4(4)  | -1(4)  |
| C27 | 21(5) | 21(5) | 16(4) | -5(4)  | 3(4)  | -7(4)  |
| C1  | 14(4) | 23(5) | 13(4) | 0(4)   | 2(4)  | -1(4)  |
| C29 | 13(4) | 23(5) | 11(4) | -3(4)  | 6(3)  | 0(4)   |
| C30 | 21(5) | 20(5) | 26(5) | 4(4)   | 6(4)  | 4(4)   |
| C31 | 30(5) | 16(5) | 25(5) | 3(4)   | 12(4) | 2(4)   |
| C32 | 10(4) | 28(6) | 16(4) | -2(4)  | 4(4)  | 0(4)   |
| C33 | 21(5) | 23(5) | 18(5) | 4(4)   | 3(4)  | 3(4)   |
| C34 | 24(5) | 22(5) | 18(4) | 0(4)   | 6(4)  | 0(4)   |
| C35 | 14(4) | 18(5) | 17(4) | -1(4)  | 10(4) | 2(4)   |
| C36 | 21(5) | 27(6) | 11(4) | 7(4)   | 6(4)  | 6(4)   |
| C37 | 14(4) | 29(6) | 20(5) | 4(4)   | 3(4)  | 0(4)   |
| C38 | 26(5) | 22(5) | 23(5) | 8(4)   | 9(4)  | 1(4)   |
| C39 | 28(5) | 34(6) | 21(5) | 5(5)   | 8(4)  | 16(5)  |
| C40 | 18(5) | 48(7) | 18(5) | 1(5)   | 0(4)  | 8(5)   |
| C41 | 22(5) | 29(6) | 20(5) | -2(4)  | 4(4)  | 1(4)   |
| C42 | 18(4) | 7(4)  | 20(4) | 0(3)   | 5(4)  | 5(3)   |
| C43 | 17(5) | 26(5) | 20(5) | 6(4)   | 4(4)  | 1(4)   |
| C44 | 24(5) | 32(6) | 22(5) | 7(4)   | -4(4) | -5(4)  |
| C45 | 23(5) | 24(5) | 18(5) | 3(4)   | -9(4) | 7(4)   |
| C46 | 18(4) | 27(6) | 22(4) | 5(4)   | 4(4)  | 2(4)   |
| C47 | 9(4)  | 35(6) | 16(4) | 2(4)   | -2(3) | -3(4)  |
| C48 | 21(5) | 28(6) | 15(4) | -1(4)  | 5(4)  | 4(4)   |
| C49 | 27(5) | 26(6) | 22(5) | 0(4)   | 3(4)  | -1(5)  |
| C50 | 36(6) | 46(7) | 18(5) | -7(5)  | -3(4) | -4(5)  |
| C51 | 42(7) | 40(7) | 31(6) | -17(5) | 3(5)  | -12(5) |
| C52 | 35(6) | 29(6) | 40(6) | 2(5)   | 10(5) | 0(5)   |

|     |       |       |       |       |       |        |
|-----|-------|-------|-------|-------|-------|--------|
| C53 | 23(5) | 30(6) | 23(5) | 0(4)  | 4(4)  | 1(4)   |
| C54 | 33(6) | 22(6) | 27(5) | 0(5)  | 2(5)  | -1(5)  |
| C55 | 28(6) | 33(6) | 23(5) | -5(5) | 3(4)  | -4(5)  |
| C56 | 33(6) | 38(7) | 26(5) | 1(5)  | -2(5) | -15(5) |
| C57 | 28(6) | 28(6) | 42(6) | 7(5)  | 5(5)  | -9(5)  |
| C58 | 24(5) | 33(6) | 27(5) | -6(5) | 0(4)  | -5(5)  |
| C59 | 18(4) | 28(6) | 5(3)  | 4(4)  | -2(3) | -2(4)  |
| C60 | 7(4)  | 26(5) | 16(4) | 2(4)  | 3(3)  | -3(4)  |
| C61 | 12(4) | 26(5) | 20(5) | 4(4)  | 4(4)  | 3(4)   |
| C62 | 19(5) | 16(5) | 23(5) | 4(4)  | 3(4)  | 9(4)   |
| C63 | 16(4) | 29(6) | 18(5) | 10(4) | 0(4)  | 0(4)   |
| C64 | 21(5) | 31(6) | 15(4) | 4(4)  | 3(4)  | 2(4)   |
| C65 | 17(4) | 13(5) | 19(4) | 2(4)  | 2(4)  | 5(4)   |
| C66 | 12(4) | 12(5) | 26(5) | -3(4) | 7(4)  | 1(4)   |
| C67 | 29(5) | 21(5) | 25(5) | 4(4)  | 5(4)  | -2(4)  |
| C68 | 27(5) | 22(5) | 37(6) | 10(5) | 8(5)  | 4(4)   |
| C69 | 25(5) | 19(5) | 40(6) | -2(5) | 0(5)  | -5(4)  |
| C70 | 25(5) | 23(5) | 29(5) | -5(4) | 3(4)  | -7(4)  |
| C71 | 18(4) | 26(5) | 15(4) | 2(4)  | -1(4) | -1(4)  |
| C72 | 22(4) | 16(5) | 15(4) | 3(4)  | 8(4)  | 6(4)   |
| C73 | 13(4) | 20(5) | 16(4) | 1(4)  | 2(4)  | 3(4)   |
| C74 | 21(5) | 27(6) | 19(5) | 5(4)  | 6(4)  | -6(4)  |
| C75 | 16(5) | 29(6) | 23(5) | 8(4)  | 0(4)  | 9(4)   |
| C76 | 27(5) | 15(5) | 22(5) | -1(4) | 6(4)  | 3(4)   |
| C77 | 17(5) | 22(5) | 23(5) | 1(4)  | 4(4)  | -4(4)  |
| C78 | 15(4) | 15(5) | 24(5) | -5(4) | 8(4)  | 1(4)   |
| C79 | 14(4) | 21(5) | 15(4) | 2(4)  | 5(4)  | 1(4)   |
| C80 | 18(4) | 18(5) | 11(4) | -3(4) | 2(4)  | -1(4)  |
| C81 | 16(4) | 17(5) | 9(4)  | -4(4) | 2(3)  | 0(4)   |

|      |       |       |       |        |       |       |
|------|-------|-------|-------|--------|-------|-------|
| C82  | 15(4) | 9(4)  | 25(5) | -1(4)  | 5(4)  | -2(3) |
| C83  | 19(5) | 26(5) | 10(4) | -1(4)  | -3(4) | 3(4)  |
| C84  | 15(4) | 27(5) | 11(4) | -5(4)  | 2(4)  | -1(4) |
| C85  | 29(5) | 16(5) | 15(4) | -1(4)  | 1(4)  | 3(4)  |
| C86  | 8(4)  | 23(5) | 11(4) | 4(4)   | 2(3)  | 3(4)  |
| C87  | 21(5) | 18(5) | 15(4) | 3(4)   | 8(4)  | 0(4)  |
| C88  | 29(5) | 12(5) | 16(4) | 5(4)   | 4(4)  | -2(4) |
| C89  | 20(5) | 17(5) | 18(4) | -1(4)  | 9(4)  | 5(4)  |
| C90  | 19(5) | 16(5) | 13(4) | 0(4)   | 0(4)  | -2(4) |
| C91  | 29(5) | 16(5) | 19(4) | -2(4)  | 15(4) | 0(4)  |
| C92  | 25(5) | 11(5) | 19(4) | -7(4)  | 7(4)  | 0(4)  |
| C93  | 14(4) | 20(5) | 13(4) | 0(4)   | 4(4)  | 5(4)  |
| C94  | 16(4) | 20(5) | 12(4) | -3(4)  | 4(4)  | -7(4) |
| C95  | 34(6) | 22(6) | 22(5) | -5(4)  | 7(5)  | -6(5) |
| C96  | 34(6) | 29(6) | 22(5) | -10(5) | 0(4)  | 2(5)  |
| C97  | 30(6) | 20(5) | 39(6) | -10(5) | 10(5) | -4(4) |
| C98  | 34(6) | 15(5) | 29(5) | -1(4)  | 7(5)  | -3(4) |
| C99  | 22(5) | 24(5) | 14(4) | 1(4)   | 2(4)  | 4(4)  |
| C100 | 18(5) | 23(5) | 10(4) | 0(4)   | 0(4)  | 0(4)  |
| C101 | 19(4) | 27(6) | 18(4) | 3(4)   | 9(4)  | 2(4)  |
| C102 | 27(5) | 33(6) | 18(4) | 6(5)   | 12(4) | 4(5)  |
| C103 | 28(5) | 30(6) | 16(4) | -3(4)  | 0(4)  | 6(4)  |
| C104 | 18(5) | 31(6) | 29(5) | 0(5)   | -1(4) | -1(4) |
| C105 | 15(4) | 25(5) | 21(5) | 2(4)   | 3(4)  | -1(4) |
| C106 | 16(4) | 21(5) | 12(4) | 1(4)   | 4(4)  | -2(4) |
| C107 | 13(4) | 17(5) | 21(5) | 0(4)   | 6(4)  | 3(4)  |
| C108 | 25(5) | 24(5) | 15(4) | -1(4)  | 10(4) | 3(4)  |
| C109 | 26(5) | 26(6) | 13(4) | 1(4)   | 5(4)  | 5(4)  |
| C110 | 14(4) | 29(6) | 17(4) | 7(4)   | -2(4) | 2(4)  |

|      |        |         |         |         |        |        |
|------|--------|---------|---------|---------|--------|--------|
| C111 | 21(5)  | 27(6)   | 10(4)   | 2(4)    | 0(4)   | -7(4)  |
| C112 | 55(7)  | 11(5)   | 29(6)   | -2(4)   | 11(5)  | -8(5)  |
| C113 | 29(5)  | 20(5)   | 21(5)   | 1(4)    | 3(4)   | -5(4)  |
| C114 | 17(5)  | 29(6)   | 32(6)   | 9(5)    | 7(4)   | -6(4)  |
| C115 | 25(6)  | 23(6)   | 38(6)   | 2(5)    | -1(5)  | -7(5)  |
| C116 | 40(7)  | 27(6)   | 37(6)   | 0(5)    | 3(5)   | -19(5) |
| C117 | 45(8)  | 79(12)  | 110(13) | 44(10)  | 34(9)  | 30(8)  |
| C118 | 63(11) | 190(20) | 160(20) | 117(19) | 51(13) | 53(13) |

**Table S11.** Bond Lengths for Complex **5**.

| Atom | Atom | Length/Å  | Atom | Atom | Length/Å  |
|------|------|-----------|------|------|-----------|
| Pd1  | C1   | 1.959(10) | C50  | H50  | 0.9500    |
| Pd1  | N3   | 2.110(8)  | C51  | C52  | 1.373(15) |
| Pd1  | Cl2  | 2.323(2)  | C51  | H51  | 0.9500    |
| Pd1  | Cl1  | 2.329(2)  | C52  | C53  | 1.398(15) |
| Pd2  | C86  | 1.956(9)  | C52  | H52  | 0.9500    |
| Pd2  | N6   | 2.103(8)  | C53  | H53  | 0.9500    |
| Pd2  | Cl5  | 2.318(2)  | C54  | C55  | 1.390(15) |
| Pd2  | Cl4  | 2.320(2)  | C54  | H54  | 0.9500    |
| Cl3  | C55  | 1.764(11) | C55  | C56  | 1.391(14) |
| Cl6  | C112 | 1.806(10) | C56  | C57  | 1.343(15) |
| Cl7  | C117 | 1.786(17) | C56  | H56  | 0.9500    |
| Cl8  | C117 | 1.701(19) | C57  | C58  | 1.369(14) |
| Cl9  | C118 | 1.719(19) | C57  | H57  | 0.9500    |
| Cl10 | C118 | 1.732(16) | C58  | H58  | 0.9500    |
| N1   | C1   | 1.337(11) | C59  | C72  | 1.540(12) |
| N1   | C26  | 1.390(11) | C59  | C78  | 1.542(12) |
| N1   | C23  | 1.430(10) | C59  | C60  | 1.541(12) |



|     |      |           |     |     |           |
|-----|------|-----------|-----|-----|-----------|
| N2  | C1   | 1.347(11) | C59 | C66 | 1.547(13) |
| N2  | C27  | 1.398(11) | C60 | C65 | 1.400(12) |
| N2  | C29  | 1.435(10) | C60 | C61 | 1.411(13) |
| N3  | C54  | 1.311(13) | C61 | C62 | 1.377(13) |
| N3  | C58  | 1.351(12) | C61 | H61 | 0.9500    |
| N4  | C86  | 1.342(11) | C62 | C63 | 1.373(12) |
| N4  | C84  | 1.382(12) | C62 | H62 | 0.9500    |
| N4  | C81  | 1.443(10) | C63 | C64 | 1.378(14) |
| N5  | C86  | 1.352(11) | C63 | H63 | 0.9500    |
| N5  | C85  | 1.376(12) | C64 | C65 | 1.374(12) |
| N5  | C87  | 1.433(10) | C64 | H64 | 0.9500    |
| N6  | C114 | 1.335(12) | C65 | H65 | 0.9500    |
| N6  | C113 | 1.360(12) | C66 | C71 | 1.367(13) |
| C28 | C2   | 1.530(12) | C66 | C67 | 1.409(13) |
| C28 | C14  | 1.536(11) | C67 | C68 | 1.403(14) |
| C28 | C20  | 1.545(11) | C67 | H67 | 0.9500    |
| C28 | C8   | 1.548(13) | C68 | C69 | 1.372(14) |
| C2  | C3   | 1.391(12) | C68 | H68 | 0.9500    |
| C2  | C7   | 1.401(11) | C69 | C70 | 1.372(14) |
| C3  | C4   | 1.379(13) | C69 | H69 | 0.9500    |
| C3  | H3   | 0.9500    | C70 | C71 | 1.414(13) |
| C4  | C5   | 1.364(12) | C70 | H70 | 0.9500    |
| C4  | H4   | 0.9500    | C71 | H71 | 0.9500    |
| C5  | C6   | 1.394(13) | C72 | C77 | 1.385(13) |
| C5  | H5   | 0.9500    | C72 | C73 | 1.414(13) |
| C6  | C7   | 1.390(13) | C73 | C74 | 1.382(12) |
| C6  | H6   | 0.9500    | C73 | H73 | 0.9500    |
| C7  | H7   | 0.9500    | C74 | C75 | 1.399(13) |
| C8  | C13  | 1.399(13) | C74 | H74 | 0.9500    |

|     |     |           |     |     |           |
|-----|-----|-----------|-----|-----|-----------|
| C8  | C9  | 1.407(13) | C75 | C76 | 1.352(14) |
| C9  | C10 | 1.392(13) | C75 | H75 | 0.9500    |
| C9  | H9  | 0.9500    | C76 | C77 | 1.391(13) |
| C10 | C11 | 1.377(14) | C76 | H76 | 0.9500    |
| C10 | H10 | 0.9500    | C77 | H77 | 0.9500    |
| C11 | C12 | 1.387(14) | C78 | C79 | 1.374(13) |
| C11 | H11 | 0.9500    | C78 | C83 | 1.419(12) |
| C12 | C13 | 1.394(14) | C79 | C80 | 1.409(11) |
| C12 | H12 | 0.9500    | C79 | H79 | 0.9500    |
| C13 | H13 | 0.9500    | C80 | C81 | 1.374(12) |
| C14 | C19 | 1.393(12) | C80 | H80 | 0.9500    |
| C14 | C15 | 1.400(13) | C81 | C82 | 1.365(12) |
| C15 | C16 | 1.382(12) | C82 | C83 | 1.400(12) |
| C15 | H15 | 0.9500    | C82 | H82 | 0.9500    |
| C16 | C17 | 1.383(13) | C83 | H83 | 0.9500    |
| C16 | H16 | 0.9500    | C84 | C85 | 1.330(11) |
| C17 | C18 | 1.394(13) | C84 | H84 | 0.9500    |
| C17 | H17 | 0.9500    | C85 | H85 | 0.9500    |
| C18 | C19 | 1.375(12) | C87 | C88 | 1.376(12) |
| C18 | H18 | 0.9500    | C87 | C92 | 1.385(12) |
| C19 | H19 | 0.9500    | C88 | C89 | 1.406(12) |
| C20 | C25 | 1.388(12) | C88 | H88 | 0.9500    |
| C20 | C21 | 1.403(11) | C89 | C90 | 1.384(13) |
| C21 | C22 | 1.372(11) | C89 | H89 | 0.9500    |
| C21 | H21 | 0.9500    | C90 | C91 | 1.392(13) |
| C22 | C23 | 1.391(12) | C90 | C93 | 1.532(12) |
| C22 | H22 | 0.9500    | C91 | C92 | 1.397(11) |
| C23 | C24 | 1.374(12) | C91 | H91 | 0.9500    |
| C24 | C25 | 1.390(12) | C92 | H92 | 0.9500    |

|     |     |           |      |      |           |
|-----|-----|-----------|------|------|-----------|
| C24 | H24 | 0.9500    | C93  | C94  | 1.539(13) |
| C25 | H25 | 0.9500    | C93  | C106 | 1.556(13) |
| C26 | C27 | 1.324(12) | C93  | C100 | 1.559(12) |
| C26 | H26 | 0.9500    | C94  | C99  | 1.389(14) |
| C27 | H27 | 0.9500    | C94  | C95  | 1.407(13) |
| C29 | C30 | 1.362(13) | C95  | C96  | 1.391(15) |
| C29 | C34 | 1.376(12) | C95  | H95  | 0.9500    |
| C30 | C31 | 1.379(12) | C96  | C97  | 1.379(15) |
| C30 | H30 | 0.9500    | C96  | H96  | 0.9500    |
| C31 | C32 | 1.404(13) | C97  | C98  | 1.379(14) |
| C31 | H31 | 0.9500    | C97  | H97  | 0.9500    |
| C32 | C33 | 1.379(14) | C98  | C99  | 1.405(14) |
| C32 | C35 | 1.554(12) | C98  | H98  | 0.9500    |
| C33 | C34 | 1.407(12) | C99  | H99  | 0.9500    |
| C33 | H33 | 0.9500    | C100 | C105 | 1.384(12) |
| C34 | H34 | 0.9500    | C100 | C101 | 1.403(11) |
| C35 | C48 | 1.518(13) | C101 | C102 | 1.368(12) |
| C35 | C36 | 1.533(12) | C101 | H101 | 0.9500    |
| C35 | C42 | 1.540(13) | C102 | C103 | 1.400(13) |
| C36 | C41 | 1.398(13) | C102 | H102 | 0.9500    |
| C36 | C37 | 1.405(14) | C103 | C104 | 1.365(13) |
| C37 | C38 | 1.383(13) | C103 | H103 | 0.9500    |
| C37 | H37 | 0.9500    | C104 | C105 | 1.383(13) |
| C38 | C39 | 1.414(14) | C104 | H104 | 0.9500    |
| C38 | H38 | 0.9500    | C105 | H105 | 0.9500    |
| C39 | C40 | 1.369(16) | C106 | C111 | 1.396(12) |
| C39 | H39 | 0.9500    | C106 | C107 | 1.399(13) |
| C40 | C41 | 1.388(14) | C107 | C108 | 1.375(12) |
| C40 | H40 | 0.9500    | C107 | H107 | 0.9500    |

|     |     |           |      |      |           |
|-----|-----|-----------|------|------|-----------|
| C41 | H41 | 0.9500    | C108 | C109 | 1.362(13) |
| C42 | C43 | 1.396(13) | C108 | H108 | 0.9500    |
| C42 | C47 | 1.419(12) | C109 | C110 | 1.366(14) |
| C43 | C44 | 1.412(13) | C109 | H109 | 0.9500    |
| C43 | H43 | 0.9500    | C110 | C111 | 1.384(13) |
| C44 | C45 | 1.375(13) | C110 | H110 | 0.9500    |
| C44 | H44 | 0.9500    | C111 | H111 | 0.9500    |
| C45 | C46 | 1.378(13) | C112 | C116 | 1.406(15) |
| C45 | H45 | 0.9500    | C113 | H113 | 0.9500    |
| C46 | C47 | 1.367(12) | C114 | C115 | 1.382(14) |
| C46 | H46 | 0.9500    | C114 | H114 | 0.9500    |
| C47 | H47 | 0.9500    | C115 | H115 | 0.9500    |
| C48 | C49 | 1.403(13) | C116 | H116 | 0.9500    |
| C48 | C53 | 1.421(14) | C117 | H11A | 0.9900    |
| C49 | C50 | 1.360(15) | C117 | H11B | 0.9900    |
| C49 | H49 | 0.9500    | C118 | H11C | 0.9900    |
| C50 | C51 | 1.385(16) | C118 | H11D | 0.9900    |

**Table S12.** Bond Angles for Complex **5**

| Atom | Atom | Atom | Angle/°   | Atom | Atom | Atom | Angle/°   |
|------|------|------|-----------|------|------|------|-----------|
| C1   | Pd1  | N3   | 178.2(3)  | C57  | C56  | H56  | 120.6     |
| C1   | Pd1  | Cl2  | 87.6(3)   | C55  | C56  | H56  | 120.6     |
| N3   | Pd1  | Cl2  | 91.7(2)   | C56  | C57  | C58  | 120.2(10) |
| C1   | Pd1  | Cl1  | 88.6(3)   | C56  | C57  | H57  | 119.9     |
| N3   | Pd1  | Cl1  | 92.2(2)   | C58  | C57  | H57  | 119.9     |
| Cl2  | Pd1  | Cl1  | 175.72(9) | N3   | C58  | C57  | 121.3(10) |
| C86  | Pd2  | N6   | 176.6(3)  | N3   | C58  | H58  | 119.3     |
| C86  | Pd2  | Cl5  | 87.8(3)   | C57  | C58  | H58  | 119.3     |

|      |     |      |           |     |     |     |           |
|------|-----|------|-----------|-----|-----|-----|-----------|
| N6   | Pd2 | C15  | 93.5(2)   | C72 | C59 | C78 | 111.3(7)  |
| C86  | Pd2 | C14  | 87.0(3)   | C72 | C59 | C60 | 106.5(7)  |
| N6   | Pd2 | C14  | 92.0(2)   | C78 | C59 | C60 | 112.0(8)  |
| C15  | Pd2 | C14  | 172.95(9) | C72 | C59 | C66 | 110.2(8)  |
| C1   | N1  | C26  | 110.2(7)  | C78 | C59 | C66 | 106.0(7)  |
| C1   | N1  | C23  | 124.9(8)  | C60 | C59 | C66 | 110.8(7)  |
| C26  | N1  | C23  | 124.9(7)  | C65 | C60 | C61 | 116.1(8)  |
| C1   | N2  | C27  | 109.5(7)  | C65 | C60 | C59 | 120.2(8)  |
| C1   | N2  | C29  | 123.9(8)  | C61 | C60 | C59 | 123.5(8)  |
| C27  | N2  | C29  | 126.5(7)  | C62 | C61 | C60 | 120.9(8)  |
| C54  | N3  | C58  | 119.4(9)  | C62 | C61 | H61 | 119.5     |
| C54  | N3  | Pd1  | 120.8(7)  | C60 | C61 | H61 | 119.5     |
| C58  | N3  | Pd1  | 119.8(7)  | C63 | C62 | C61 | 121.3(9)  |
| C86  | N4  | C84  | 110.6(7)  | C63 | C62 | H62 | 119.4     |
| C86  | N4  | C81  | 123.6(8)  | C61 | C62 | H62 | 119.4     |
| C84  | N4  | C81  | 125.8(7)  | C62 | C63 | C64 | 119.1(9)  |
| C86  | N5  | C85  | 109.0(7)  | C62 | C63 | H63 | 120.5     |
| C86  | N5  | C87  | 124.4(7)  | C64 | C63 | H63 | 120.5     |
| C85  | N5  | C87  | 126.6(7)  | C65 | C64 | C63 | 120.2(8)  |
| C114 | N6  | C113 | 118.7(9)  | C65 | C64 | H64 | 119.9     |
| C114 | N6  | Pd2  | 120.2(7)  | C63 | C64 | H64 | 119.9     |
| C113 | N6  | Pd2  | 121.1(6)  | C64 | C65 | C60 | 122.3(9)  |
| C2   | C28 | C14  | 107.0(6)  | C64 | C65 | H65 | 118.9     |
| C2   | C28 | C20  | 111.4(7)  | C60 | C65 | H65 | 118.9     |
| C14  | C28 | C20  | 109.6(7)  | C71 | C66 | C67 | 118.0(9)  |
| C2   | C28 | C8   | 112.4(7)  | C71 | C66 | C59 | 124.2(8)  |
| C14  | C28 | C8   | 111.7(7)  | C67 | C66 | C59 | 117.8(8)  |
| C20  | C28 | C8   | 104.8(6)  | C68 | C67 | C66 | 120.9(10) |
| C3   | C2  | C7   | 116.9(8)  | C68 | C67 | H67 | 119.5     |

|     |     |     |          |     |     |     |           |
|-----|-----|-----|----------|-----|-----|-----|-----------|
| C3  | C2  | C28 | 124.7(7) | C66 | C67 | H67 | 119.5     |
| C7  | C2  | C28 | 118.5(8) | C69 | C68 | C67 | 119.5(10) |
| C4  | C3  | C2  | 120.5(8) | C69 | C68 | H68 | 120.2     |
| C4  | C3  | H3  | 119.7    | C67 | C68 | H68 | 120.2     |
| C2  | C3  | H3  | 119.7    | C70 | C69 | C68 | 120.5(10) |
| C5  | C4  | C3  | 122.9(9) | C70 | C69 | H69 | 119.7     |
| C5  | C4  | H4  | 118.6    | C68 | C69 | H69 | 119.7     |
| C3  | C4  | H4  | 118.6    | C69 | C70 | C71 | 119.8(9)  |
| C4  | C5  | C6  | 117.8(8) | C69 | C70 | H70 | 120.1     |
| C4  | C5  | H5  | 121.1    | C71 | C70 | H70 | 120.1     |
| C6  | C5  | H5  | 121.1    | C66 | C71 | C70 | 121.2(9)  |
| C7  | C6  | C5  | 119.9(8) | C66 | C71 | H71 | 119.4     |
| C7  | C6  | H6  | 120.0    | C70 | C71 | H71 | 119.4     |
| C5  | C6  | H6  | 120.0    | C77 | C72 | C73 | 118.7(8)  |
| C6  | C7  | C2  | 121.9(9) | C77 | C72 | C59 | 123.0(9)  |
| C6  | C7  | H7  | 119.0    | C73 | C72 | C59 | 118.3(8)  |
| C2  | C7  | H7  | 119.0    | C74 | C73 | C72 | 119.9(9)  |
| C13 | C8  | C9  | 117.2(9) | C74 | C73 | H73 | 120.1     |
| C13 | C8  | C28 | 120.6(8) | C72 | C73 | H73 | 120.1     |
| C9  | C8  | C28 | 122.1(8) | C73 | C74 | C75 | 120.0(9)  |
| C10 | C9  | C8  | 121.6(9) | C73 | C74 | H74 | 120.0     |
| C10 | C9  | H9  | 119.2    | C75 | C74 | H74 | 120.0     |
| C8  | C9  | H9  | 119.2    | C76 | C75 | C74 | 120.2(9)  |
| C11 | C10 | C9  | 120.0(9) | C76 | C75 | H75 | 119.9     |
| C11 | C10 | H10 | 120.0    | C74 | C75 | H75 | 119.9     |
| C9  | C10 | H10 | 120.0    | C75 | C76 | C77 | 120.8(9)  |
| C10 | C11 | C12 | 119.8(9) | C75 | C76 | H76 | 119.6     |
| C10 | C11 | H11 | 120.1    | C77 | C76 | H76 | 119.6     |
| C12 | C11 | H11 | 120.1    | C72 | C77 | C76 | 120.4(9)  |

|     |     |     |          |     |     |     |          |
|-----|-----|-----|----------|-----|-----|-----|----------|
| C11 | C12 | C13 | 120.4(9) | C72 | C77 | H77 | 119.8    |
| C11 | C12 | H12 | 119.8    | C76 | C77 | H77 | 119.8    |
| C13 | C12 | H12 | 119.8    | C79 | C78 | C83 | 118.2(8) |
| C12 | C13 | C8  | 121.0(9) | C79 | C78 | C59 | 124.9(8) |
| C12 | C13 | H13 | 119.5    | C83 | C78 | C59 | 116.8(8) |
| C8  | C13 | H13 | 119.5    | C78 | C79 | C80 | 121.1(8) |
| C19 | C14 | C15 | 116.4(8) | C78 | C79 | H79 | 119.4    |
| C19 | C14 | C28 | 119.5(8) | C80 | C79 | H79 | 119.4    |
| C15 | C14 | C28 | 124.1(8) | C81 | C80 | C79 | 118.9(8) |
| C16 | C15 | C14 | 121.3(9) | C81 | C80 | H80 | 120.5    |
| C16 | C15 | H15 | 119.4    | C79 | C80 | H80 | 120.5    |
| C14 | C15 | H15 | 119.4    | C82 | C81 | C80 | 122.1(8) |
| C15 | C16 | C17 | 121.1(9) | C82 | C81 | N4  | 119.9(7) |
| C15 | C16 | H16 | 119.5    | C80 | C81 | N4  | 117.9(8) |
| C17 | C16 | H16 | 119.5    | C81 | C82 | C83 | 118.9(8) |
| C16 | C17 | C18 | 118.5(8) | C81 | C82 | H82 | 120.6    |
| C16 | C17 | H17 | 120.7    | C83 | C82 | H82 | 120.6    |
| C18 | C17 | H17 | 120.7    | C82 | C83 | C78 | 120.6(9) |
| C19 | C18 | C17 | 119.9(9) | C82 | C83 | H83 | 119.7    |
| C19 | C18 | H18 | 120.1    | C78 | C83 | H83 | 119.7    |
| C17 | C18 | H18 | 120.1    | C85 | C84 | N4  | 106.0(8) |
| C18 | C19 | C14 | 122.8(9) | C85 | C84 | H84 | 127.0    |
| C18 | C19 | H19 | 118.6    | N4  | C84 | H84 | 127.0    |
| C14 | C19 | H19 | 118.6    | C84 | C85 | N5  | 108.5(8) |
| C25 | C20 | C21 | 117.1(8) | C84 | C85 | H85 | 125.7    |
| C25 | C20 | C28 | 124.5(7) | N5  | C85 | H85 | 125.7    |
| C21 | C20 | C28 | 118.3(7) | N4  | C86 | N5  | 105.8(8) |
| C22 | C21 | C20 | 122.1(8) | N4  | C86 | Pd2 | 129.2(6) |
| C22 | C21 | H21 | 118.9    | N5  | C86 | Pd2 | 125.0(6) |

|     |     |     |          |      |     |      |           |
|-----|-----|-----|----------|------|-----|------|-----------|
| C20 | C21 | H21 | 118.9    | C88  | C87 | C92  | 121.2(8)  |
| C21 | C22 | C23 | 119.4(8) | C88  | C87 | N5   | 118.8(8)  |
| C21 | C22 | H22 | 120.3    | C92  | C87 | N5   | 120.0(8)  |
| C23 | C22 | H22 | 120.3    | C87  | C88 | C89  | 118.7(8)  |
| C24 | C23 | C22 | 120.0(8) | C87  | C88 | H88  | 120.6     |
| C24 | C23 | N1  | 119.7(8) | C89  | C88 | H88  | 120.6     |
| C22 | C23 | N1  | 120.3(7) | C90  | C89 | C88  | 122.0(8)  |
| C23 | C24 | C25 | 120.1(9) | C90  | C89 | H89  | 119.0     |
| C23 | C24 | H24 | 119.9    | C88  | C89 | H89  | 119.0     |
| C25 | C24 | H24 | 119.9    | C89  | C90 | C91  | 117.3(8)  |
| C20 | C25 | C24 | 121.3(8) | C89  | C90 | C93  | 124.0(8)  |
| C20 | C25 | H25 | 119.4    | C91  | C90 | C93  | 118.7(8)  |
| C24 | C25 | H25 | 119.4    | C90  | C91 | C92  | 122.1(9)  |
| C27 | C26 | N1  | 107.1(8) | C90  | C91 | H91  | 119.0     |
| C27 | C26 | H26 | 126.4    | C92  | C91 | H91  | 119.0     |
| N1  | C26 | H26 | 126.4    | C87  | C92 | C91  | 118.7(8)  |
| C26 | C27 | N2  | 107.1(8) | C87  | C92 | H92  | 120.6     |
| C26 | C27 | H27 | 126.5    | C91  | C92 | H92  | 120.6     |
| N2  | C27 | H27 | 126.5    | C90  | C93 | C94  | 107.3(7)  |
| N1  | C1  | N2  | 106.1(8) | C90  | C93 | C106 | 112.5(8)  |
| N1  | C1  | Pd1 | 130.0(6) | C94  | C93 | C106 | 110.4(7)  |
| N2  | C1  | Pd1 | 123.9(6) | C90  | C93 | C100 | 110.4(7)  |
| C30 | C29 | C34 | 121.5(8) | C94  | C93 | C100 | 112.5(7)  |
| C30 | C29 | N2  | 118.7(8) | C106 | C93 | C100 | 103.8(7)  |
| C34 | C29 | N2  | 119.7(8) | C99  | C94 | C95  | 117.0(9)  |
| C29 | C30 | C31 | 119.5(9) | C99  | C94 | C93  | 124.5(8)  |
| C29 | C30 | H30 | 120.3    | C95  | C94 | C93  | 118.5(9)  |
| C31 | C30 | H30 | 120.3    | C96  | C95 | C94  | 122.4(10) |
| C30 | C31 | C32 | 121.7(9) | C96  | C95 | H95  | 118.8     |



|     |     |     |           |      |      |      |           |
|-----|-----|-----|-----------|------|------|------|-----------|
| C30 | C31 | H31 | 119.2     | C94  | C95  | H95  | 118.8     |
| C32 | C31 | H31 | 119.2     | C97  | C96  | C95  | 118.9(10) |
| C33 | C32 | C31 | 117.1(8)  | C97  | C96  | H96  | 120.5     |
| C33 | C32 | C35 | 125.5(8)  | C95  | C96  | H96  | 120.5     |
| C31 | C32 | C35 | 117.4(9)  | C96  | C97  | C98  | 120.4(10) |
| C32 | C33 | C34 | 121.8(9)  | C96  | C97  | H97  | 119.8     |
| C32 | C33 | H33 | 119.1     | C98  | C97  | H97  | 119.8     |
| C34 | C33 | H33 | 119.1     | C97  | C98  | C99  | 120.3(10) |
| C29 | C34 | C33 | 118.3(9)  | C97  | C98  | H98  | 119.8     |
| C29 | C34 | H34 | 120.8     | C99  | C98  | H98  | 119.8     |
| C33 | C34 | H34 | 120.8     | C94  | C99  | C98  | 120.8(9)  |
| C48 | C35 | C36 | 112.9(8)  | C94  | C99  | H99  | 119.6     |
| C48 | C35 | C42 | 113.0(7)  | C98  | C99  | H99  | 119.6     |
| C36 | C35 | C42 | 104.8(7)  | C105 | C100 | C101 | 117.6(8)  |
| C48 | C35 | C32 | 104.9(7)  | C105 | C100 | C93  | 123.4(8)  |
| C36 | C35 | C32 | 111.9(8)  | C101 | C100 | C93  | 119.0(8)  |
| C42 | C35 | C32 | 109.5(7)  | C102 | C101 | C100 | 120.8(8)  |
| C41 | C36 | C37 | 116.4(9)  | C102 | C101 | H101 | 119.6     |
| C41 | C36 | C35 | 123.8(9)  | C100 | C101 | H101 | 119.6     |
| C37 | C36 | C35 | 119.6(8)  | C101 | C102 | C103 | 120.7(8)  |
| C38 | C37 | C36 | 123.2(9)  | C101 | C102 | H102 | 119.7     |
| C38 | C37 | H37 | 118.4     | C103 | C102 | H102 | 119.7     |
| C36 | C37 | H37 | 118.4     | C104 | C103 | C102 | 118.7(9)  |
| C37 | C38 | C39 | 118.1(10) | C104 | C103 | H103 | 120.6     |
| C37 | C38 | H38 | 121.0     | C102 | C103 | H103 | 120.6     |
| C39 | C38 | H38 | 121.0     | C103 | C104 | C105 | 120.8(9)  |
| C40 | C39 | C38 | 119.9(9)  | C103 | C104 | H104 | 119.6     |
| C40 | C39 | H39 | 120.0     | C105 | C104 | H104 | 119.6     |
| C38 | C39 | H39 | 120.0     | C104 | C105 | C100 | 121.3(8)  |

|     |     |     |           |      |      |      |           |
|-----|-----|-----|-----------|------|------|------|-----------|
| C39 | C40 | C41 | 120.8(10) | C104 | C105 | H105 | 119.4     |
| C39 | C40 | H40 | 119.6     | C100 | C105 | H105 | 119.4     |
| C41 | C40 | H40 | 119.6     | C111 | C106 | C107 | 117.8(9)  |
| C40 | C41 | C36 | 121.5(10) | C111 | C106 | C93  | 123.7(9)  |
| C40 | C41 | H41 | 119.3     | C107 | C106 | C93  | 118.4(8)  |
| C36 | C41 | H41 | 119.3     | C108 | C107 | C106 | 119.9(9)  |
| C43 | C42 | C47 | 116.0(8)  | C108 | C107 | H107 | 120.0     |
| C43 | C42 | C35 | 123.3(8)  | C106 | C107 | H107 | 120.0     |
| C47 | C42 | C35 | 120.0(7)  | C109 | C108 | C107 | 122.3(10) |
| C42 | C43 | C44 | 121.7(8)  | C109 | C108 | H108 | 118.9     |
| C42 | C43 | H43 | 119.2     | C107 | C108 | H108 | 118.9     |
| C44 | C43 | H43 | 119.2     | C108 | C109 | C110 | 118.1(9)  |
| C45 | C44 | C43 | 119.2(9)  | C108 | C109 | H109 | 120.9     |
| C45 | C44 | H44 | 120.4     | C110 | C109 | H109 | 120.9     |
| C43 | C44 | H44 | 120.4     | C109 | C110 | C111 | 121.8(9)  |
| C44 | C45 | C46 | 120.7(9)  | C109 | C110 | H110 | 119.1     |
| C44 | C45 | H45 | 119.7     | C111 | C110 | H110 | 119.1     |
| C46 | C45 | H45 | 119.7     | C110 | C111 | C106 | 119.9(9)  |
| C47 | C46 | C45 | 119.8(8)  | C110 | C111 | H111 | 120.0     |
| C47 | C46 | H46 | 120.1     | C106 | C111 | H111 | 120.0     |
| C45 | C46 | H46 | 120.1     | C113 | C112 | C116 | 121.3(10) |
| C46 | C47 | C42 | 122.6(8)  | C113 | C112 | Cl6  | 119.7(8)  |
| C46 | C47 | H47 | 118.7     | C116 | C112 | Cl6  | 119.0(8)  |
| C42 | C47 | H47 | 118.7     | N6   | C113 | C112 | 121.0(9)  |
| C49 | C48 | C53 | 115.5(10) | N6   | C113 | H113 | 119.5     |
| C49 | C48 | C35 | 121.0(9)  | C112 | C113 | H113 | 119.5     |
| C53 | C48 | C35 | 123.3(8)  | N6   | C114 | C115 | 122.3(10) |
| C50 | C49 | C48 | 123.4(10) | N6   | C114 | H114 | 118.8     |
| C50 | C49 | H49 | 118.3     | C115 | C114 | H114 | 118.8     |

|     |     |     |           |      |      |      |           |
|-----|-----|-----|-----------|------|------|------|-----------|
| C48 | C49 | H49 | 118.3     | C116 | C115 | C114 | 120.4(10) |
| C49 | C50 | C51 | 120.5(10) | C116 | C115 | H115 | 119.8     |
| C49 | C50 | H50 | 119.8     | C114 | C115 | H115 | 119.8     |
| C51 | C50 | H50 | 119.8     | C115 | C116 | C112 | 116.3(10) |
| C52 | C51 | C50 | 118.7(10) | C115 | C116 | H116 | 121.9     |
| C52 | C51 | H51 | 120.6     | C112 | C116 | H116 | 121.9     |
| C50 | C51 | H51 | 120.6     | C18  | C117 | C17  | 112.1(9)  |
| C51 | C52 | C53 | 121.4(11) | C18  | C117 | H11A | 109.2     |
| C51 | C52 | H52 | 119.3     | C17  | C117 | H11A | 109.2     |
| C53 | C52 | H52 | 119.3     | C18  | C117 | H11B | 109.2     |
| C52 | C53 | C48 | 120.5(9)  | C17  | C117 | H11B | 109.2     |
| C52 | C53 | H53 | 119.7     | H11A | C117 | H11B | 107.9     |
| C48 | C53 | H53 | 119.7     | C19  | C118 | C110 | 114.3(10) |
| N3  | C54 | C55 | 121.5(10) | C19  | C118 | H11C | 108.7     |
| N3  | C54 | H54 | 119.2     | C110 | C118 | H11C | 108.7     |
| C55 | C54 | H54 | 119.2     | C19  | C118 | H11D | 108.7     |
| C54 | C55 | C56 | 118.8(10) | C110 | C118 | H11D | 108.7     |
| C54 | C55 | C13 | 117.9(8)  | H11C | C118 | H11D | 107.6     |

**Table S13.** Torsion Angles for Complex **5**.

| A   | B   | C  | D  | Angle/°   | A   | B   | C   | D   | Angle/°  |
|-----|-----|----|----|-----------|-----|-----|-----|-----|----------|
| C14 | C28 | C2 | C3 | 130.1(9)  | C56 | C57 | C58 | N3  | 0.3(17)  |
| C20 | C28 | C2 | C3 | 10.4(12)  | C72 | C59 | C60 | C65 | 45.9(11) |
| C8  | C28 | C2 | C3 | 106.9(10) | C78 | C59 | C60 | C65 | 167.9(8) |
| C14 | C28 | C2 | C7 | 50.7(10)  | C66 | C59 | C60 | C65 | 73.9(10) |
| C20 | C28 | C2 | C7 | 170.4(8)  | C72 | C59 | C60 | C61 | 129.4(9) |
| C8  | C28 | C2 | C7 | 72.3(10)  | C78 | C59 | C60 | C61 | 7.4(12)  |
| C7  | C2  | C3 | C4 | 1.7(13)   | C66 | C59 | C60 | C61 | 110.8(9) |

|     |     |     |     |          |     |     |     |     |           |
|-----|-----|-----|-----|----------|-----|-----|-----|-----|-----------|
| C28 | C2  | C3  | C4  | 179.1(8) | C65 | C60 | C61 | C62 | 1.7(13)   |
| C2  | C3  | C4  | C5  | 0.9(15)  | C59 | C60 | C61 | C62 | 177.2(8)  |
| C3  | C4  | C5  | C6  | 1.1(15)  | C60 | C61 | C62 | C63 | 0.3(15)   |
| C4  | C5  | C6  | C7  | 2.3(14)  | C61 | C62 | C63 | C64 | 1.4(15)   |
| C5  | C6  | C7  | C2  | 1.5(14)  | C62 | C63 | C64 | C65 | 1.6(15)   |
| C3  | C2  | C7  | C6  | 0.4(13)  | C63 | C64 | C65 | C60 | 0.1(15)   |
| C28 | C2  | C7  | C6  | 179.7(8) | C61 | C60 | C65 | C64 | 1.5(13)   |
| C2  | C28 | C8  | C13 | 167.3(8) | C59 | C60 | C65 | C64 | 177.2(8)  |
| C14 | C28 | C8  | C13 | 72.3(10) | C72 | C59 | C66 | C71 | 102.0(10) |
| C20 | C28 | C8  | C13 | 46.2(10) | C78 | C59 | C66 | C71 | 137.4(9)  |
| C2  | C28 | C8  | C9  | 9.8(11)  | C60 | C59 | C66 | C71 | 15.6(12)  |
| C14 | C28 | C8  | C9  | 110.5(9) | C72 | C59 | C66 | C67 | 78.7(9)   |
| C20 | C28 | C8  | C9  | 130.9(8) | C78 | C59 | C66 | C67 | 41.9(10)  |
| C13 | C8  | C9  | C10 | 1.3(13)  | C60 | C59 | C66 | C67 | 163.7(8)  |
| C28 | C8  | C9  | C10 | 175.9(8) | C71 | C66 | C67 | C68 | 1.6(14)   |
| C8  | C9  | C10 | C11 | 1.5(14)  | C59 | C66 | C67 | C68 | 177.7(8)  |
| C9  | C10 | C11 | C12 | 0.4(15)  | C66 | C67 | C68 | C69 | 1.9(15)   |
| C10 | C11 | C12 | C13 | 2.5(15)  | C67 | C68 | C69 | C70 | 0.3(15)   |
| C11 | C12 | C13 | C8  | 2.7(14)  | C68 | C69 | C70 | C71 | 1.6(15)   |
| C9  | C8  | C13 | C12 | 0.8(13)  | C67 | C66 | C71 | C70 | 0.3(13)   |
| C28 | C8  | C13 | C12 | 178.1(8) | C59 | C66 | C71 | C70 | 179.6(8)  |
| C2  | C28 | C14 | C19 | 50.5(9)  | C69 | C70 | C71 | C66 | 1.9(14)   |
| C20 | C28 | C14 | C19 | 70.4(9)  | C78 | C59 | C72 | C77 | 114.7(10) |
| C8  | C28 | C14 | C19 | 173.9(7) | C60 | C59 | C72 | C77 | 122.9(9)  |
| C2  | C28 | C14 | C15 | 127.1(8) | C66 | C59 | C72 | C77 | 2.7(11)   |
| C20 | C28 | C14 | C15 | 112.0(9) | C78 | C59 | C72 | C73 | 67.2(10)  |
| C8  | C28 | C14 | C15 | 3.7(11)  | C60 | C59 | C72 | C73 | 55.2(10)  |
| C19 | C14 | C15 | C16 | 2.7(12)  | C66 | C59 | C72 | C73 | 175.5(7)  |
| C28 | C14 | C15 | C16 | 179.6(8) | C77 | C72 | C73 | C74 | 2.4(13)   |

|     |     |     |     |           |     |     |     |     |           |
|-----|-----|-----|-----|-----------|-----|-----|-----|-----|-----------|
| C14 | C15 | C16 | C17 | 1.9(14)   | C59 | C72 | C73 | C74 | 179.4(7)  |
| C15 | C16 | C17 | C18 | 0.0(14)   | C72 | C73 | C74 | C75 | 3.1(14)   |
| C16 | C17 | C18 | C19 | 1.0(14)   | C73 | C74 | C75 | C76 | 0.6(15)   |
| C17 | C18 | C19 | C14 | 0.0(14)   | C74 | C75 | C76 | C77 | 2.7(15)   |
| C15 | C14 | C19 | C18 | 1.8(12)   | C73 | C72 | C77 | C76 | 0.8(13)   |
| C28 | C14 | C19 | C18 | 179.5(8)  | C59 | C72 | C77 | C76 | 177.3(8)  |
| C2  | C28 | C20 | C25 | 111.1(10) | C75 | C76 | C77 | C72 | 3.4(14)   |
| C14 | C28 | C20 | C25 | 7.1(12)   | C72 | C59 | C78 | C79 | 4.9(13)   |
| C8  | C28 | C20 | C25 | 127.2(9)  | C60 | C59 | C78 | C79 | 114.2(10) |
| C2  | C28 | C20 | C21 | 71.5(10)  | C66 | C59 | C78 | C79 | 124.8(10) |
| C14 | C28 | C20 | C21 | 170.2(8)  | C72 | C59 | C78 | C83 | 172.8(8)  |
| C8  | C28 | C20 | C21 | 50.2(10)  | C60 | C59 | C78 | C83 | 68.1(11)  |
| C25 | C20 | C21 | C22 | 1.7(14)   | C66 | C59 | C78 | C83 | 52.9(11)  |
| C28 | C20 | C21 | C22 | 175.9(8)  | C83 | C78 | C79 | C80 | 3.2(14)   |
| C20 | C21 | C22 | C23 | 1.3(14)   | C59 | C78 | C79 | C80 | 174.4(9)  |
| C21 | C22 | C23 | C24 | 0.2(14)   | C78 | C79 | C80 | C81 | 1.0(14)   |
| C21 | C22 | C23 | N1  | 178.8(8)  | C79 | C80 | C81 | C82 | 1.8(14)   |
| C1  | N1  | C23 | C24 | 134.9(10) | C79 | C80 | C81 | N4  | 177.0(8)  |
| C26 | N1  | C23 | C24 | 43.2(13)  | C86 | N4  | C81 | C82 | 44.9(13)  |
| C1  | N1  | C23 | C22 | 43.6(13)  | C84 | N4  | C81 | C82 | 137.1(10) |
| C26 | N1  | C23 | C22 | 138.2(9)  | C86 | N4  | C81 | C80 | 133.9(9)  |
| C22 | C23 | C24 | C25 | 0.4(15)   | C84 | N4  | C81 | C80 | 44.1(13)  |
| N1  | C23 | C24 | C25 | 178.1(8)  | C80 | C81 | C82 | C83 | 2.1(14)   |
| C21 | C20 | C25 | C24 | 1.0(14)   | N4  | C81 | C82 | C83 | 176.7(8)  |
| C28 | C20 | C25 | C24 | 176.4(8)  | C81 | C82 | C83 | C78 | 0.4(14)   |
| C23 | C24 | C25 | C20 | 0.0(15)   | C79 | C78 | C83 | C82 | 3.0(14)   |
| C1  | N1  | C26 | C27 | 0.6(11)   | C59 | C78 | C83 | C82 | 174.8(8)  |
| C23 | N1  | C26 | C27 | 179.0(8)  | C86 | N4  | C84 | C85 | 1.0(11)   |
| N1  | C26 | C27 | N2  | 0.3(10)   | C81 | N4  | C84 | C85 | 179.2(8)  |

|     |     |     |     |           |     |     |     |      |           |
|-----|-----|-----|-----|-----------|-----|-----|-----|------|-----------|
| C1  | N2  | C27 | C26 | 0.1(11)   | N4  | C84 | C85 | N5   | 0.5(11)   |
| C29 | N2  | C27 | C26 | 179.7(8)  | C86 | N5  | C85 | C84  | 0.2(11)   |
| C26 | N1  | C1  | N2  | 0.6(10)   | C87 | N5  | C85 | C84  | 177.7(9)  |
| C23 | N1  | C1  | N2  | 179.0(8)  | C84 | N4  | C86 | N5   | 1.1(10)   |
| C26 | N1  | C1  | Pd1 | 179.5(7)  | C81 | N4  | C86 | N5   | 179.3(8)  |
| C23 | N1  | C1  | Pd1 | 2.1(14)   | C84 | N4  | C86 | Pd2  | 180.0(7)  |
| C27 | N2  | C1  | N1  | 0.4(10)   | C81 | N4  | C86 | Pd2  | 1.8(13)   |
| C29 | N2  | C1  | N1  | 179.4(8)  | C85 | N5  | C86 | N4   | 0.8(10)   |
| C27 | N2  | C1  | Pd1 | 179.4(7)  | C87 | N5  | C86 | N4   | 178.4(8)  |
| C29 | N2  | C1  | Pd1 | 0.4(13)   | C85 | N5  | C86 | Pd2  | 179.7(6)  |
| C1  | N2  | C29 | C30 | 63.6(12)  | C87 | N5  | C86 | Pd2  | 2.7(13)   |
| C27 | N2  | C29 | C30 | 116.6(11) | C86 | N5  | C87 | C88  | 117.8(10) |
| C1  | N2  | C29 | C34 | 117.8(10) | C85 | N5  | C87 | C88  | 65.0(13)  |
| C27 | N2  | C29 | C34 | 62.0(12)  | C86 | N5  | C87 | C92  | 58.8(13)  |
| C34 | C29 | C30 | C31 | 2.8(15)   | C85 | N5  | C87 | C92  | 118.4(11) |
| N2  | C29 | C30 | C31 | 178.6(8)  | C92 | C87 | C88 | C89  | 2.8(14)   |
| C29 | C30 | C31 | C32 | 1.2(15)   | N5  | C87 | C88 | C89  | 179.4(8)  |
| C30 | C31 | C32 | C33 | 0.4(14)   | C87 | C88 | C89 | C90  | 1.4(14)   |
| C30 | C31 | C32 | C35 | 179.3(9)  | C88 | C89 | C90 | C91  | 0.3(14)   |
| C31 | C32 | C33 | C34 | 1.3(14)   | C88 | C89 | C90 | C93  | 178.0(9)  |
| C35 | C32 | C33 | C34 | 178.4(9)  | C89 | C90 | C91 | C92  | 0.7(14)   |
| C30 | C29 | C34 | C33 | 3.6(14)   | C93 | C90 | C91 | C92  | 177.7(8)  |
| N2  | C29 | C34 | C33 | 177.8(8)  | C88 | C87 | C92 | C91  | 2.4(14)   |
| C32 | C33 | C34 | C29 | 2.8(14)   | N5  | C87 | C92 | C91  | 179.0(8)  |
| C33 | C32 | C35 | C48 | 129.5(10) | C90 | C91 | C92 | C87  | 0.6(14)   |
| C31 | C32 | C35 | C48 | 50.7(11)  | C89 | C90 | C93 | C94  | 130.9(10) |
| C33 | C32 | C35 | C36 | 6.8(13)   | C91 | C90 | C93 | C94  | 50.8(11)  |
| C31 | C32 | C35 | C36 | 173.5(8)  | C89 | C90 | C93 | C106 | 9.3(13)   |
| C33 | C32 | C35 | C42 | 109.0(10) | C91 | C90 | C93 | C106 | 172.5(8)  |

|     |     |     |     |          |      |      |      |      |           |
|-----|-----|-----|-----|----------|------|------|------|------|-----------|
| C31 | C32 | C35 | C42 | 70.8(10) | C89  | C90  | C93  | C100 | 106.1(10) |
| C48 | C35 | C36 | C41 | 1.1(12)  | C91  | C90  | C93  | C100 | 72.1(11)  |
| C42 | C35 | C36 | C41 | 122.3(9) | C90  | C93  | C94  | C99  | 127.5(9)  |
| C32 | C35 | C36 | C41 | 119.2(9) | C106 | C93  | C94  | C99  | 109.6(10) |
| C48 | C35 | C36 | C37 | 176.3(8) | C100 | C93  | C94  | C99  | 5.9(12)   |
| C42 | C35 | C36 | C37 | 52.9(10) | C90  | C93  | C94  | C95  | 55.2(11)  |
| C32 | C35 | C36 | C37 | 65.6(11) | C106 | C93  | C94  | C95  | 67.8(10)  |
| C41 | C36 | C37 | C38 | 2.5(13)  | C100 | C93  | C94  | C95  | 176.8(8)  |
| C35 | C36 | C37 | C38 | 178.0(8) | C99  | C94  | C95  | C96  | 3.4(14)   |
| C36 | C37 | C38 | C39 | 1.3(14)  | C93  | C94  | C95  | C96  | 174.1(9)  |
| C37 | C38 | C39 | C40 | 0.2(14)  | C94  | C95  | C96  | C97  | 0.3(15)   |
| C38 | C39 | C40 | C41 | 0.4(15)  | C95  | C96  | C97  | C98  | 2.6(15)   |
| C39 | C40 | C41 | C36 | 1.0(15)  | C96  | C97  | C98  | C99  | 2.3(15)   |
| C37 | C36 | C41 | C40 | 2.3(13)  | C95  | C94  | C99  | C98  | 3.8(14)   |
| C35 | C36 | C41 | C40 | 177.6(8) | C93  | C94  | C99  | C98  | 173.6(8)  |
| C48 | C35 | C42 | C43 | 121.9(9) | C97  | C98  | C99  | C94  | 1.1(14)   |
| C36 | C35 | C42 | C43 | 114.8(9) | C90  | C93  | C100 | C105 | 1.8(13)   |
| C32 | C35 | C42 | C43 | 5.4(12)  | C94  | C93  | C100 | C105 | 118.0(10) |
| C48 | C35 | C42 | C47 | 68.0(10) | C106 | C93  | C100 | C105 | 122.6(10) |
| C36 | C35 | C42 | C47 | 55.3(11) | C90  | C93  | C100 | C101 | 176.7(9)  |
| C32 | C35 | C42 | C47 | 175.5(8) | C94  | C93  | C100 | C101 | 63.5(11)  |
| C47 | C42 | C43 | C44 | 0.3(14)  | C106 | C93  | C100 | C101 | 55.9(11)  |
| C35 | C42 | C43 | C44 | 170.8(9) | C105 | C100 | C101 | C102 | 2.3(15)   |
| C42 | C43 | C44 | C45 | 0.8(16)  | C93  | C100 | C101 | C102 | 176.2(10) |
| C43 | C44 | C45 | C46 | 2.4(16)  | C100 | C101 | C102 | C103 | 0.6(17)   |
| C44 | C45 | C46 | C47 | 3.7(16)  | C101 | C102 | C103 | C104 | 2.3(17)   |
| C45 | C46 | C47 | C42 | 3.3(16)  | C102 | C103 | C104 | C105 | 1.1(16)   |
| C43 | C42 | C47 | C46 | 1.6(15)  | C103 | C104 | C105 | C100 | 1.9(16)   |
| C35 | C42 | C47 | C46 | 172.4(9) | C101 | C100 | C105 | C104 | 3.6(15)   |

|     |     |     |     |          |      |      |      |      |          |
|-----|-----|-----|-----|----------|------|------|------|------|----------|
| C36 | C35 | C48 | C49 | 63.2(11) | C93  | C100 | C105 | C104 | 174.9(9) |
| C42 | C35 | C48 | C49 | 178.1(8) | C90  | C93  | C106 | C111 | 115.4(9) |
| C32 | C35 | C48 | C49 | 58.9(10) | C94  | C93  | C106 | C111 | 4.4(11)  |
| C36 | C35 | C48 | C53 | 122.9(9) | C100 | C93  | C106 | C111 | 125.3(9) |
| C42 | C35 | C48 | C53 | 4.2(11)  | C90  | C93  | C106 | C107 | 68.3(10) |
| C32 | C35 | C48 | C53 | 115.0(9) | C94  | C93  | C106 | C107 | 171.8(8) |
| C53 | C48 | C49 | C50 | 1.7(14)  | C100 | C93  | C106 | C107 | 51.0(10) |
| C35 | C48 | C49 | C50 | 176.1(9) | C111 | C106 | C107 | C108 | 3.3(13)  |
| C48 | C49 | C50 | C51 | 2.0(16)  | C93  | C106 | C107 | C108 | 179.8(8) |
| C49 | C50 | C51 | C52 | 0.6(16)  | C106 | C107 | C108 | C109 | 1.7(14)  |
| C50 | C51 | C52 | C53 | 0.9(15)  | C107 | C108 | C109 | C110 | 1.2(14)  |
| C51 | C52 | C53 | C48 | 1.2(15)  | C108 | C109 | C110 | C111 | 2.5(14)  |
| C49 | C48 | C53 | C52 | 0.1(13)  | C109 | C110 | C111 | C106 | 0.9(14)  |
| C35 | C48 | C53 | C52 | 174.3(8) | C107 | C106 | C111 | C110 | 2.1(13)  |
| C58 | N3  | C54 | C55 | 0.8(15)  | C93  | C106 | C111 | C110 | 178.3(8) |
| Pd1 | N3  | C54 | C55 | 179.5(8) | C114 | N6   | C113 | C112 | 0.1(14)  |
| N3  | C54 | C55 | C56 | 0.1(16)  | Pd2  | N6   | C113 | C112 | 177.9(8) |
| N3  | C54 | C55 | Cl3 | 178.2(8) | C116 | C112 | C113 | N6   | 0.2(16)  |
| C54 | C55 | C56 | C57 | 1.1(16)  | Cl6  | C112 | C113 | N6   | 179.0(7) |
| Cl3 | C55 | C56 | C57 | 179.0(9) | C113 | N6   | C114 | C115 | 0.2(15)  |
| C55 | C56 | C57 | C58 | 1.2(16)  | Pd2  | N6   | C114 | C115 | 178.0(8) |
| C54 | N3  | C58 | C57 | 0.7(15)  | N6   | C114 | C115 | C116 | 0.4(16)  |
| Pd1 | N3  | C58 | C57 | 179.5(8) | C114 | C115 | C116 | C112 | 0.5(16)  |

**Table S14.** Hydrogen Atom Coordinates ( $\text{\AA}\times 10^4$ ) and Isotropic Displacement Parameters ( $\text{\AA}^2\times 10^3$ ) for Complex **5**.

| Atom | x     | Y    | z    | U(eq) |
|------|-------|------|------|-------|
| H23  | 1868  | 2116 | 3047 | 18    |
| H2   | -1078 | 888  | 3028 | 20    |



|     |       |       |       |    |
|-----|-------|-------|-------|----|
| H3  | 306   | -126  | 3980  | 17 |
| H6  | 864   | 1643  | 4497  | 20 |
| H7  | 505   | 1944  | 5604  | 25 |
| H8  | 1730  | 1305  | 6670  | 30 |
| H9  | 3324  | 359   | 6624  | 30 |
| H10 | 3679  | 49    | 5530  | 26 |
| H12 | 4393  | 1431  | 4471  | 25 |
| H13 | 6131  | 1993  | 3734  | 33 |
| H14 | 6467  | 1916  | 2538  | 36 |
| H15 | 5019  | 1305  | 2047  | 33 |
| H16 | 3287  | 750   | 2764  | 25 |
| H18 | 1268  | -625  | 5258  | 20 |
| H19 | 1317  | -2095 | 5655  | 24 |
| H20 | 2709  | -2775 | 5092  | 28 |
| H21 | 4142  | -1982 | 4187  | 30 |
| H22 | 4100  | -505  | 3786  | 23 |
| H24 | -2532 | 5306  | -112  | 19 |
| H25 | -1156 | 4693  | -854  | 20 |
| H27 | 1564  | 3340  | 818   | 15 |
| H28 | 2920  | 2313  | 686   | 16 |
| H30 | 748   | 2025  | -875  | 20 |
| H31 | -620  | 3067  | -748  | 20 |
| H34 | 869   | 486   | -201  | 27 |
| H35 | 422   | -140  | -1054 | 34 |
| H36 | 1849  | -144  | -2016 | 31 |
| H37 | 3694  | 480   | -2102 | 28 |
| H38 | 4132  | 1146  | -1264 | 20 |
| H40 | 1483  | 1073  | 1299  | 21 |
| H41 | 1331  | -93   | 2453  | 29 |

|      |       |       |       |    |
|------|-------|-------|-------|----|
| H42  | 2366  | -1375 | 2609  | 31 |
| H43  | 3589  | -1476 | 1596  | 32 |
| H44  | 3790  | -305  | 458   | 25 |
| H46  | 4895  | 826   | 822   | 22 |
| H47  | 6740  | 1506  | 627   | 31 |
| H48  | 7064  | 2728  | -462  | 36 |
| H49  | 5542  | 3251  | -1377 | 30 |
| H50  | 3704  | 2577  | -1184 | 23 |
| H52  | -2737 | 3299  | 2114  | 19 |
| H53  | -3530 | 3527  | 3187  | 19 |
| H55  | -3044 | 6038  | 2113  | 16 |
| H56  | -2190 | 5812  | 1042  | 17 |
| H59  | -5951 | 5767  | 3452  | 23 |
| H60  | -6407 | 7212  | 3123  | 32 |
| H61  | -4848 | 8169  | 2845  | 31 |
| H62  | -2818 | 7671  | 2932  | 29 |
| H63  | -2360 | 6223  | 3300  | 24 |
| H65  | -3508 | 5014  | 4905  | 24 |
| H66  | -1964 | 4572  | 5789  | 33 |
| H67  | -170  | 3933  | 5534  | 37 |
| H68  | 83    | 3761  | 4360  | 32 |
| H69  | -1481 | 4178  | 3474  | 23 |
| H71  | -5693 | 4745  | 2811  | 21 |
| H72  | -7415 | 3936  | 3213  | 27 |
| H73  | -7646 | 3022  | 4498  | 29 |
| H74  | -6157 | 2943  | 5370  | 29 |
| H75  | -4440 | 3754  | 4972  | 22 |
| H76A | 421   | 5439  | 3064  | 87 |
| H76B | -116  | 5786  | 2217  | 87 |

|      |      |      |      |    |
|------|------|------|------|----|
| H77A | 4564 | 3618 | 2065 | 43 |
| H77B | 3267 | 3776 | 1667 | 43 |

**Table S15.** Crystal data and structure refinement for complex **6**.

|                                             |                                                                                  |
|---------------------------------------------|----------------------------------------------------------------------------------|
| Identification code                         | <b>6</b>                                                                         |
| Empirical formula                           | C <sub>62</sub> H <sub>53</sub> Cl <sub>2</sub> N <sub>3</sub> O <sub>2</sub> Pd |
| Formula weight                              | 1049.37                                                                          |
| Temperature/K                               | 173(2)                                                                           |
| Crystal system                              | Triclinic                                                                        |
| Space group                                 | P-1                                                                              |
| a/Å                                         | 12.6752(9)                                                                       |
| b/Å                                         | 13.2902(9)                                                                       |
| c/Å                                         | 16.9619(13)                                                                      |
| α/°                                         | 92.605(2)                                                                        |
| β/°                                         | 108.9860(10)                                                                     |
| γ/°                                         | 107.7310(10)                                                                     |
| Volume/Å <sup>3</sup>                       | 2540.2(3)                                                                        |
| Z                                           | 2                                                                                |
| ρ <sub>calc</sub> /cm <sup>3</sup>          | 1.372                                                                            |
| μ/mm <sup>-1</sup>                          | 0.519                                                                            |
| F(000)                                      | 1084                                                                             |
| Crystal size/mm <sup>3</sup>                | 0.15 × 0.14 × 0.13                                                               |
| Radiation                                   | MoKα (λ = 0.71073)                                                               |
| 2θ range for data collection/°              | 1.63 to 25.01                                                                    |
| Index ranges                                | -14 ≤ h ≤ 15, -13 ≤ k ≤ 15, -20 ≤ l ≤ 18                                         |
| Reflections collected                       | 14815                                                                            |
| Independent reflections                     | 8930 [R(int) = 0.0380]                                                           |
| Data/restraints/parameters                  | 8930 / 0 / 633                                                                   |
| Goodness-of-fit on F <sup>2</sup>           | 1.021                                                                            |
| Final R indexes [I ≥ 2σ (I)]                | R1 = 0.0445, wR2 = 0.0890                                                        |
| Final R indexes [all data]                  | R1 = 0.0618, wR2 = 0.0976                                                        |
| Largest diff. peak/hole / e Å <sup>-3</sup> | 0.453-0.666                                                                      |

**Table S16.** Fractional Atomic Coordinates ( $\times 10^4$ ) and Equivalent Isotropic Displacement Parameters ( $\text{\AA}^2 \times 10^3$ ) for Complex **6**.  $U_{\text{eq}}$  is defined as 1/3 of the trace of the orthogonalised  $U_{\text{ij}}$  tensor.

| Atom | x       | Y        | z       | U(eq) |
|------|---------|----------|---------|-------|
| Pd1  | 1835(1) | 3185(1)  | 5243(1) | 14(1) |
| Cl1  | 2135(1) | 1796(1)  | 5950(1) | 21(1) |
| Cl2  | 1661(1) | 4615(1)  | 4547(1) | 26(1) |
| O1   | 1299(2) | 3358(2)  | 666(2)  | 36(1) |
| O2   | 2119(3) | 3562(2)  | 2071(2) | 41(1) |
| N1   | 4284(2) | 3552(2)  | 5231(2) | 12(1) |
| N2   | 4288(2) | 4632(2)  | 6208(2) | 13(1) |
| N3   | -6(2)   | 2519(2)  | 4913(2) | 20(1) |
| C1   | 2745(3) | 12(3)    | 2532(2) | 13(1) |
| C2   | 1413(3) | -583(3)  | 2373(2) | 16(1) |
| C3   | 1067(3) | -801(3)  | 3060(2) | 24(1) |
| C4   | -99(3)  | -1394(3) | 2956(3) | 31(1) |
| C5   | -938(3) | -1768(3) | 2154(3) | 30(1) |
| C6   | -611(3) | -1539(3) | 1467(3) | 30(1) |
| C7   | 557(3)  | -944(3)  | 1576(2) | 23(1) |
| C8   | 3451(3) | -765(3)  | 2774(2) | 13(1) |
| C9   | 4637(3) | -427(3)  | 2821(2) | 14(1) |
| C10  | 5307(3) | -1089(3) | 3020(2) | 15(1) |
| C11  | 4804(3) | -2118(3) | 3155(2) | 17(1) |
| C12  | 3633(3) | -2466(3) | 3095(2) | 21(1) |
| C13  | 2966(3) | -1790(3) | 2915(2) | 17(1) |
| C14  | 2932(3) | 421(3)   | 1734(2) | 13(1) |
| C15  | 2805(3) | -323(3)  | 1062(2) | 17(1) |

|     |         |         |          |       |
|-----|---------|---------|----------|-------|
| C16 | 2948(3) | -7(3)   | 331(2)   | 20(1) |
| C17 | 3235(3) | 1060(3) | 236(2)   | 20(1) |
| C18 | 3369(3) | 1803(3) | 893(2)   | 19(1) |
| C19 | 3229(3) | 1487(3) | 1628(2)  | 17(1) |
| C20 | 3191(3) | 954(3)  | 3268(2)  | 13(1) |
| C21 | 4180(3) | 1132(3) | 3988(2)  | 15(1) |
| C22 | 4543(3) | 1982(3) | 4631(2)  | 15(1) |
| C23 | 3906(3) | 2677(3) | 4556(2)  | 13(1) |
| C24 | 2902(3) | 2520(3) | 3849(2)  | 14(1) |
| C25 | 2544(3) | 1654(3) | 3217(2)  | 16(1) |
| C26 | 5455(3) | 4211(3) | 5643(2)  | 13(1) |
| C27 | 5460(3) | 4881(3) | 6260(2)  | 15(1) |
| C28 | 3553(3) | 3817(3) | 5567(2)  | 13(1) |
| C29 | 3894(3) | 5129(3) | 6779(2)  | 13(1) |
| C30 | 4129(3) | 6222(3) | 6878(2)  | 18(1) |
| C31 | 3720(3) | 6685(3) | 7424(2)  | 17(1) |
| C32 | 3090(3) | 6072(3) | 7869(2)  | 14(1) |
| C33 | 2875(3) | 4965(3) | 7757(2)  | 18(1) |
| C34 | 3272(3) | 4498(3) | 7220(2)  | 17(1) |
| C35 | 2649(3) | 6551(3) | 8502(2)  | 15(1) |
| C36 | 3546(3) | 6725(3) | 9412(2)  | 15(1) |
| C37 | 4459(3) | 6301(3) | 9635(2)  | 16(1) |
| C38 | 5242(3) | 6491(3) | 10459(2) | 21(1) |
| C39 | 5121(3) | 7090(3) | 11095(2) | 22(1) |
| C40 | 4197(3) | 7501(3) | 10882(2) | 21(1) |
| C41 | 3427(3) | 7324(3) | 10057(2) | 18(1) |
| C42 | 2550(3) | 7661(3) | 8305(2)  | 17(1) |
| C43 | 3584(3) | 8558(3) | 8569(2)  | 18(1) |
| C44 | 3565(4) | 9562(3) | 8414(2)  | 26(1) |

|     |          |         |         |       |
|-----|----------|---------|---------|-------|
| C45 | 2506(4)  | 9704(3) | 7985(3) | 30(1) |
| C46 | 1469(4)  | 8838(3) | 7715(3) | 35(1) |
| C47 | 1497(3)  | 7823(3) | 7877(2) | 25(1) |
| C48 | 1433(3)  | 5737(3) | 8425(2) | 15(1) |
| C49 | 1202(3)  | 5321(3) | 9111(2) | 18(1) |
| C50 | 107(3)   | 4572(3) | 9015(3) | 25(1) |
| C51 | -780(3)  | 4238(3) | 8236(3) | 30(1) |
| C52 | -556(3)  | 4632(3) | 7542(3) | 33(1) |
| C53 | 533(3)   | 5358(3) | 7631(2) | 25(1) |
| C54 | -649(3)  | 3136(3) | 4962(3) | 31(1) |
| C55 | -1860(3) | 2719(3) | 4781(3) | 47(1) |
| C56 | -2423(3) | 1631(3) | 4540(3) | 51(2) |
| C57 | -1768(3) | 991(3)  | 4489(3) | 40(1) |
| C58 | -570(3)  | 1461(3) | 4673(3) | 26(1) |
| C59 | 3193(4)  | 4608(3) | 1294(3) | 42(1) |
| C60 | 2177(3)  | 3808(3) | 1403(3) | 29(1) |
| C61 | 203(3)   | 2582(3) | 686(3)  | 38(1) |
| C62 | 279(3)   | 1511(3) | 798(3)  | 34(1) |

**Table S17.** Anisotropic Displacement Parameters ( $\text{\AA}^2 \times 10^3$ ) for Complex **6**. The Anisotropic displacement factor exponent takes the form:  $-2\pi^2[h^2a^{*2}U_{11}+2hka^*b^*U_{12}+\dots]$ .

| Atom | U11   | U22   | U33   | U23   | U13   | U12   |
|------|-------|-------|-------|-------|-------|-------|
| Pd1  | 13(1) | 13(1) | 16(1) | 0(1)  | 6(1)  | 5(1)  |
| Cl1  | 16(1) | 19(1) | 30(1) | 8(1)  | 9(1)  | 7(1)  |
| Cl2  | 23(1) | 23(1) | 35(1) | 13(1) | 11(1) | 12(1) |
| O1   | 32(2) | 42(2) | 32(2) | 11(1) | 7(1)  | 13(1) |
| O2   | 57(2) | 34(2) | 29(2) | 5(1)  | 12(2) | 16(2) |
| N1   | 14(1) | 11(2) | 11(2) | 0(1)  | 6(1)  | 6(1)  |
| N2   | 18(1) | 11(2) | 9(2)  | -1(1) | 7(1)  | 4(1)  |

|     |       |       |       |       |       |       |
|-----|-------|-------|-------|-------|-------|-------|
| N3  | 18(2) | 20(2) | 19(2) | -1(1) | 4(1)  | 8(1)  |
| C1  | 12(2) | 12(2) | 15(2) | -1(1) | 5(1)  | 3(1)  |
| C2  | 14(2) | 15(2) | 20(2) | 1(2)  | 7(2)  | 7(2)  |
| C3  | 17(2) | 32(2) | 23(2) | 0(2)  | 8(2)  | 6(2)  |
| C4  | 30(2) | 33(3) | 34(3) | 7(2)  | 21(2) | 8(2)  |
| C5  | 14(2) | 28(2) | 49(3) | 8(2)  | 16(2) | 3(2)  |
| C6  | 16(2) | 31(2) | 32(3) | 1(2)  | -1(2) | 4(2)  |
| C7  | 18(2) | 23(2) | 24(2) | 5(2)  | 8(2)  | 4(2)  |
| C8  | 16(2) | 14(2) | 9(2)  | -2(1) | 4(1)  | 4(1)  |
| C9  | 18(2) | 12(2) | 12(2) | -2(1) | 8(2)  | 2(1)  |
| C10 | 13(2) | 23(2) | 9(2)  | -1(2) | 3(1)  | 7(2)  |
| C11 | 19(2) | 18(2) | 12(2) | -1(2) | 1(2)  | 10(2) |
| C12 | 20(2) | 17(2) | 20(2) | 3(2)  | 3(2)  | 4(2)  |
| C13 | 14(2) | 15(2) | 21(2) | 1(2)  | 7(2)  | 2(1)  |
| C14 | 7(2)  | 14(2) | 16(2) | 1(1)  | 2(1)  | 3(1)  |
| C15 | 17(2) | 15(2) | 18(2) | -1(2) | 5(2)  | 5(2)  |
| C16 | 26(2) | 21(2) | 17(2) | -1(2) | 10(2) | 10(2) |
| C17 | 20(2) | 27(2) | 19(2) | 7(2)  | 11(2) | 9(2)  |
| C18 | 22(2) | 16(2) | 23(2) | 4(2)  | 10(2) | 8(2)  |
| C19 | 15(2) | 19(2) | 19(2) | 0(2)  | 9(2)  | 5(2)  |
| C20 | 14(2) | 11(2) | 13(2) | 2(1)  | 7(1)  | 2(1)  |
| C21 | 18(2) | 16(2) | 14(2) | 0(1)  | 7(2)  | 10(2) |
| C22 | 12(2) | 19(2) | 11(2) | -2(1) | 3(1)  | 4(1)  |
| C23 | 17(2) | 11(2) | 13(2) | 1(1)  | 10(2) | 3(1)  |
| C24 | 15(2) | 14(2) | 18(2) | 3(1)  | 9(2)  | 7(1)  |
| C25 | 14(2) | 22(2) | 13(2) | 1(2)  | 4(1)  | 7(2)  |
| C26 | 12(2) | 16(2) | 13(2) | 3(1)  | 6(1)  | 5(1)  |
| C27 | 14(2) | 14(2) | 15(2) | 0(1)  | 5(1)  | 3(1)  |
| C28 | 17(2) | 12(2) | 9(2)  | 1(1)  | 6(1)  | 6(1)  |

|     |       |       |       |       |       |       |
|-----|-------|-------|-------|-------|-------|-------|
| C29 | 14(2) | 14(2) | 9(2)  | -3(1) | 2(1)  | 5(1)  |
| C30 | 18(2) | 13(2) | 19(2) | -3(2) | 9(2)  | 2(2)  |
| C31 | 18(2) | 10(2) | 19(2) | -4(1) | 5(2)  | 2(1)  |
| C32 | 14(2) | 10(2) | 13(2) | -2(1) | 2(1)  | 3(1)  |
| C33 | 22(2) | 15(2) | 17(2) | 0(2)  | 10(2) | 2(2)  |
| C34 | 24(2) | 9(2)  | 18(2) | 0(1)  | 9(2)  | 6(2)  |
| C35 | 17(2) | 15(2) | 14(2) | 0(1)  | 8(2)  | 6(2)  |
| C36 | 18(2) | 11(2) | 15(2) | 2(1)  | 7(2)  | 2(1)  |
| C37 | 21(2) | 11(2) | 18(2) | 1(1)  | 10(2) | 4(2)  |
| C38 | 16(2) | 22(2) | 26(2) | 6(2)  | 7(2)  | 7(2)  |
| C39 | 25(2) | 19(2) | 13(2) | 1(2)  | -2(2) | 4(2)  |
| C40 | 27(2) | 18(2) | 14(2) | -4(2) | 8(2)  | 4(2)  |
| C41 | 20(2) | 14(2) | 16(2) | -3(2) | 6(2)  | 4(2)  |
| C42 | 25(2) | 19(2) | 15(2) | 3(2)  | 13(2) | 13(2) |
| C43 | 26(2) | 17(2) | 16(2) | -1(2) | 11(2) | 10(2) |
| C44 | 43(2) | 16(2) | 29(2) | 2(2)  | 25(2) | 11(2) |
| C45 | 53(3) | 25(2) | 36(3) | 19(2) | 34(2) | 26(2) |
| C46 | 38(2) | 48(3) | 41(3) | 28(2) | 25(2) | 33(2) |
| C47 | 24(2) | 31(2) | 23(2) | 9(2)  | 11(2) | 11(2) |
| C48 | 20(2) | 16(2) | 11(2) | 0(1)  | 7(2)  | 7(2)  |
| C49 | 18(2) | 17(2) | 16(2) | -1(2) | 4(2)  | 4(2)  |
| C50 | 28(2) | 23(2) | 24(2) | 5(2)  | 14(2) | 3(2)  |
| C51 | 24(2) | 32(3) | 30(3) | 0(2)  | 11(2) | 1(2)  |
| C52 | 21(2) | 37(3) | 26(3) | -1(2) | 2(2)  | -3(2) |
| C53 | 25(2) | 27(2) | 18(2) | 1(2)  | 9(2)  | 2(2)  |
| C54 | 18(2) | 14(2) | 57(3) | -2(2) | 11(2) | 5(2)  |
| C55 | 18(2) | 34(3) | 88(4) | -5(2) | 15(2) | 12(2) |
| C56 | 15(2) | 31(3) | 91(4) | -8(3) | 9(2)  | 0(2)  |
| C57 | 19(2) | 27(3) | 55(3) | -9(2) | -3(2) | 4(2)  |



|     |       |       |       |       |       |       |
|-----|-------|-------|-------|-------|-------|-------|
| C58 | 22(2) | 17(2) | 33(3) | -5(2) | 2(2)  | 7(2)  |
| C59 | 46(3) | 36(3) | 39(3) | 8(2)  | 14(2) | 9(2)  |
| C60 | 31(2) | 31(3) | 25(3) | 2(2)  | 5(2)  | 16(2) |
| C61 | 18(2) | 45(3) | 48(3) | 10(2) | 13(2) | 8(2)  |
| C62 | 22(2) | 44(3) | 29(3) | 6(2)  | 6(2)  | 7(2)  |

**Table S18.** Bond Lengths for Complex 6

| Atom | Atom | Length/Å       | Atom | Atom | Length/Å |
|------|------|----------------|------|------|----------|
| Pd1  | C28  | 1.954(3)       | C29  | C34  | 1.387(5) |
| Pd1  | N3   | 2.095(3)       | C30  | C31  | 1.400(4) |
| Pd1  | Cl1  | 2.3076(9)      | C30  | H30  | 0.9500   |
| Pd1  | Cl2  | 2.3115(10<br>) | C31  | C32  | 1.386(5) |
| O1   | C60  | 1.334(5)       | C31  | H31  | 0.9500   |
| O1   | C61  | 1.468(5)       | C32  | C33  | 1.405(4) |
| O2   | C60  | 1.212(5)       | C32  | C35  | 1.553(4) |
| N1   | C28  | 1.354(4)       | C33  | C34  | 1.380(4) |
| N1   | C26  | 1.392(4)       | C33  | H33  | 0.9500   |
| N1   | C23  | 1.441(4)       | C34  | H34  | 0.9500   |
| N2   | C28  | 1.357(4)       | C35  | C36  | 1.548(5) |
| N2   | C27  | 1.392(4)       | C35  | C48  | 1.551(5) |
| N2   | C29  | 1.443(4)       | C35  | C42  | 1.560(5) |
| N3   | C54  | 1.337(4)       | C36  | C37  | 1.390(4) |
| N3   | C58  | 1.341(4)       | C36  | C41  | 1.398(5) |
| C1   | C14  | 1.542(5)       | C37  | C38  | 1.383(5) |
| C1   | C8   | 1.548(4)       | C37  | H37  | 0.9500   |
| C1   | C20  | 1.554(4)       | C38  | C39  | 1.388(5) |
| C1   | C2   | 1.556(4)       | C38  | H38  | 0.9500   |
| C2   | C7   | 1.381(5)       | C39  | C40  | 1.390(5) |

|     |     |          |     |     |          |
|-----|-----|----------|-----|-----|----------|
| C2  | C3  | 1.385(5) | C39 | H39 | 0.9500   |
| C3  | C4  | 1.395(5) | C40 | C41 | 1.381(5) |
| C3  | H3  | 0.9500   | C40 | H40 | 0.9500   |
| C4  | C5  | 1.380(6) | C41 | H41 | 0.9500   |
| C4  | H4  | 0.9500   | C42 | C47 | 1.384(5) |
| C5  | C6  | 1.376(6) | C42 | C43 | 1.399(5) |
| C5  | H5  | 0.9500   | C43 | C44 | 1.378(5) |
| C6  | C7  | 1.395(5) | C43 | H43 | 0.9500   |
| C6  | H6  | 0.9500   | C44 | C45 | 1.378(5) |
| C7  | H7  | 0.9500   | C44 | H44 | 0.9500   |
| C8  | C13 | 1.381(5) | C45 | C46 | 1.378(6) |
| C8  | C9  | 1.405(4) | C45 | H45 | 0.9500   |
| C9  | C10 | 1.381(4) | C46 | C47 | 1.397(5) |
| C9  | H9  | 0.9500   | C46 | H46 | 0.9500   |
| C10 | C11 | 1.386(5) | C47 | H47 | 0.9500   |
| C10 | H10 | 0.9500   | C48 | C49 | 1.388(5) |
| C11 | C12 | 1.380(5) | C48 | C53 | 1.400(5) |
| C11 | H11 | 0.9500   | C49 | C50 | 1.393(5) |
| C12 | C13 | 1.392(5) | C49 | H49 | 0.9500   |
| C12 | H12 | 0.9500   | C50 | C51 | 1.372(5) |
| C13 | H13 | 0.9500   | C50 | H50 | 0.9500   |
| C14 | C19 | 1.387(5) | C51 | C52 | 1.386(6) |
| C14 | C15 | 1.409(4) | C51 | H51 | 0.9500   |
| C15 | C16 | 1.377(5) | C52 | C53 | 1.378(5) |
| C15 | H15 | 0.9500   | C52 | H52 | 0.9500   |
| C16 | C17 | 1.383(5) | C53 | H53 | 0.9500   |
| C16 | H16 | 0.9500   | C54 | C55 | 1.385(5) |
| C17 | C18 | 1.384(5) | C54 | H54 | 0.9500   |
| C17 | H17 | 0.9500   | C55 | C56 | 1.377(6) |

|     |     |          |     |      |          |
|-----|-----|----------|-----|------|----------|
| C18 | C19 | 1.382(5) | C55 | H55  | 0.9500   |
| C18 | H18 | 0.9500   | C56 | C57  | 1.375(5) |
| C19 | H19 | 0.9500   | C56 | H56  | 0.9500   |
| C20 | C21 | 1.384(4) | C57 | C58  | 1.375(5) |
| C20 | C25 | 1.404(4) | C57 | H57  | 0.9500   |
| C21 | C22 | 1.387(4) | C58 | H58  | 0.9500   |
| C21 | H21 | 0.9500   | C59 | C60  | 1.470(6) |
| C22 | C23 | 1.384(4) | C59 | H59A | 0.9800   |
| C22 | H22 | 0.9500   | C59 | H59B | 0.9800   |
| C23 | C24 | 1.387(4) | C59 | H59C | 0.9800   |
| C24 | C25 | 1.391(4) | C61 | C62  | 1.472(6) |
| C24 | H24 | 0.9500   | C61 | H61A | 0.9900   |
| C25 | H25 | 0.9500   | C61 | H61B | 0.9900   |
| C26 | C27 | 1.340(4) | C62 | H62A | 0.9800   |
| C26 | H26 | 0.9500   | C62 | H62B | 0.9800   |
| C27 | H27 | 0.9500   | C62 | H62C | 0.9800   |

**Table S19.** Bond Angles for Complex **6**

| Atom | Atom | Atom | Angle/°    | Atom | Atom | Atom | Angle/°  |
|------|------|------|------------|------|------|------|----------|
| C 28 | Pd 1 | N 3  | 179.11(13) | C 32 | C 31 | C 30 | 121.5(3) |
| C 28 | Pd 1 | Cl 1 | 88.12(10)  | C 32 | C 31 | H 31 | 119.3    |
| N 3  | Pd 1 | Cl 1 | 91.79(9)   | C 30 | C 31 | H 31 | 119.3    |
| C 28 | Pd 1 | Cl 2 | 88.29(10)  | C 31 | C 32 | C 33 | 117.8(3) |
| N 3  | Pd 1 | Cl 2 | 91.81(9)   | C 31 | C 32 | C 35 | 123.4(3) |
| Cl 1 | Pd 1 | Cl 2 | 176.37(3)  | C 33 | C 32 | C 35 | 118.7(3) |
| C 60 | O 1  | C 61 | 117.6(3)   | C 34 | C 33 | C 32 | 121.3(3) |
| C 28 | N 1  | C 26 | 111.1(3)   | C 34 | C 33 | H 33 | 119.3    |
| C 28 | N 1  | C 23 | 124.5(3)   | C 32 | C 33 | H 33 | 119.3    |

|      |     |      |          |      |      |      |          |
|------|-----|------|----------|------|------|------|----------|
| C 26 | N 1 | C 23 | 124.4(3) | C 33 | C 34 | C 29 | 119.6(3) |
| C 28 | N 2 | C 27 | 111.2(3) | C 33 | C 34 | H 34 | 120.2    |
| C 28 | N 2 | C 29 | 123.6(3) | C 29 | C 34 | H 34 | 120.2    |
| C 27 | N 2 | C 29 | 125.2(3) | C 36 | C 35 | C 48 | 109.9(3) |
| C 54 | N 3 | C 58 | 118.1(3) | C 36 | C 35 | C 32 | 109.9(3) |
| C 54 | N 3 | Pd 1 | 120.7(2) | C 48 | C 35 | C 32 | 107.4(3) |
| C 58 | N 3 | Pd 1 | 121.2(2) | C 36 | C 35 | C 42 | 107.6(3) |
| C 14 | C 1 | C 8  | 106.8(3) | C 48 | C 35 | C 42 | 111.5(3) |
| C 14 | C 1 | C 20 | 111.1(3) | C 32 | C 35 | C 42 | 110.5(3) |
| C 8  | C 1 | C 20 | 110.5(3) | C 37 | C 36 | C 41 | 117.4(3) |
| C 14 | C 1 | C 2  | 111.9(3) | C 37 | C 36 | C 35 | 123.8(3) |
| C 8  | C 1 | C 2  | 109.7(3) | C 41 | C 36 | C 35 | 118.8(3) |
| C 20 | C 1 | C 2  | 106.9(2) | C 38 | C 37 | C 36 | 121.3(3) |
| C 7  | C 2 | C 3  | 117.9(3) | C 38 | C 37 | H 37 | 119.3    |
| C 7  | C 2 | C 1  | 123.2(3) | C 36 | C 37 | H 37 | 119.3    |
| C 3  | C 2 | C 1  | 118.9(3) | C 37 | C 38 | C 39 | 120.9(3) |
| C 2  | C 3 | C 4  | 121.5(4) | C 37 | C 38 | H 38 | 119.5    |
| C 2  | C 3 | H 3  | 119.2    | C 39 | C 38 | H 38 | 119.5    |
| C 4  | C 3 | H 3  | 119.2    | C 38 | C 39 | C 40 | 118.2(3) |
| C 5  | C 4 | C 3  | 119.8(4) | C 38 | C 39 | H 39 | 120.9    |
| C 5  | C 4 | H 4  | 120.1    | C 40 | C 39 | H 39 | 120.9    |
| C 3  | C 4 | H 4  | 120.1    | C 41 | C 40 | C 39 | 120.7(3) |
| C 6  | C 5 | C 4  | 119.3(4) | C 41 | C 40 | H 40 | 119.6    |
| C 6  | C 5 | H 5  | 120.4    | C 39 | C 40 | H 40 | 119.6    |
| C 4  | C 5 | H 5  | 120.4    | C 40 | C 41 | C 36 | 121.3(3) |
| C 5  | C 6 | C 7  | 120.6(4) | C 40 | C 41 | H 41 | 119.3    |
| C 5  | C 6 | H 6  | 119.7    | C 36 | C 41 | H 41 | 119.3    |
| C 7  | C 6 | H 6  | 119.7    | C 47 | C 42 | C 43 | 117.0(3) |
| C 2  | C 7 | C 6  | 120.9(4) | C 47 | C 42 | C 35 | 124.2(3) |

|      |      |      |          |      |      |      |          |
|------|------|------|----------|------|------|------|----------|
| C 2  | C 7  | H 7  | 119.5    | C 43 | C 42 | C 35 | 118.7(3) |
| C 6  | C 7  | H 7  | 119.5    | C 44 | C 43 | C 42 | 121.9(3) |
| C 13 | C 8  | C 9  | 118.0(3) | C 44 | C 43 | H 43 | 119.0    |
| C 13 | C 8  | C 1  | 123.6(3) | C 42 | C 43 | H 43 | 119.0    |
| C 9  | C 8  | C 1  | 118.4(3) | C 45 | C 44 | C 43 | 120.0(4) |
| C 10 | C 9  | C 8  | 121.1(3) | C 45 | C 44 | H 44 | 120.0    |
| C 10 | C 9  | H 9  | 119.4    | C 43 | C 44 | H 44 | 120.0    |
| C 8  | C 9  | H 9  | 119.4    | C 44 | C 45 | C 46 | 119.7(4) |
| C 9  | C 10 | C 11 | 120.1(3) | C 44 | C 45 | H 45 | 120.2    |
| C 9  | C 10 | H 10 | 119.9    | C 46 | C 45 | H 45 | 120.2    |
| C 11 | C 10 | H 10 | 119.9    | C 45 | C 46 | C 47 | 120.0(4) |
| C 12 | C 11 | C 10 | 119.3(3) | C 45 | C 46 | H 46 | 120.0    |
| C 12 | C 11 | H 11 | 120.4    | C 47 | C 46 | H 46 | 120.0    |
| C 10 | C 11 | H 11 | 120.4    | C 42 | C 47 | C 46 | 121.4(4) |
| C 11 | C 12 | C 13 | 120.7(3) | C 42 | C 47 | H 47 | 119.3    |
| C 11 | C 12 | H 12 | 119.7    | C 46 | C 47 | H 47 | 119.3    |
| C 13 | C 12 | H 12 | 119.7    | C 49 | C 48 | C 53 | 117.5(3) |
| C 8  | C 13 | C 12 | 120.8(3) | C 49 | C 48 | C 35 | 122.9(3) |
| C 8  | C 13 | H 13 | 119.6    | C 53 | C 48 | C 35 | 119.6(3) |
| C 12 | C 13 | H 13 | 119.6    | C 48 | C 49 | C 50 | 121.3(3) |
| C 19 | C 14 | C 15 | 116.8(3) | C 48 | C 49 | H 49 | 119.4    |
| C 19 | C 14 | C 1  | 124.4(3) | C 50 | C 49 | H 49 | 119.4    |
| C 15 | C 14 | C 1  | 118.8(3) | C 51 | C 50 | C 49 | 120.5(4) |
| C 16 | C 15 | C 14 | 121.4(3) | C 51 | C 50 | H 50 | 119.8    |
| C 16 | C 15 | H 15 | 119.3    | C 49 | C 50 | H 50 | 119.8    |
| C 14 | C 15 | H 15 | 119.3    | C 50 | C 51 | C 52 | 118.9(4) |
| C 15 | C 16 | C 17 | 120.8(3) | C 50 | C 51 | H 51 | 120.5    |
| C 15 | C 16 | H 16 | 119.6    | C 52 | C 51 | H 51 | 120.5    |
| C 17 | C 16 | H 16 | 119.6    | C 53 | C 52 | C 51 | 120.8(4) |

|      |      |      |          |       |      |       |          |
|------|------|------|----------|-------|------|-------|----------|
| C 16 | C 17 | C 18 | 118.5(4) | C 53  | C 52 | H 52  | 119.6    |
| C 16 | C 17 | H 17 | 120.7    | C 51  | C 52 | H 52  | 119.6    |
| C 18 | C 17 | H 17 | 120.7    | C 52  | C 53 | C 48  | 121.0(4) |
| C 19 | C 18 | C 17 | 120.8(3) | C 52  | C 53 | H 53  | 119.5    |
| C 19 | C 18 | H 18 | 119.6    | C 48  | C 53 | H 53  | 119.5    |
| C 17 | C 18 | H 18 | 119.6    | N 3   | C 54 | C 55  | 122.3(4) |
| C 18 | C 19 | C 14 | 121.7(3) | N 3   | C 54 | H 54  | 118.8    |
| C 18 | C 19 | H 19 | 119.2    | C 55  | C 54 | H 54  | 118.8    |
| C 14 | C 19 | H 19 | 119.2    | C 56  | C 55 | C 54  | 118.8(4) |
| C 21 | C 20 | C 25 | 117.6(3) | C 56  | C 55 | H 55  | 120.6    |
| C 21 | C 20 | C 1  | 123.7(3) | C 54  | C 55 | H 55  | 120.6    |
| C 25 | C 20 | C 1  | 118.6(3) | C 57  | C 56 | C 55  | 119.2(4) |
| C 20 | C 21 | C 22 | 121.7(3) | C 57  | C 56 | H 56  | 120.4    |
| C 20 | C 21 | H 21 | 119.1    | C 55  | C 56 | H 56  | 120.4    |
| C 22 | C 21 | H 21 | 119.1    | C 58  | C 57 | C 56  | 118.8(4) |
| C 23 | C 22 | C 21 | 119.6(3) | C 58  | C 57 | H 57  | 120.6    |
| C 23 | C 22 | H 22 | 120.2    | C 56  | C 57 | H 57  | 120.6    |
| C 21 | C 22 | H 22 | 120.2    | N 3   | C 58 | C 57  | 122.8(3) |
| C 22 | C 23 | C 24 | 120.6(3) | N 3   | C 58 | H 58  | 118.6    |
| C 22 | C 23 | N 1  | 119.2(3) | C 57  | C 58 | H 58  | 118.6    |
| C 24 | C 23 | N 1  | 120.2(3) | C 60  | C 59 | H 59A | 109.5    |
| C 23 | C 24 | C 25 | 119.0(3) | C 60  | C 59 | H 59B | 109.5    |
| C 23 | C 24 | H 24 | 120.5    | H 59A | C 59 | H 59B | 109.5    |
| C 25 | C 24 | H 24 | 120.5    | C 60  | C 59 | H 59C | 109.5    |
| C 24 | C 25 | C 20 | 121.5(3) | H 59A | C 59 | H 59C | 109.5    |
| C 24 | C 25 | H 25 | 119.2    | H 59B | C 59 | H 59C | 109.5    |
| C 20 | C 25 | H 25 | 119.2    | O 2   | C 60 | O 1   | 122.5(4) |
| C 27 | C 26 | N 1  | 106.8(3) | O 2   | C 60 | C 59  | 125.6(4) |
| C 27 | C 26 | H 26 | 126.6    | O 1   | C 60 | C 59  | 111.9(4) |

|      |      |      |          |       |      |       |          |
|------|------|------|----------|-------|------|-------|----------|
| N 1  | C 26 | H 26 | 126.6    | O 1   | C 61 | C 62  | 113.6(3) |
| C 26 | C 27 | N 2  | 106.6(3) | O 1   | C 61 | H 61A | 108.8    |
| C 26 | C 27 | H 27 | 126.7    | C 62  | C 61 | H 61A | 108.8    |
| N 2  | C 27 | H 27 | 126.7    | O 1   | C 61 | H 61B | 108.8    |
| N 1  | C 28 | N 2  | 104.3(3) | C 62  | C 61 | H 61B | 108.8    |
| N 1  | C 28 | Pd 1 | 129.3(2) | H 61A | C 61 | H 61B | 107.7    |
| N 2  | C 28 | Pd 1 | 126.4(2) | C 61  | C 62 | H 62A | 109.5    |
| C 30 | C 29 | C 34 | 120.6(3) | C 61  | C 62 | H 62B | 109.5    |
| C 30 | C 29 | N 2  | 120.1(3) | H 62A | C 62 | H 62B | 109.5    |
| C 34 | C 29 | N 2  | 119.3(3) | C 61  | C 62 | H 62C | 109.5    |
| C 29 | C 30 | C 31 | 119.1(3) | H 62A | C 62 | H 62C | 109.5    |
| C 29 | C 30 | H 30 | 120.4    | H 62B | C 62 | H 62C | 109.5    |

**Table S20.** Torsion Angles for Complex **6**.

| A   | B   | C  | D   | Angle/°  | A   | B   | C   | D   | Angle/°  |
|-----|-----|----|-----|----------|-----|-----|-----|-----|----------|
| C28 | Pd1 | N3 | C54 | 54(9)    | C29 | N2  | C28 | Pd1 | 2.9(5)   |
| Cl1 | Pd1 | N3 | C54 | 137.6(3) | N3  | Pd1 | C28 | N1  | 162(9)   |
| Cl2 | Pd1 | N3 | C54 | 42.9(3)  | Cl1 | Pd1 | C28 | N1  | 78.2(3)  |
| C28 | Pd1 | N3 | C58 | 124(9)   | Cl2 | Pd1 | C28 | N1  | 101.3(3) |
| Cl1 | Pd1 | N3 | C58 | 40.3(3)  | N3  | Pd1 | C28 | N2  | 17(9)    |
| Cl2 | Pd1 | N3 | C58 | 139.2(3) | Cl1 | Pd1 | C28 | N2  | 100.8(3) |
| C14 | C1  | C2 | C7  | 15.9(4)  | Cl2 | Pd1 | C28 | N2  | 79.7(3)  |
| C8  | C1  | C2 | C7  | 102.4(4) | C28 | N2  | C29 | C30 | 124.6(4) |
| C20 | C1  | C2 | C7  | 137.7(3) | C27 | N2  | C29 | C30 | 58.7(5)  |
| C14 | C1  | C2 | C3  | 166.6(3) | C28 | N2  | C29 | C34 | 54.9(5)  |
| C8  | C1  | C2 | C3  | 75.1(4)  | C27 | N2  | C29 | C34 | 121.8(4) |
| C20 | C1  | C2 | C3  | 44.8(4)  | C34 | C29 | C30 | C31 | 0.6(5)   |
| C7  | C2  | C3 | C4  | 2.0(5)   | N2  | C29 | C30 | C31 | 178.9(3) |

|     |     |     |     |          |     |     |     |     |          |
|-----|-----|-----|-----|----------|-----|-----|-----|-----|----------|
| C1  | C2  | C3  | C4  | 175.7(3) | C29 | C30 | C31 | C32 | 0.2(5)   |
| C2  | C3  | C4  | C5  | 0.7(6)   | C30 | C31 | C32 | C33 | 0.2(5)   |
| C3  | C4  | C5  | C6  | 0.6(6)   | C30 | C31 | C32 | C35 | 178.2(3) |
| C4  | C5  | C6  | C7  | 0.5(6)   | C31 | C32 | C33 | C34 | 0.2(5)   |
| C3  | C2  | C7  | C6  | 2.0(5)   | C35 | C32 | C33 | C34 | 178.3(3) |
| C1  | C2  | C7  | C6  | 175.5(3) | C32 | C33 | C34 | C29 | 0.2(5)   |
| C5  | C6  | C7  | C2  | 0.8(6)   | C30 | C29 | C34 | C33 | 0.6(5)   |
| C14 | C1  | C8  | C13 | 128.1(3) | N2  | C29 | C34 | C33 | 178.9(3) |
| C20 | C1  | C8  | C13 | 111.0(4) | C31 | C32 | C35 | C36 | 96.1(4)  |
| C2  | C1  | C8  | C13 | 6.7(4)   | C33 | C32 | C35 | C36 | 81.9(4)  |
| C14 | C1  | C8  | C9  | 49.3(4)  | C31 | C32 | C35 | C48 | 144.4(3) |
| C20 | C1  | C8  | C9  | 71.6(4)  | C33 | C32 | C35 | C48 | 37.6(4)  |
| C2  | C1  | C8  | C9  | 170.7(3) | C31 | C32 | C35 | C42 | 22.5(4)  |
| C13 | C8  | C9  | C10 | 1.4(5)   | C33 | C32 | C35 | C42 | 159.4(3) |
| C1  | C8  | C9  | C10 | 179.0(3) | C48 | C35 | C36 | C37 | 105.3(4) |
| C8  | C9  | C10 | C11 | 1.9(5)   | C32 | C35 | C36 | C37 | 12.6(5)  |
| C9  | C10 | C11 | C12 | 0.6(5)   | C42 | C35 | C36 | C37 | 133.0(3) |
| C10 | C11 | C12 | C13 | 1.1(5)   | C48 | C35 | C36 | C41 | 73.4(4)  |
| C9  | C8  | C13 | C12 | 0.2(5)   | C32 | C35 | C36 | C41 | 168.6(3) |
| C1  | C8  | C13 | C12 | 177.2(3) | C42 | C35 | C36 | C41 | 48.2(4)  |
| C11 | C12 | C13 | C8  | 1.5(5)   | C41 | C36 | C37 | C38 | 1.8(5)   |
| C8  | C1  | C14 | C19 | 132.7(3) | C35 | C36 | C37 | C38 | 179.5(3) |
| C20 | C1  | C14 | C19 | 12.2(4)  | C36 | C37 | C38 | C39 | 1.6(6)   |
| C2  | C1  | C14 | C19 | 107.2(3) | C37 | C38 | C39 | C40 | 0.3(6)   |
| C8  | C1  | C14 | C15 | 46.8(4)  | C38 | C39 | C40 | C41 | 0.6(6)   |
| C20 | C1  | C14 | C15 | 167.4(3) | C39 | C40 | C41 | C36 | 0.4(6)   |
| C2  | C1  | C14 | C15 | 73.2(3)  | C37 | C36 | C41 | C40 | 0.8(5)   |
| C19 | C14 | C15 | C16 | 1.2(5)   | C35 | C36 | C41 | C40 | 179.6(3) |
| C1  | C14 | C15 | C16 | 179.3(3) | C36 | C35 | C42 | C47 | 138.8(3) |



|     |     |     |     |          |     |     |     |     |          |
|-----|-----|-----|-----|----------|-----|-----|-----|-----|----------|
| C14 | C15 | C16 | C17 | 0.6(5)   | C48 | C35 | C42 | C47 | 18.2(5)  |
| C15 | C16 | C17 | C18 | 0.2(5)   | C32 | C35 | C42 | C47 | 101.2(4) |
| C16 | C17 | C18 | C19 | 0.4(5)   | C36 | C35 | C42 | C43 | 41.5(4)  |
| C17 | C18 | C19 | C14 | 1.0(5)   | C48 | C35 | C42 | C43 | 162.1(3) |
| C15 | C14 | C19 | C18 | 1.3(5)   | C32 | C35 | C42 | C43 | 78.5(4)  |
| C1  | C14 | C19 | C18 | 179.2(3) | C47 | C42 | C43 | C44 | 0.0(5)   |
| C14 | C1  | C20 | C21 | 110.6(4) | C35 | C42 | C43 | C44 | 179.7(3) |
| C8  | C1  | C20 | C21 | 7.8(5)   | C42 | C43 | C44 | C45 | 0.1(5)   |
| C2  | C1  | C20 | C21 | 127.1(3) | C43 | C44 | C45 | C46 | 0.2(6)   |
| C14 | C1  | C20 | C25 | 71.0(4)  | C44 | C45 | C46 | C47 | 0.1(6)   |
| C8  | C1  | C20 | C25 | 170.7(3) | C43 | C42 | C47 | C46 | 0.2(5)   |
| C2  | C1  | C20 | C25 | 51.3(4)  | C35 | C42 | C47 | C46 | 179.5(3) |
| C25 | C20 | C21 | C22 | 1.3(5)   | C45 | C46 | C47 | C42 | 0.1(6)   |
| C1  | C20 | C21 | C22 | 179.8(3) | C36 | C35 | C48 | C49 | 5.1(4)   |
| C20 | C21 | C22 | C23 | 0.2(5)   | C32 | C35 | C48 | C49 | 124.6(3) |
| C21 | C22 | C23 | C24 | 0.9(5)   | C42 | C35 | C48 | C49 | 114.3(4) |
| C21 | C22 | C23 | N1  | 179.5(3) | C36 | C35 | C48 | C53 | 172.1(3) |
| C28 | N1  | C23 | C22 | 132.9(4) | C32 | C35 | C48 | C53 | 52.6(4)  |
| C26 | N1  | C23 | C22 | 44.5(5)  | C42 | C35 | C48 | C53 | 68.6(4)  |
| C28 | N1  | C23 | C24 | 45.7(5)  | C53 | C48 | C49 | C50 | 1.3(5)   |
| C26 | N1  | C23 | C24 | 136.9(3) | C35 | C48 | C49 | C50 | 178.5(3) |
| C22 | C23 | C24 | C25 | 0.0(5)   | C48 | C49 | C50 | C51 | 1.0(5)   |
| N1  | C23 | C24 | C25 | 178.6(3) | C49 | C50 | C51 | C52 | 2.0(6)   |
| C23 | C24 | C25 | C20 | 1.6(5)   | C50 | C51 | C52 | C53 | 0.8(6)   |
| C21 | C20 | C25 | C24 | 2.3(5)   | C51 | C52 | C53 | C48 | 1.5(6)   |
| C1  | C20 | C25 | C24 | 179.2(3) | C49 | C48 | C53 | C52 | 2.5(5)   |
| C28 | N1  | C26 | C27 | 1.5(4)   | C35 | C48 | C53 | C52 | 179.8(3) |
| C23 | N1  | C26 | C27 | 176.2(3) | C58 | N3  | C54 | C55 | 0.6(6)   |
| N1  | C26 | C27 | N2  | 0.9(4)   | Pd1 | N3  | C54 | C55 | 177.4(4) |

|     |    |     |     |          |     |     |     |     |          |
|-----|----|-----|-----|----------|-----|-----|-----|-----|----------|
| C28 | N2 | C27 | C26 | 0.1(4)   | N3  | C54 | C55 | C56 | 0.2(8)   |
| C29 | N2 | C27 | C26 | 177.1(3) | C54 | C55 | C56 | C57 | 0.3(8)   |
| C26 | N1 | C28 | N2  | 1.4(4)   | C55 | C56 | C57 | C58 | 0.6(8)   |
| C23 | N1 | C28 | N2  | 176.3(3) | C54 | N3  | C58 | C57 | 0.9(6)   |
| C26 | N1 | C28 | Pd1 | 179.4(3) | Pd1 | N3  | C58 | C57 | 177.0(3) |
| C23 | N1 | C28 | Pd1 | 2.9(5)   | C56 | C57 | C58 | N3  | 1.0(7)   |
| C27 | N2 | C28 | N1  | 0.8(4)   | C61 | O1  | C60 | O2  | 3.5(5)   |
| C29 | N2 | C28 | N1  | 176.3(3) | C61 | O1  | C60 | C59 | 177.0(3) |
| C27 | N2 | C28 | Pd1 | 180.0(2) | C60 | O1  | C61 | C62 | 79.5(5)  |

**Table S21.** Hydrogen Atom Coordinates ( $\text{\AA}\times 10^4$ ) and Isotropic Displacement Parameters ( $\text{\AA}^2\times 10^3$ ) for Complex **6**.

| Atom | x     | y     | z    | U(eq) |
|------|-------|-------|------|-------|
| H3   | 1637  | -540  | 3614 | 29    |
| H4   | -315  | -1540 | 3436 | 37    |
| H5   | -1733 | -2178 | 2077 | 36    |
| H6   | -1186 | -1789 | 913  | 36    |
| H7   | 765   | -786  | 1095 | 27    |
| H9   | 4983  | 270   | 2713 | 17    |
| H10  | 6114  | -840  | 3065 | 18    |
| H11  | 5259  | -2579 | 3287 | 20    |
| H12  | 3279  | -3175 | 3177 | 25    |
| H13  | 2167  | -2036 | 2889 | 20    |
| H15  | 2616  | -1060 | 1115 | 20    |
| H16  | 2850  | -527  | -114 | 24    |
| H17  | 3336  | 1279  | -267 | 24    |
| H18  | 3561  | 2538  | 837  | 23    |
| H19  | 3339  | 2014  | 2073 | 21    |
| H21  | 4623  | 660   | 4043 | 18    |

|     |       |       |       |    |
|-----|-------|-------|-------|----|
| H22 | 5223  | 2087  | 5120  | 18 |
| H24 | 2466  | 2997  | 3798  | 17 |
| H25 | 1845  | 1533  | 2739  | 19 |
| H26 | 6123  | 4191  | 5512  | 16 |
| H27 | 6133  | 5420  | 6656  | 18 |
| H30 | 4561  | 6654  | 6579  | 21 |
| H31 | 3878  | 7436  | 7492  | 20 |
| H33 | 2448  | 4528  | 8056  | 22 |
| H34 | 3121  | 3748  | 7153  | 20 |
| H37 | 4548  | 5874  | 9213  | 19 |
| H38 | 5870  | 6206  | 10591 | 25 |
| H39 | 5656  | 7217  | 11661 | 27 |
| H40 | 4093  | 7907  | 11309 | 25 |
| H41 | 2805  | 7616  | 9925  | 21 |
| H43 | 4321  | 8472  | 8865  | 22 |
| H44 | 4282  | 10156 | 8603  | 31 |
| H45 | 2490  | 10395 | 7875  | 36 |
| H46 | 736   | 8932  | 7419  | 42 |
| H47 | 777   | 7232  | 7689  | 30 |
| H49 | 1802  | 5551  | 9657  | 22 |
| H50 | -27   | 4290  | 9492  | 30 |
| H51 | -1535 | 3745  | 8172  | 36 |
| H52 | -1161 | 4399  | 6999  | 39 |
| H53 | 674   | 5606  | 7146  | 30 |
| H54 | -261  | 3887  | 5127  | 37 |
| H55 | -2295 | 3176  | 4823  | 57 |
| H56 | -3254 | 1326  | 4410  | 61 |
| H57 | -2137 | 238   | 4329  | 48 |
| H58 | -122  | 1018  | 4628  | 31 |

|      |      |      |      |    |
|------|------|------|------|----|
| H59A | 3221 | 5327 | 1481 | 62 |
| H59B | 3107 | 4531 | 697  | 62 |
| H59C | 3927 | 4497 | 1632 | 62 |
| H61A | -452 | 2520 | 152  | 45 |
| H61B | 8    | 2856 | 1154 | 45 |
| H62A | 568  | 1270 | 380  | 51 |
| H62B | -508 | 1008 | 721  | 51 |
| H62C | 827  | 1541 | 1368 | 51 |

**Table S22.** Crystal data and structure refinement for complex **7**.

|                                        |                                                                                                 |
|----------------------------------------|-------------------------------------------------------------------------------------------------|
| Identification code                    | <b>7</b>                                                                                        |
| Empirical formula                      | C <sub>118</sub> H <sub>92</sub> Br <sub>6</sub> Cl <sub>4</sub> N <sub>6</sub> Pd <sub>2</sub> |
| Formula weight                         | 2428.03                                                                                         |
| Temperature/K                          | 173(2)                                                                                          |
| Crystal system                         | Monoclinic                                                                                      |
| Space group                            | P 21                                                                                            |
| a/Å                                    | 9.2472(4)                                                                                       |
| b/Å                                    | 31.4274(13) Å                                                                                   |
| c/Å                                    | 17.7065(8) Å                                                                                    |
| $\alpha$ /°                            | 90                                                                                              |
| $\beta$ /°                             | 97.3590(10)                                                                                     |
| $\gamma$ /°                            | 90                                                                                              |
| Volume/Å <sup>3</sup>                  | 5103.4(4)                                                                                       |
| Z                                      | 2                                                                                               |
| $\rho_{\text{calc}}$ /cm <sup>3</sup>  | 1.580                                                                                           |
| $\mu$ /mm <sup>-1</sup>                | 2.859                                                                                           |
| F(000)                                 | 2424                                                                                            |
| Crystal size/mm <sup>3</sup>           | 0.18 × 0.17 × 0.16                                                                              |
| Radiation                              | MoK $\alpha$ ( $\lambda$ = 0.71073)                                                             |
| 2 $\theta$ range for data collection/° | 1.33 to 28.32                                                                                   |
| Index ranges                           | -12 ≤ h ≤ 12, -40 ≤ k ≤ 41, -23 ≤ l ≤ 20                                                        |

|                                             |                           |
|---------------------------------------------|---------------------------|
| Reflections collected                       | 38498                     |
| Independent reflections                     | 23942 [R(int) = 0.0485]   |
| Data/restraints/parameters                  | 23942 / 397 / 1226        |
| Goodness-of-fit on F <sup>2</sup>           | 1.041                     |
| Final R indexes [I ≥ 2σ (I)]                | R1 = 0.0653, wR2 = 0.1580 |
| Final R indexes [all data]                  | R1 = 0.0915, wR2 = 0.1735 |
| Largest diff. peak/hole / e Å <sup>-3</sup> | 2.793 -2.584              |

**Table S23.** Fractional Atomic Coordinates ( $\times 10^4$ ) and Equivalent Isotropic Displacement Parameters ( $\text{\AA}^2 \times 10^3$ ) for Complex 7.  $U_{\text{eq}}$  is defined as 1/3 of the trace of the orthogonalised  $U_{\text{ij}}$  tensor.

| Atom | <i>x</i> | <i>y</i> | <i>z</i> | $U(\text{eq})$ |
|------|----------|----------|----------|----------------|
| H2   | 5095     | 3046     | -144     | 16             |
| H3   | 3738     | 3038     | 986      | 20             |
| H5   | 8389     | 3031     | -68      | 16             |
| H6   | 10011    | 2864     | -929     | 16             |
| H8   | 8399     | 1672     | -1109    | 16             |
| H9   | 6706     | 1842     | -287     | 16             |
| H12  | 13440    | 2135     | -1325    | 18             |
| H13  | 15093    | 2663     | -1516    | 20             |
| H14  | 14277    | 3330     | -2014    | 20             |
| H15  | 11784    | 3419     | -2447    | 18             |
| H16  | 10135    | 2889     | -2287    | 15             |
| H18  | 11835    | 1912     | -327     | 26             |
| H19  | 13141    | 1304     | 108      | 31             |
| H20  | 13238    | 720      | -688     | 32             |
| H21  | 11902    | 716      | -1889    | 29             |
| H22  | 10611    | 1314     | -2340    | 18             |
| H24  | 7492     | 2184     | -2257    | 17             |
| H25  | 6356     | 2183     | -3512    | 23             |
| H26  | 7658     | 2040     | -4518    | 26             |
| H27  | 10167    | 1900     | -4259    | 19             |
| H28  | 11354    | 1942     | -3027    | 18             |

**Table S24.** Anisotropic Displacement Parameters ( $\text{\AA}^2 \times 10^3$ ) for Complex 7. The Anisotropic displacement factor exponent takes the form:  $-2\pi^2[h^2a^2U_{11}+2hka*b*U_{12}+\dots]$ .

| Atom | U11   | U22   | U33   | U23   | U13   | U12    |
|------|-------|-------|-------|-------|-------|--------|
| Pd1  | 8(1)  | 17(1) | 8(1)  | 4(1)  | 3(1)  | -1(1)  |
| Br1  | 18(1) | 29(1) | 37(1) | 2(1)  | 0(1)  | 1(1)   |
| Br2  | 35(1) | 39(1) | 48(1) | 7(1)  | -1(1) | -10(1) |
| Br3  | 67(1) | 22(1) | 29(1) | 7(1)  | 15(1) | 6(1)   |
| N1   | 8(4)  | 15(4) | 12(4) | 3(3)  | 5(3)  | 2(3)   |
| N2   | 12(3) | 17(3) | 12(3) | 0(2)  | 4(2)  | 1(2)   |
| N3   | 22(5) | 10(4) | 18(5) | -2(4) | 2(4)  | 3(4)   |
| C1   | 11(3) | 17(3) | 9(3)  | 1(2)  | 6(2)  | -2(2)  |
| C2   | 9(5)  | 20(5) | 12(5) | 6(4)  | 1(4)  | 4(4)   |
| C3   | 18(3) | 19(3) | 14(3) | -1(2) | 3(2)  | 2(2)   |
| C4   | 15(2) | 17(2) | 10(2) | 1(2)  | 6(2)  | 0(2)   |
| C5   | 15(2) | 17(2) | 10(2) | 0(2)  | 6(2)  | 0(2)   |
| C6   | 15(2) | 17(2) | 10(2) | 1(2)  | 6(2)  | 0(2)   |
| C7   | 15(2) | 16(2) | 10(2) | 0(2)  | 5(2)  | 0(2)   |
| C8   | 16(2) | 17(2) | 10(2) | 1(2)  | 5(2)  | 0(2)   |
| C9   | 15(2) | 17(2) | 10(2) | 1(2)  | 6(2)  | 0(2)   |
| C10  | 9(3)  | 9(3)  | 6(3)  | 1(2)  | 3(2)  | 0(2)   |
| C11  | 12(4) | 13(4) | 7(4)  | -1(3) | 6(3)  | 4(3)   |
| C12  | 14(5) | 25(6) | 7(5)  | 2(4)  | 0(4)  | -1(5)  |
| C13  | 14(3) | 20(3) | 14(3) | -2(2) | 1(2)  | -1(2)  |
| C14  | 16(6) | 18(6) | 16(5) | -3(4) | 6(4)  | -12(5) |
| C15  | 21(6) | 15(5) | 12(5) | -3(4) | 12(4) | 1(4)   |
| C16  | 11(4) | 19(4) | 9(4)  | -4(3) | 6(3)  | 1(4)   |
| C17  | 6(5)  | 19(6) | 15(5) | 5(4)  | 4(4)  | 2(4)   |

|     |       |       |       |        |       |       |
|-----|-------|-------|-------|--------|-------|-------|
| C18 | 15(6) | 36(7) | 15(6) | 3(5)   | 4(5)  | -6(5) |
| C19 | 34(8) | 25(6) | 18(6) | 4(5)   | -1(5) | 0(6)  |
| C20 | 21(6) | 26(7) | 33(7) | 3(5)   | 10(5) | 4(5)  |
| C21 | 31(7) | 11(5) | 31(7) | 0(5)   | 8(5)  | 1(5)  |
| C22 | 17(6) | 18(5) | 11(5) | 9(4)   | 7(4)  | 1(4)  |
| C23 | 19(6) | 10(5) | 10(5) | -1(4)  | 5(4)  | -4(4) |
| C24 | 14(5) | 10(5) | 19(5) | -2(4)  | 5(4)  | -1(4) |
| C25 | 10(5) | 30(6) | 16(5) | -1(5)  | 0(4)  | -3(5) |
| C26 | 21(6) | 27(6) | 16(5) | 2(5)   | -4(5) | -6(5) |
| C27 | 14(5) | 27(6) | 9(4)  | 2(5)   | 7(4)  | -3(5) |
| C28 | 9(5)  | 24(6) | 13(5) | -5(4)  | 6(4)  | -3(4) |
| C29 | 6(3)  | 22(3) | 10(2) | -1(2)  | 4(2)  | 1(2)  |
| C30 | 6(2)  | 22(3) | 11(2) | -1(2)  | 3(2)  | 1(2)  |
| C31 | 6(2)  | 22(2) | 10(2) | -1(2)  | 3(2)  | 1(2)  |
| C32 | 6(2)  | 23(3) | 11(2) | -1(2)  | 3(2)  | 2(2)  |
| C33 | 6(3)  | 23(3) | 10(2) | -1(2)  | 3(2)  | 1(2)  |
| C34 | 10(5) | 26(6) | 6(5)  | 3(4)   | 1(4)  | 1(4)  |
| C35 | 9(3)  | 10(3) | 8(3)  | 0(2)   | 3(2)  | -2(2) |
| C36 | 7(4)  | 15(4) | 6(4)  | -1(3)  | 2(3)  | 3(3)  |
| C37 | 12(5) | 27(6) | 8(5)  | 6(4)   | 6(4)  | 0(4)  |
| C38 | 11(4) | 22(5) | 20(4) | -2(4)  | 5(4)  | 1(4)  |
| C39 | 16(5) | 27(6) | 6(5)  | -6(4)  | -1(4) | -2(5) |
| C40 | 18(4) | 30(5) | 7(4)  | -1(4)  | 5(4)  | -1(4) |
| C41 | 10(5) | 23(5) | 12(5) | 1(4)   | 6(4)  | -4(4) |
| C42 | 10(5) | 18(5) | 15(5) | 2(4)   | 4(4)  | -2(4) |
| C43 | 23(6) | 12(5) | 12(5) | -3(4)  | 3(4)  | 1(4)  |
| C44 | 19(6) | 21(6) | 29(6) | 4(5)   | -7(5) | 2(5)  |
| C45 | 24(7) | 21(6) | 48(8) | 1(6)   | 13(6) | 5(5)  |
| C46 | 22(6) | 24(6) | 34(7) | -12(5) | 11(5) | 7(5)  |

|      |       |       |       |       |       |        |
|------|-------|-------|-------|-------|-------|--------|
| C47  | 28(7) | 18(5) | 16(5) | -3(4) | 6(5)  | 7(5)   |
| C48  | 13(2) | 21(2) | 11(2) | -2(2) | 5(2)  | -3(2)  |
| C49  | 13(2) | 21(2) | 11(2) | -2(2) | 5(2)  | -3(2)  |
| C50  | 13(2) | 22(2) | 11(2) | -2(2) | 4(2)  | -2(2)  |
| C51  | 13(2) | 22(2) | 12(2) | -2(2) | 4(2)  | -3(2)  |
| C52  | 13(2) | 22(2) | 12(2) | -2(2) | 4(2)  | -3(2)  |
| C53  | 13(2) | 21(2) | 12(2) | -2(2) | 4(2)  | -3(2)  |
| C107 | 21(6) | 11(5) | 15(5) | 2(4)  | 5(4)  | 1(4)   |
| C108 | 33(7) | 25(6) | 7(5)  | 2(4)  | 5(5)  | 9(5)   |
| C109 | 30(7) | 25(7) | 33(7) | -8(6) | -5(6) | 15(6)  |
| C110 | 18(6) | 16(6) | 38(7) | -1(5) | 12(5) | 3(5)   |
| C111 | 16(6) | 18(6) | 28(6) | -8(5) | 8(5)  | 3(5)   |
| Pd2  | 8(1)  | 18(1) | 10(1) | 0(1)  | 2(1)  | -4(1)  |
| Br4  | 30(1) | 33(1) | 48(1) | -4(1) | -2(1) | 6(1)   |
| Br5  | 19(1) | 37(1) | 40(1) | 4(1)  | -1(1) | -3(1)  |
| Br6  | 61(1) | 24(1) | 33(1) | -7(1) | 10(1) | -3(1)  |
| N4   | 5(4)  | 18(4) | 7(4)  | -4(3) | -1(3) | -6(3)  |
| N5   | 9(3)  | 11(3) | 7(2)  | -1(2) | 4(2)  | -1(2)  |
| N6   | 14(5) | 31(6) | 20(5) | -2(4) | 4(4)  | -10(4) |
| C54  | 12(3) | 15(3) | 12(3) | 1(2)  | 3(2)  | 0(2)   |
| C55  | 19(6) | 16(5) | 10(5) | -2(4) | 6(4)  | -4(4)  |
| C56  | 12(5) | 24(6) | 11(5) | -4(4) | 5(4)  | -7(4)  |
| C57  | 10(2) | 14(2) | 7(2)  | 1(2)  | 3(2)  | 0(2)   |
| C58  | 10(2) | 14(2) | 8(2)  | 1(2)  | 3(2)  | 0(2)   |
| C59  | 10(2) | 14(2) | 7(2)  | 1(2)  | 4(2)  | 0(2)   |
| C60  | 10(2) | 13(2) | 7(2)  | 1(2)  | 3(2)  | 0(2)   |
| C61  | 10(2) | 14(2) | 7(2)  | 1(2)  | 3(2)  | 0(2)   |
| C62  | 10(2) | 14(2) | 8(2)  | 1(2)  | 3(2)  | -1(2)  |
| C63  | 3(4)  | 11(4) | 6(4)  | -1(3) | 1(3)  | 2(3)   |



|     |       |       |       |        |       |        |
|-----|-------|-------|-------|--------|-------|--------|
| C64 | 8(3)  | 11(3) | 7(3)  | 1(2)   | 4(2)  | 1(2)   |
| C65 | 13(5) | 13(5) | 15(5) | 1(4)   | 5(4)  | 2(4)   |
| C66 | 17(6) | 15(5) | 23(6) | 3(4)   | 9(4)  | 10(4)  |
| C67 | 10(5) | 31(6) | 7(5)  | -5(4)  | 3(4)  | 9(5)   |
| C68 | 9(4)  | 20(4) | 12(4) | 0(4)   | 1(3)  | -3(4)  |
| C69 | 8(5)  | 13(5) | 8(4)  | 0(4)   | -2(4) | 2(4)   |
| C70 | 9(2)  | 13(2) | 9(2)  | 1(2)   | 3(2)  | 0(2)   |
| C71 | 10(2) | 13(2) | 9(2)  | 2(2)   | 3(2)  | 0(2)   |
| C72 | 10(2) | 14(2) | 10(2) | 2(2)   | 3(2)  | -1(2)  |
| C73 | 10(2) | 14(2) | 10(2) | 2(2)   | 3(2)  | -1(2)  |
| C74 | 10(2) | 13(2) | 10(2) | 2(2)   | 3(2)  | -1(2)  |
| C75 | 9(2)  | 13(2) | 9(2)  | 1(2)   | 3(2)  | 0(2)   |
| C76 | 7(4)  | 15(4) | 9(4)  | -1(3)  | 4(3)  | 1(3)   |
| C77 | 14(6) | 21(6) | 14(5) | 5(4)   | 1(4)  | 0(5)   |
| C78 | 23(5) | 16(4) | 12(4) | 8(4)   | 8(4)  | 2(4)   |
| C79 | 17(6) | 11(5) | 36(7) | 1(5)   | 8(5)  | 1(4)   |
| C80 | 10(5) | 21(6) | 23(6) | -1(5)  | 0(4)  | -2(5)  |
| C81 | 10(5) | 11(5) | 13(5) | 1(4)   | -3(4) | 1(4)   |
| C82 | 9(4)  | 20(4) | 9(4)  | -2(3)  | 6(3)  | -2(4)  |
| C83 | 16(6) | 19(5) | 21(6) | 8(4)   | 12(5) | 4(5)   |
| C84 | 22(6) | 24(6) | 16(5) | 3(5)   | 13(4) | 10(5)  |
| C85 | 8(5)  | 21(5) | 3(4)  | 0(4)   | 2(4)  | 5(4)   |
| C86 | 13(5) | 28(6) | 13(5) | 1(4)   | 1(4)  | 7(5)   |
| C87 | 19(4) | 18(4) | 11(4) | 3(3)   | 8(4)  | 1(4)   |
| C88 | 12(5) | 18(5) | 9(5)  | 5(4)   | 2(4)  | -1(4)  |
| C89 | 13(6) | 30(6) | 9(5)  | -4(4)  | 4(4)  | -3(5)  |
| C90 | 31(7) | 33(7) | 13(6) | -2(5)  | 4(5)  | -8(6)  |
| C91 | 30(7) | 49(9) | 19(6) | -12(6) | -2(5) | 0(6)   |
| C92 | 35(8) | 35(7) | 27(7) | -15(6) | 0(6)  | -15(6) |

|      |        |         |         |         |        |         |
|------|--------|---------|---------|---------|--------|---------|
| C93  | 33(7)  | 22(6)   | 32(7)   | -7(5)   | 8(6)   | -1(6)   |
| C94  | 12(5)  | 21(5)   | 15(5)   | 1(4)    | 2(4)   | -5(4)   |
| C95  | 12(3)  | 16(3)   | 9(3)    | 2(2)    | 5(2)   | 1(2)    |
| C96  | 13(6)  | 35(7)   | 13(5)   | 8(5)    | 1(4)   | -2(5)   |
| C97  | 20(3)  | 26(3)   | 20(3)   | 4(2)    | 5(2)   | -1(2)   |
| C98  | 20(6)  | 43(8)   | 17(6)   | 19(5)   | 10(5)  | 13(6)   |
| C99  | 20(3)  | 21(3)   | 18(3)   | 1(2)    | 5(2)   | 1(2)    |
| C100 | 14(3)  | 17(3)   | 14(3)   | 0(2)    | 4(2)   | -1(2)   |
| C101 | 7(3)   | 10(3)   | 7(3)    | 2(2)    | 3(2)   | 1(2)    |
| C102 | 18(6)  | 22(6)   | 13(5)   | 5(4)    | 8(4)   | 0(5)    |
| C103 | 14(6)  | 26(6)   | 20(6)   | 8(5)    | -3(5)  | -4(5)   |
| C104 | 15(6)  | 22(6)   | 15(5)   | -4(4)   | -2(4)  | 8(5)    |
| C105 | 16(5)  | 23(6)   | 6(4)    | 2(4)    | 5(4)   | 7(5)    |
| C106 | 14(5)  | 16(5)   | 12(5)   | -1(4)   | 1(4)   | -2(4)   |
| C112 | 26(7)  | 37(7)   | 12(6)   | 3(5)    | -4(5)  | -6(6)   |
| C113 | 41(8)  | 26(7)   | 15(6)   | -4(5)   | -1(5)  | -5(6)   |
| C114 | 29(7)  | 39(8)   | 24(7)   | 4(6)    | 1(6)   | -14(6)  |
| C115 | 30(8)  | 34(7)   | 29(7)   | 3(6)    | 9(6)   | -11(6)  |
| C116 | 26(7)  | 23(6)   | 28(7)   | -6(5)   | 9(5)   | -6(5)   |
| Cl1  | 192(8) | 117(5)  | 130(6)  | 2(5)    | 85(6)  | -40(6)  |
| Cl2  | 90(4)  | 91(4)   | 124(5)  | -32(4)  | 32(4)  | -35(4)  |
| C117 | 42(11) | 82(14)  | 86(15)  | -27(12) | 31(10) | -15(10) |
| Cl3  | 73(4)  | 159(6)  | 92(4)   | 59(4)   | 25(3)  | 23(4)   |
| Cl4  | 85(4)  | 142(6)  | 181(7)  | 95(6)   | 65(5)  | 18(4)   |
| C118 | 94(19) | 110(20) | 140(20) | 54(19)  | 55(18) | -11(17) |

**Table S25.** Bond Lengths for Complex 7.

| Atom | Atom | Length/Å | Atom | Atom | Length/Å |
|------|------|----------|------|------|----------|
|------|------|----------|------|------|----------|

|     |      |            |     |      |            |
|-----|------|------------|-----|------|------------|
| Pd1 | C1   | 1.951(11)  | Pd2 | Br4  | 2.4201(16) |
|     |      |            |     |      | )          |
| Pd1 | N3   | 2.108(9)   | Br6 | C113 | 1.872(13)  |
| Pd1 | Br2  | 2.4046(16) | N4  | C54  | 1.352(13)  |
| Pd1 | Br1  | 2.4069(15) | N4  | C56  | 1.382(13)  |
| Br3 | C108 | 1.904(12)  | N4  | C57  | 1.440(12)  |
| N1  | C1   | 1.346(13)  | N5  | C54  | 1.368(13)  |
| N1  | C2   | 1.374(13)  | N5  | C55  | 1.372(14)  |
| N1  | C4   | 1.447(13)  | N5  | C82  | 1.449(12)  |
| N2  | C3   | 1.377(14)  | N6  | C112 | 1.310(16)  |
| N2  | C1   | 1.383(13)  | N6  | C116 | 1.354(16)  |
| N2  | C29  | 1.416(13)  | C55 | C56  | 1.342(14)  |
| N3  | C107 | 1.362(14)  | C55 | H55  | 0.9500     |
| N3  | C111 | 1.366(14)  | C56 | H56  | 0.9500     |
| C2  | C3   | 1.365(14)  | C57 | C58  | 1.390(14)  |
| C2  | H2   | 0.9500     | C57 | C62  | 1.399(14)  |
| C3  | H3   | 0.9500     | C58 | C59  | 1.433(13)  |
| C4  | C5   | 1.375(15)  | C58 | H58  | 0.9500     |
| C4  | C9   | 1.385(15)  | C59 | C60  | 1.364(14)  |
| C5  | C6   | 1.384(14)  | C59 | H59  | 0.9500     |
| C5  | H5   | 0.9500     | C60 | C61  | 1.380(14)  |
| C6  | C7   | 1.393(15)  | C60 | C63  | 1.572(13)  |
| C6  | H6   | 0.9500     | C61 | C62  | 1.401(13)  |
| C7  | C8   | 1.382(15)  | C61 | H61  | 0.9500     |
| C7  | C10  | 1.559(13)  | C62 | H62  | 0.9500     |
| C8  | C9   | 1.386(13)  | C63 | C70  | 1.524(13)  |
| C8  | H8   | 0.9500     | C63 | C76  | 1.526(15)  |
| C9  | H9   | 0.9500     | C63 | C64  | 1.563(13)  |
| C10 | C23  | 1.536(14)  | C64 | C65  | 1.377(14)  |

|     |     |           |     |     |           |
|-----|-----|-----------|-----|-----|-----------|
| C10 | C11 | 1.544(14) | C64 | C69 | 1.412(14) |
| C10 | C17 | 1.564(15) | C65 | C66 | 1.381(15) |
| C11 | C16 | 1.406(15) | C65 | H65 | 0.9500    |
| C11 | C12 | 1.417(15) | C66 | C67 | 1.342(17) |
| C12 | C13 | 1.375(15) | C66 | H66 | 0.9500    |
| C12 | H12 | 0.9500    | C67 | C68 | 1.424(15) |
| C13 | C14 | 1.403(16) | C67 | H67 | 0.9500    |
| C13 | H13 | 0.9500    | C68 | C69 | 1.366(14) |
| C14 | C15 | 1.395(16) | C68 | H68 | 0.9500    |
| C14 | H14 | 0.9500    | C69 | H69 | 0.9500    |
| C15 | C16 | 1.371(15) | C70 | C75 | 1.395(14) |
| C15 | H15 | 0.9500    | C70 | C71 | 1.399(14) |
| C16 | H16 | 0.9500    | C71 | C72 | 1.391(14) |
| C17 | C22 | 1.388(16) | C71 | H71 | 0.9500    |
| C17 | C18 | 1.413(16) | C72 | C73 | 1.391(14) |
| C18 | C19 | 1.388(18) | C72 | H72 | 0.9500    |
| C18 | H18 | 0.9500    | C73 | C74 | 1.369(14) |
| C19 | C20 | 1.378(17) | C73 | H73 | 0.9500    |
| C19 | H19 | 0.9500    | C74 | C75 | 1.397(14) |
| C20 | C21 | 1.370(18) | C74 | H74 | 0.9500    |
| C20 | H20 | 0.9500    | C75 | H75 | 0.9500    |
| C21 | C22 | 1.374(16) | C76 | C81 | 1.385(15) |
| C21 | H21 | 0.9500    | C76 | C77 | 1.424(15) |
| C22 | H22 | 0.9500    | C77 | C78 | 1.390(17) |
| C23 | C28 | 1.403(14) | C77 | H77 | 0.9500    |
| C23 | C24 | 1.405(16) | C78 | C79 | 1.399(17) |
| C24 | C25 | 1.400(15) | C78 | H78 | 0.9500    |
| C24 | H24 | 0.9500    | C79 | C80 | 1.385(16) |
| C25 | C26 | 1.369(16) | C79 | H79 | 0.9500    |

|     |     |           |     |      |           |
|-----|-----|-----------|-----|------|-----------|
| C25 | H25 | 0.9500    | C80 | C81  | 1.425(15) |
| C26 | C27 | 1.392(16) | C80 | H80  | 0.9500    |
| C26 | H26 | 0.9500    | C81 | H81  | 0.9500    |
| C27 | C28 | 1.385(14) | C82 | C87  | 1.372(15) |
| C27 | H27 | 0.9500    | C82 | C83  | 1.384(15) |
| C28 | H28 | 0.9500    | C83 | C84  | 1.387(14) |
| C29 | C30 | 1.369(14) | C83 | H83  | 0.9500    |
| C29 | C34 | 1.392(15) | C84 | C85  | 1.434(14) |
| C30 | C31 | 1.407(14) | C84 | H84  | 0.9500    |
| C30 | H30 | 0.9500    | C85 | C86  | 1.384(15) |
| C31 | C32 | 1.414(15) | C85 | C88  | 1.537(14) |
| C31 | H31 | 0.9500    | C86 | C87  | 1.379(14) |
| C32 | C33 | 1.385(14) | C86 | H86  | 0.9500    |
| C32 | C35 | 1.537(13) | C87 | H87  | 0.9500    |
| C33 | C34 | 1.391(14) | C88 | C95  | 1.540(15) |
| C33 | H33 | 0.9500    | C88 | C101 | 1.541(14) |
| C34 | H34 | 0.9500    | C88 | C89  | 1.563(16) |
| C35 | C48 | 1.548(14) | C89 | C94  | 1.393(16) |
| C35 | C36 | 1.548(13) | C89 | C90  | 1.416(16) |
| C35 | C42 | 1.572(15) | C90 | C91  | 1.341(19) |
| C36 | C41 | 1.396(13) | C90 | H90  | 0.9500    |
| C36 | C37 | 1.402(15) | C91 | C92  | 1.41(2)   |
| C37 | C38 | 1.364(15) | C91 | H91  | 0.9500    |
| C37 | H37 | 0.9500    | C92 | C93  | 1.375(18) |
| C38 | C39 | 1.390(15) | C92 | H92  | 0.9500    |
| C38 | H38 | 0.9500    | C93 | C94  | 1.371(16) |
| C39 | C40 | 1.389(16) | C93 | H93  | 0.9500    |
| C39 | H39 | 0.9500    | C94 | H94  | 0.9500    |
| C40 | C41 | 1.382(15) | C95 | C96  | 1.396(15) |

|      |      |           |      |      |           |
|------|------|-----------|------|------|-----------|
| C40  | H40  | 0.9500    | C95  | C100 | 1.401(15) |
| C41  | H41  | 0.9500    | C96  | C97  | 1.396(17) |
| C42  | C47  | 1.373(15) | C96  | H96  | 0.9500    |
| C42  | C43  | 1.378(15) | C97  | C98  | 1.370(19) |
| C43  | C44  | 1.400(16) | C97  | H97  | 0.9500    |
| C43  | H43  | 0.9500    | C98  | C99  | 1.401(18) |
| C44  | C45  | 1.361(18) | C98  | H98  | 0.9500    |
| C44  | H44  | 0.9500    | C99  | C100 | 1.374(16) |
| C45  | C46  | 1.413(19) | C99  | H99  | 0.9500    |
| C45  | H45  | 0.9500    | C100 | H100 | 0.9500    |
| C46  | C47  | 1.383(16) | C101 | C102 | 1.374(15) |
| C46  | H46  | 0.9500    | C101 | C106 | 1.400(13) |
| C47  | H47  | 0.9500    | C102 | C103 | 1.404(15) |
| C48  | C53  | 1.382(16) | C102 | H102 | 0.9500    |
| C48  | C49  | 1.386(16) | C103 | C104 | 1.367(16) |
| C49  | C50  | 1.402(15) | C103 | H103 | 0.9500    |
| C49  | H49  | 0.9500    | C104 | C105 | 1.402(16) |
| C50  | C51  | 1.341(15) | C104 | H104 | 0.9500    |
| C50  | H50  | 0.9500    | C105 | C106 | 1.390(14) |
| C51  | C52  | 1.406(16) | C105 | H105 | 0.9500    |
| C51  | H51  | 0.9500    | C106 | H106 | 0.9500    |
| C52  | C53  | 1.411(15) | C112 | C113 | 1.410(18) |
| C52  | H52  | 0.9500    | C112 | H112 | 0.9500    |
| C53  | H53  | 0.9500    | C114 | H114 | 0.9500    |
| C107 | C108 | 1.358(16) | C115 | C116 | 1.374(18) |
| C107 | H107 | 0.9500    | C115 | H115 | 0.9500    |
| C108 | C109 | 1.384(18) | C116 | H116 | 0.9500    |
| C109 | C110 | 1.386(18) | C11  | C117 | 1.78(2)   |
| C109 | H109 | 0.9500    | C12  | C117 | 1.76(2)   |

|      |      |            |      |       |         |
|------|------|------------|------|-------|---------|
| C110 | C111 | 1.367(17)  | C117 | H11'  | 0.9900  |
| C110 | H110 | 0.9500     | C117 | H11'' | 0.9900  |
| C111 | H111 | 0.9500     | Cl3  | C118  | 1.73(3) |
| Pd2  | C54  | 1.934(11)  | Cl4  | C118  | 1.71(3) |
| Pd2  | N6   | 2.100(10)  | C118 | H18'' | 0.9900  |
| Pd2  | Br5  | 2.4101(16) | C118 | H18'  | 0.9900  |

**Table S26.** Bond Angles for Complex 7

| Atom | Atom | Atom | Angle/°   | Atom | Atom | Atom | Angle/°   |
|------|------|------|-----------|------|------|------|-----------|
| C1   | Pd1  | N3   | 176.3(4)  | C54  | N4   | C56  | 111.7(8)  |
| C1   | Pd1  | Br2  | 87.3(3)   | C54  | N4   | C57  | 124.7(9)  |
| N3   | Pd1  | Br2  | 94.2(3)   | C56  | N4   | C57  | 123.6(8)  |
| C1   | Pd1  | Br1  | 86.1(3)   | C54  | N5   | C55  | 110.9(8)  |
| N3   | Pd1  | Br1  | 92.8(3)   | C54  | N5   | C82  | 122.1(9)  |
| Br2  | Pd1  | Br1  | 171.27(6) | C55  | N5   | C82  | 126.9(8)  |
| C1   | N1   | C2   | 110.5(8)  | C112 | N6   | C116 | 120.1(11) |
| C1   | N1   | C4   | 124.1(9)  | C112 | N6   | Pd2  | 119.7(8)  |
| C2   | N1   | C4   | 125.3(9)  | C116 | N6   | Pd2  | 120.3(8)  |
| C3   | N2   | C1   | 109.8(9)  | N4   | C54  | N5   | 103.7(9)  |
| C3   | N2   | C29  | 126.8(9)  | N4   | C54  | Pd2  | 130.6(8)  |
| C1   | N2   | C29  | 123.3(9)  | N5   | C54  | Pd2  | 125.7(7)  |
| C107 | N3   | C111 | 116.8(10) | C56  | C55  | N5   | 107.4(9)  |
| C107 | N3   | Pd1  | 122.5(8)  | C56  | C55  | H55  | 126.3     |
| C111 | N3   | Pd1  | 120.7(8)  | N5   | C55  | H55  | 126.3     |
| N1   | C1   | N2   | 105.5(9)  | C55  | C56  | N4   | 106.2(9)  |
| N1   | C1   | Pd1  | 126.1(7)  | C55  | C56  | H56  | 126.9     |
| N2   | C1   | Pd1  | 128.3(7)  | N4   | C56  | H56  | 126.9     |
| C3   | C2   | N1   | 107.5(9)  | C58  | C57  | C62  | 121.8(9)  |

|     |     |     |           |     |     |     |           |
|-----|-----|-----|-----------|-----|-----|-----|-----------|
| C3  | C2  | H2  | 126.2     | C58 | C57 | N4  | 118.1(9)  |
| N1  | C2  | H2  | 126.2     | C62 | C57 | N4  | 120.1(9)  |
| C2  | C3  | N2  | 106.6(10) | C57 | C58 | C59 | 117.8(9)  |
| C2  | C3  | H3  | 126.7     | C57 | C58 | H58 | 121.1     |
| N2  | C3  | H3  | 126.7     | C59 | C58 | H58 | 121.1     |
| C5  | C4  | C9  | 121.0(9)  | C60 | C59 | C58 | 120.8(9)  |
| C5  | C4  | N1  | 119.0(9)  | C60 | C59 | H59 | 119.6     |
| C9  | C4  | N1  | 120.0(9)  | C58 | C59 | H59 | 119.6     |
| C4  | C5  | C6  | 119.7(10) | C59 | C60 | C61 | 120.0(9)  |
| C4  | C5  | H5  | 120.1     | C59 | C60 | C63 | 123.2(9)  |
| C6  | C5  | H5  | 120.1     | C61 | C60 | C63 | 116.6(9)  |
| C5  | C6  | C7  | 120.7(10) | C60 | C61 | C62 | 121.7(10) |
| C5  | C6  | H6  | 119.6     | C60 | C61 | H61 | 119.2     |
| C7  | C6  | H6  | 119.6     | C62 | C61 | H61 | 119.2     |
| C8  | C7  | C6  | 118.1(9)  | C57 | C62 | C61 | 117.9(9)  |
| C8  | C7  | C10 | 118.0(9)  | C57 | C62 | H62 | 121.0     |
| C6  | C7  | C10 | 123.9(9)  | C61 | C62 | H62 | 121.0     |
| C7  | C8  | C9  | 122.1(10) | C70 | C63 | C76 | 112.6(8)  |
| C7  | C8  | H8  | 118.9     | C70 | C63 | C64 | 106.3(8)  |
| C9  | C8  | H8  | 118.9     | C76 | C63 | C64 | 111.7(8)  |
| C4  | C9  | C8  | 118.3(10) | C70 | C63 | C60 | 111.5(8)  |
| C4  | C9  | H9  | 120.8     | C76 | C63 | C60 | 106.0(7)  |
| C8  | C9  | H9  | 120.8     | C64 | C63 | C60 | 108.9(8)  |
| C23 | C10 | C11 | 105.6(8)  | C65 | C64 | C69 | 116.8(9)  |
| C23 | C10 | C7  | 111.0(9)  | C65 | C64 | C63 | 124.7(9)  |
| C11 | C10 | C7  | 111.5(8)  | C69 | C64 | C63 | 118.5(8)  |
| C23 | C10 | C17 | 111.3(8)  | C64 | C65 | C66 | 121.9(10) |
| C11 | C10 | C17 | 110.5(8)  | C64 | C65 | H65 | 119.1     |
| C7  | C10 | C17 | 106.9(8)  | C66 | C65 | H65 | 119.1     |



|     |     |     |           |     |     |     |           |
|-----|-----|-----|-----------|-----|-----|-----|-----------|
| C16 | C11 | C12 | 116.9(10) | C67 | C66 | C65 | 121.6(10) |
| C16 | C11 | C10 | 118.4(9)  | C67 | C66 | H66 | 119.2     |
| C12 | C11 | C10 | 124.7(9)  | C65 | C66 | H66 | 119.2     |
| C13 | C12 | C11 | 121.3(10) | C66 | C67 | C68 | 118.4(10) |
| C13 | C12 | H12 | 119.4     | C66 | C67 | H67 | 120.8     |
| C11 | C12 | H12 | 119.4     | C68 | C67 | H67 | 120.8     |
| C12 | C13 | C14 | 120.7(10) | C69 | C68 | C67 | 120.0(10) |
| C12 | C13 | H13 | 119.6     | C69 | C68 | H68 | 120.0     |
| C14 | C13 | H13 | 119.6     | C67 | C68 | H68 | 120.0     |
| C15 | C14 | C13 | 118.3(10) | C68 | C69 | C64 | 121.3(9)  |
| C15 | C14 | H14 | 120.8     | C68 | C69 | H69 | 119.3     |
| C13 | C14 | H14 | 120.8     | C64 | C69 | H69 | 119.3     |
| C16 | C15 | C14 | 120.9(11) | C75 | C70 | C71 | 116.4(9)  |
| C16 | C15 | H15 | 119.5     | C75 | C70 | C63 | 123.9(9)  |
| C14 | C15 | H15 | 119.5     | C71 | C70 | C63 | 119.7(9)  |
| C15 | C16 | C11 | 121.8(10) | C72 | C71 | C70 | 122.5(10) |
| C15 | C16 | H16 | 119.1     | C72 | C71 | H71 | 118.7     |
| C11 | C16 | H16 | 119.1     | C70 | C71 | H71 | 118.7     |
| C22 | C17 | C18 | 118.3(10) | C71 | C72 | C73 | 119.5(9)  |
| C22 | C17 | C10 | 124.0(10) | C71 | C72 | H72 | 120.2     |
| C18 | C17 | C10 | 117.6(10) | C73 | C72 | H72 | 120.2     |
| C19 | C18 | C17 | 119.5(12) | C74 | C73 | C72 | 119.0(9)  |
| C19 | C18 | H18 | 120.3     | C74 | C73 | H73 | 120.5     |
| C17 | C18 | H18 | 120.3     | C72 | C73 | H73 | 120.5     |
| C20 | C19 | C18 | 120.4(12) | C73 | C74 | C75 | 121.2(10) |
| C20 | C19 | H19 | 119.8     | C73 | C74 | H74 | 119.4     |
| C18 | C19 | H19 | 119.8     | C75 | C74 | H74 | 119.4     |
| C21 | C20 | C19 | 120.3(12) | C70 | C75 | C74 | 121.2(9)  |
| C21 | C20 | H20 | 119.9     | C70 | C75 | H75 | 119.4     |

|     |     |     |           |     |     |     |           |
|-----|-----|-----|-----------|-----|-----|-----|-----------|
| C19 | C20 | H20 | 119.9     | C74 | C75 | H75 | 119.4     |
| C20 | C21 | C22 | 120.2(11) | C81 | C76 | C77 | 118.0(10) |
| C20 | C21 | H21 | 119.9     | C81 | C76 | C63 | 122.2(9)  |
| C22 | C21 | H21 | 119.9     | C77 | C76 | C63 | 119.7(9)  |
| C21 | C22 | C17 | 121.2(11) | C78 | C77 | C76 | 120.3(10) |
| C21 | C22 | H22 | 119.4     | C78 | C77 | H77 | 119.8     |
| C17 | C22 | H22 | 119.4     | C76 | C77 | H77 | 119.8     |
| C28 | C23 | C24 | 116.8(10) | C77 | C78 | C79 | 121.7(10) |
| C28 | C23 | C10 | 119.5(10) | C77 | C78 | H78 | 119.2     |
| C24 | C23 | C10 | 123.4(9)  | C79 | C78 | H78 | 119.2     |
| C25 | C24 | C23 | 120.8(10) | C80 | C79 | C78 | 118.3(11) |
| C25 | C24 | H24 | 119.6     | C80 | C79 | H79 | 120.9     |
| C23 | C24 | H24 | 119.6     | C78 | C79 | H79 | 120.9     |
| C26 | C25 | C24 | 121.6(11) | C79 | C80 | C81 | 120.7(11) |
| C26 | C25 | H25 | 119.2     | C79 | C80 | H80 | 119.6     |
| C24 | C25 | H25 | 119.2     | C81 | C80 | H80 | 119.6     |
| C25 | C26 | C27 | 118.3(10) | C76 | C81 | C80 | 120.9(10) |
| C25 | C26 | H26 | 120.8     | C76 | C81 | H81 | 119.5     |
| C27 | C26 | H26 | 120.8     | C80 | C81 | H81 | 119.5     |
| C28 | C27 | C26 | 121.0(9)  | C87 | C82 | C83 | 120.5(9)  |
| C28 | C27 | H27 | 119.5     | C87 | C82 | N5  | 121.0(9)  |
| C26 | C27 | H27 | 119.5     | C83 | C82 | N5  | 118.5(9)  |
| C27 | C28 | C23 | 121.5(10) | C82 | C83 | C84 | 120.4(10) |
| C27 | C28 | H28 | 119.2     | C82 | C83 | H83 | 119.8     |
| C23 | C28 | H28 | 119.2     | C84 | C83 | H83 | 119.8     |
| C30 | C29 | C34 | 121.3(9)  | C83 | C84 | C85 | 119.9(10) |
| C30 | C29 | N2  | 118.1(9)  | C83 | C84 | H84 | 120.0     |
| C34 | C29 | N2  | 120.6(9)  | C85 | C84 | H84 | 120.0     |
| C29 | C30 | C31 | 119.7(10) | C86 | C85 | C84 | 117.0(9)  |

|     |     |     |           |      |     |      |           |
|-----|-----|-----|-----------|------|-----|------|-----------|
| C29 | C30 | H30 | 120.2     | C86  | C85 | C88  | 126.4(9)  |
| C31 | C30 | H30 | 120.2     | C84  | C85 | C88  | 116.6(9)  |
| C30 | C31 | C32 | 120.7(9)  | C87  | C86 | C85  | 122.6(10) |
| C30 | C31 | H31 | 119.7     | C87  | C86 | H86  | 118.7     |
| C32 | C31 | H31 | 119.7     | C85  | C86 | H86  | 118.7     |
| C33 | C32 | C31 | 116.9(9)  | C82  | C87 | C86  | 119.6(10) |
| C33 | C32 | C35 | 119.9(9)  | C82  | C87 | H87  | 120.2     |
| C31 | C32 | C35 | 123.0(9)  | C86  | C87 | H87  | 120.2     |
| C32 | C33 | C34 | 123.3(10) | C85  | C88 | C95  | 112.2(8)  |
| C32 | C33 | H33 | 118.3     | C85  | C88 | C101 | 111.0(9)  |
| C34 | C33 | H33 | 118.3     | C95  | C88 | C101 | 104.5(8)  |
| C29 | C34 | C33 | 118.0(10) | C85  | C88 | C89  | 104.4(8)  |
| C29 | C34 | H34 | 121.0     | C95  | C88 | C89  | 112.8(9)  |
| C33 | C34 | H34 | 121.0     | C101 | C88 | C89  | 112.3(8)  |
| C32 | C35 | C48 | 112.3(8)  | C94  | C89 | C90  | 115.9(11) |
| C32 | C35 | C36 | 110.8(8)  | C94  | C89 | C88  | 124.1(10) |
| C48 | C35 | C36 | 106.3(8)  | C90  | C89 | C88  | 119.7(10) |
| C32 | C35 | C42 | 104.7(8)  | C91  | C90 | C89  | 124.0(13) |
| C48 | C35 | C42 | 110.6(8)  | C91  | C90 | H90  | 118.0     |
| C36 | C35 | C42 | 112.2(8)  | C89  | C90 | H90  | 118.0     |
| C41 | C36 | C37 | 116.7(9)  | C90  | C91 | C92  | 118.8(12) |
| C41 | C36 | C35 | 119.3(9)  | C90  | C91 | H91  | 120.6     |
| C37 | C36 | C35 | 123.9(8)  | C92  | C91 | H91  | 120.6     |
| C38 | C37 | C36 | 122.2(10) | C93  | C92 | C91  | 118.2(12) |
| C38 | C37 | H37 | 118.9     | C93  | C92 | H92  | 120.9     |
| C36 | C37 | H37 | 118.9     | C91  | C92 | H92  | 120.9     |
| C37 | C38 | C39 | 120.3(11) | C94  | C93 | C92  | 122.6(12) |
| C37 | C38 | H38 | 119.9     | C94  | C93 | H93  | 118.7     |
| C39 | C38 | H38 | 119.9     | C92  | C93 | H93  | 118.7     |

|     |     |     |           |      |      |      |           |
|-----|-----|-----|-----------|------|------|------|-----------|
| C40 | C39 | C38 | 119.0(10) | C93  | C94  | C89  | 120.2(11) |
| C40 | C39 | H39 | 120.5     | C93  | C94  | H94  | 119.9     |
| C38 | C39 | H39 | 120.5     | C89  | C94  | H94  | 119.9     |
| C41 | C40 | C39 | 120.2(9)  | C96  | C95  | C100 | 117.1(10) |
| C41 | C40 | H40 | 119.9     | C96  | C95  | C88  | 124.1(10) |
| C39 | C40 | H40 | 119.9     | C100 | C95  | C88  | 118.7(10) |
| C40 | C41 | C36 | 121.6(10) | C95  | C96  | C97  | 120.6(12) |
| C40 | C41 | H41 | 119.2     | C95  | C96  | H96  | 119.7     |
| C36 | C41 | H41 | 119.2     | C97  | C96  | H96  | 119.7     |
| C47 | C42 | C43 | 118.9(10) | C98  | C97  | C96  | 121.0(12) |
| C47 | C42 | C35 | 118.4(10) | C98  | C97  | H97  | 119.5     |
| C43 | C42 | C35 | 122.7(9)  | C96  | C97  | H97  | 119.5     |
| C42 | C43 | C44 | 119.9(10) | C97  | C98  | C99  | 119.4(12) |
| C42 | C43 | H43 | 120.0     | C97  | C98  | H98  | 120.3     |
| C44 | C43 | H43 | 120.0     | C99  | C98  | H98  | 120.3     |
| C45 | C44 | C43 | 121.4(11) | C100 | C99  | C98  | 119.3(12) |
| C45 | C44 | H44 | 119.3     | C100 | C99  | H99  | 120.4     |
| C43 | C44 | H44 | 119.3     | C98  | C99  | H99  | 120.4     |
| C44 | C45 | C46 | 118.6(11) | C99  | C100 | C95  | 122.5(11) |
| C44 | C45 | H45 | 120.7     | C99  | C100 | H100 | 118.7     |
| C46 | C45 | H45 | 120.7     | C95  | C100 | H100 | 118.7     |
| C47 | C46 | C45 | 119.3(11) | C102 | C101 | C106 | 117.9(9)  |
| C47 | C46 | H46 | 120.3     | C102 | C101 | C88  | 122.8(9)  |
| C45 | C46 | H46 | 120.3     | C106 | C101 | C88  | 119.0(9)  |
| C42 | C47 | C46 | 121.7(11) | C101 | C102 | C103 | 121.3(10) |
| C42 | C47 | H47 | 119.1     | C101 | C102 | H102 | 119.4     |
| C46 | C47 | H47 | 119.1     | C103 | C102 | H102 | 119.4     |
| C53 | C48 | C49 | 118.1(10) | C104 | C103 | C102 | 120.9(11) |
| C53 | C48 | C35 | 122.6(10) | C104 | C103 | H103 | 119.5     |

|      |      |      |           |      |      |       |           |
|------|------|------|-----------|------|------|-------|-----------|
| C49  | C48  | C35  | 119.3(9)  | C102 | C103 | H103  | 119.5     |
| C48  | C49  | C50  | 121.3(10) | C103 | C104 | C105  | 118.5(10) |
| C48  | C49  | H49  | 119.4     | C103 | C104 | H104  | 120.7     |
| C50  | C49  | H49  | 119.4     | C105 | C104 | H104  | 120.7     |
| C51  | C50  | C49  | 120.7(11) | C106 | C105 | C104  | 120.3(10) |
| C51  | C50  | H50  | 119.6     | C106 | C105 | H105  | 119.8     |
| C49  | C50  | H50  | 119.6     | C104 | C105 | H105  | 119.8     |
| C50  | C51  | C52  | 119.7(10) | C105 | C106 | C101  | 121.0(10) |
| C50  | C51  | H51  | 120.2     | C105 | C106 | H106  | 119.5     |
| C52  | C51  | H51  | 120.2     | C101 | C106 | H106  | 119.5     |
| C51  | C52  | C53  | 119.5(10) | N6   | C112 | C113  | 120.8(12) |
| C51  | C52  | H52  | 120.3     | N6   | C112 | H112  | 119.6     |
| C53  | C52  | H52  | 120.3     | C113 | C112 | H112  | 119.6     |
| C48  | C53  | C52  | 120.6(11) | C114 | C113 | C112  | 119.9(12) |
| C48  | C53  | H53  | 119.7     | C114 | C113 | Br6   | 122.7(10) |
| C52  | C53  | H53  | 119.7     | C112 | C113 | Br6   | 117.4(10) |
| C108 | C107 | N3   | 121.7(10) | C115 | C114 | C113  | 117.6(13) |
| C108 | C107 | H107 | 119.2     | C115 | C114 | H114  | 121.2     |
| N3   | C107 | H107 | 119.2     | C113 | C114 | H114  | 121.2     |
| C107 | C108 | C109 | 121.6(11) | C114 | C115 | C116  | 120.9(13) |
| C107 | C108 | Br3  | 118.6(9)  | C114 | C115 | H115  | 119.6     |
| C109 | C108 | Br3  | 119.8(9)  | C116 | C115 | H115  | 119.6     |
| C108 | C109 | C110 | 117.2(12) | N6   | C116 | C115  | 120.7(12) |
| C108 | C109 | H109 | 121.4     | N6   | C116 | H116  | 119.6     |
| C110 | C109 | H109 | 121.4     | C115 | C116 | H116  | 119.6     |
| C111 | C110 | C109 | 119.4(11) | C12  | C117 | C11   | 109.3(11) |
| C111 | C110 | H110 | 120.3     | C12  | C117 | H11'  | 109.8     |
| C109 | C110 | H110 | 120.3     | C11  | C117 | H11'  | 109.8     |
| C110 | C111 | N3   | 123.3(11) | C12  | C117 | H11'' | 109.8     |

|      |      |      |           |      |      |      |           |
|------|------|------|-----------|------|------|------|-----------|
| C110 | C111 | H111 | 118.4     | Cl1  | C117 | H11" | 109.8     |
| N3   | C111 | H111 | 118.4     | H11' | C117 | H11" | 108.3     |
| C54  | Pd2  | N6   | 178.0(4)  | Cl4  | C118 | Cl3  | 116.3(12) |
| C54  | Pd2  | Br5  | 87.9(3)   | Cl4  | C118 | H18" | 108.2     |
| N6   | Pd2  | Br5  | 91.6(3)   | Cl3  | C118 | H18" | 108.2     |
| C54  | Pd2  | Br4  | 87.7(3)   | Cl4  | C118 | H18' | 108.2     |
| N6   | Pd2  | Br4  | 92.9(3)   | Cl3  | C118 | H18' | 108.2     |
| Br5  | Pd2  | Br4  | 175.30(6) | H18" | C118 | H18' | 107.4     |

**Table S27.** Torsion Angles for Complex 7.

| A   | B  | C  | D   | Angle/°    | A   | B   | C   | D   | Angle/°   |
|-----|----|----|-----|------------|-----|-----|-----|-----|-----------|
| C2  | N1 | C1 | N2  | 0.5(12)    | C57 | N4  | C54 | N5  | -178.8(9) |
| C4  | N1 | C1 | N2  | -178.0(9)  | C56 | N4  | C54 | Pd2 | -179.5(8) |
| C2  | N1 | C1 | Pd1 | 179.3(8)   | C57 | N4  | C54 | Pd2 | 3.6(16)   |
| C4  | N1 | C1 | Pd1 | 0.8(15)    | C55 | N5  | C54 | N4  | 2.0(11)   |
| C3  | N2 | C1 | N1  | 0.0(12)    | C82 | N5  | C54 | N4  | -178.8(9) |
| C29 | N2 | C1 | N1  | 177.5(9)   | C55 | N5  | C54 | Pd2 | 179.8(8)  |
| C3  | N2 | C1 | Pd1 | -178.8(8)  | C82 | N5  | C54 | Pd2 | -1.1(14)  |
| C29 | N2 | C1 | Pd1 | -1.3(15)   | C54 | N5  | C55 | C56 | -1.5(12)  |
| C1  | N1 | C2 | C3  | -0.9(13)   | C82 | N5  | C55 | C56 | 179.4(10) |
| C4  | N1 | C2 | C3  | 177.6(10)  | N5  | C55 | C56 | N4  | 0.3(12)   |
| N1  | C2 | C3 | N2  | 0.8(12)    | C54 | N4  | C56 | C55 | 1.0(13)   |
| C1  | N2 | C3 | C2  | -0.5(12)   | C57 | N4  | C56 | C55 | 178.0(9)  |
| C29 | N2 | C3 | C2  | -177.9(10) | C54 | N4  | C57 | C58 | 132.6(11) |
| C1  | N1 | C4 | C5  | -115.7(12) | C56 | N4  | C57 | C58 | -44.0(14) |
| C2  | N1 | C4 | C5  | 66.1(15)   | C54 | N4  | C57 | C62 | -46.1(15) |
| C1  | N1 | C4 | C9  | 60.9(15)   | C56 | N4  | C57 | C62 | 137.3(11) |
| C2  | N1 | C4 | C9  | -117.3(12) | C62 | C57 | C58 | C59 | 0.3(15)   |
| C9  | C4 | C5 | C6  | 2.8(17)    | N4  | C57 | C58 | C59 | -178.5(9) |

|     |     |     |     |            |     |     |     |     |            |
|-----|-----|-----|-----|------------|-----|-----|-----|-----|------------|
| N1  | C4  | C5  | C6  | 179.4(10)  | C57 | C58 | C59 | C60 | -0.1(15)   |
| C4  | C5  | C6  | C7  | -2.3(17)   | C58 | C59 | C60 | C61 | 0.4(15)    |
| C5  | C6  | C7  | C8  | 0.5(17)    | C58 | C59 | C60 | C63 | 176.3(9)   |
| C5  | C6  | C7  | C10 | 178.3(10)  | C59 | C60 | C61 | C62 | -0.8(16)   |
| C6  | C7  | C8  | C9  | 0.9(16)    | C63 | C60 | C61 | C62 | -177.0(9)  |
| C10 | C7  | C8  | C9  | -177.0(10) | C58 | C57 | C62 | C61 | -0.6(15)   |
| C5  | C4  | C9  | C8  | -1.5(16)   | N4  | C57 | C62 | C61 | 178.1(9)   |
| N1  | C4  | C9  | C8  | -178.0(9)  | C60 | C61 | C62 | C57 | 0.9(15)    |
| C7  | C8  | C9  | C4  | -0.4(16)   | C59 | C60 | C63 | C70 | 111.7(11)  |
| C8  | C7  | C10 | C23 | 70.8(12)   | C61 | C60 | C63 | C70 | -72.3(11)  |
| C6  | C7  | C10 | C23 | -107.0(12) | C59 | C60 | C63 | C76 | -125.5(10) |
| C8  | C7  | C10 | C11 | -171.8(9)  | C61 | C60 | C63 | C76 | 50.5(11)   |
| C6  | C7  | C10 | C11 | 10.4(15)   | C59 | C60 | C63 | C64 | -5.2(13)   |
| C8  | C7  | C10 | C17 | -50.9(12)  | C61 | C60 | C63 | C64 | 170.8(9)   |
| C6  | C7  | C10 | C17 | 131.4(11)  | C70 | C63 | C64 | C65 | 126.9(10)  |
| C23 | C10 | C11 | C16 | 51.6(11)   | C76 | C63 | C64 | C65 | 3.7(13)    |
| C7  | C10 | C11 | C16 | -69.1(11)  | C60 | C63 | C64 | C65 | -112.9(10) |
| C17 | C10 | C11 | C16 | 172.1(8)   | C70 | C63 | C64 | C69 | -49.5(11)  |
| C23 | C10 | C11 | C12 | -125.2(10) | C76 | C63 | C64 | C69 | -172.7(8)  |
| C7  | C10 | C11 | C12 | 114.1(11)  | C60 | C63 | C64 | C69 | 70.7(10)   |
| C17 | C10 | C11 | C12 | -4.7(13)   | C69 | C64 | C65 | C66 | -1.5(15)   |
| C16 | C11 | C12 | C13 | 1.3(15)    | C63 | C64 | C65 | C66 | -178.0(9)  |
| C10 | C11 | C12 | C13 | 178.2(9)   | C64 | C65 | C66 | C67 | -1.4(17)   |
| C11 | C12 | C13 | C14 | 1.7(16)    | C65 | C66 | C67 | C68 | 2.6(16)    |
| C12 | C13 | C14 | C15 | -3.8(16)   | C66 | C67 | C68 | C69 | -0.9(16)   |
| C13 | C14 | C15 | C16 | 3.0(16)    | C67 | C68 | C69 | C64 | -2.1(15)   |
| C14 | C15 | C16 | C11 | 0.0(15)    | C65 | C64 | C69 | C68 | 3.2(14)    |
| C12 | C11 | C16 | C15 | -2.2(14)   | C63 | C64 | C69 | C68 | 179.9(9)   |
| C10 | C11 | C16 | C15 | -179.3(9)  | C76 | C63 | C70 | C75 | -109.1(1)  |

|     |     |     |     |            |     |     |     |     |            |
|-----|-----|-----|-----|------------|-----|-----|-----|-----|------------|
| C23 | C10 | C17 | C22 | 6.4(14)    | C64 | C63 | C70 | C75 | 128.3(10)  |
| C11 | C10 | C17 | C22 | -110.6(11) | C60 | C63 | C70 | C75 | 9.8(14)    |
| C7  | C10 | C17 | C22 | 127.9(11)  | C76 | C63 | C70 | C71 | 70.9(12)   |
| C23 | C10 | C17 | C18 | -175.9(9)  | C64 | C63 | C70 | C71 | -51.6(12)  |
| C11 | C10 | C17 | C18 | 67.1(11)   | C60 | C63 | C70 | C71 | -170.1(9)  |
| C7  | C10 | C17 | C18 | -54.5(12)  | C75 | C70 | C71 | C72 | 0.5(16)    |
| C22 | C17 | C18 | C19 | 3.5(16)    | C63 | C70 | C71 | C72 | -179.5(9)  |
| C10 | C17 | C18 | C19 | -174.3(10) | C70 | C71 | C72 | C73 | -1.5(16)   |
| C17 | C18 | C19 | C20 | -0.6(18)   | C71 | C72 | C73 | C74 | 1.7(16)    |
| C18 | C19 | C20 | C21 | -2.6(19)   | C72 | C73 | C74 | C75 | -1.0(16)   |
| C19 | C20 | C21 | C22 | 2.8(18)    | C71 | C70 | C75 | C74 | 0.2(16)    |
| C20 | C21 | C22 | C17 | 0.2(17)    | C63 | C70 | C75 | C74 | -179.7(10) |
| C18 | C17 | C22 | C21 | -3.4(16)   | C73 | C74 | C75 | C70 | 0.0(16)    |
| C10 | C17 | C22 | C21 | 174.3(10)  | C70 | C63 | C76 | C81 | -9.1(13)   |
| C11 | C10 | C23 | C28 | 52.6(12)   | C64 | C63 | C76 | C81 | 110.3(11)  |
| C7  | C10 | C23 | C28 | 173.6(9)   | C60 | C63 | C76 | C81 | -131.3(10) |
| C17 | C10 | C23 | C28 | -67.4(12)  | C70 | C63 | C76 | C77 | 167.4(9)   |
| C11 | C10 | C23 | C24 | -121.1(10) | C64 | C63 | C76 | C77 | -73.1(11)  |
| C7  | C10 | C23 | C24 | -0.1(14)   | C60 | C63 | C76 | C77 | 45.3(12)   |
| C17 | C10 | C23 | C24 | 118.9(11)  | C81 | C76 | C77 | C78 | -0.6(16)   |
| C28 | C23 | C24 | C25 | -0.7(15)   | C63 | C76 | C77 | C78 | -177.3(10) |
| C10 | C23 | C24 | C25 | 173.2(10)  | C76 | C77 | C78 | C79 | 2.0(17)    |
| C23 | C24 | C25 | C26 | 1.6(17)    | C77 | C78 | C79 | C80 | -1.4(17)   |
| C24 | C25 | C26 | C27 | -0.3(18)   | C78 | C79 | C80 | C81 | -0.7(17)   |
| C25 | C26 | C27 | C28 | -1.8(18)   | C77 | C76 | C81 | C80 | -1.4(15)   |
| C26 | C27 | C28 | C23 | 2.8(18)    | C63 | C76 | C81 | C80 | 175.2(9)   |
| C24 | C23 | C28 | C27 | -1.4(16)   | C79 | C80 | C81 | C76 | 2.1(16)    |
| C10 | C23 | C28 | C27 | -175.6(10) | C54 | N5  | C82 | C87 | 115.6(12)  |
| C3  | N2  | C29 | C30 | 41.6(16)   | C55 | N5  | C82 | C87 | -65.4(15)  |



|     |     |     |     |            |      |     |     |      |           |
|-----|-----|-----|-----|------------|------|-----|-----|------|-----------|
| C1  | N2  | C29 | C30 | -135.4(11) | C54  | N5  | C82 | C83  | -64.8(14) |
| C3  | N2  | C29 | C34 | -136.0(12) | C55  | N5  | C82 | C83  | 114.1(12) |
| C1  | N2  | C29 | C34 | 47.0(15)   | C87  | C82 | C83 | C84  | -1.9(18)  |
| C34 | C29 | C30 | C31 | -4.3(17)   | N5   | C82 | C83 | C84  | 178.5(10) |
| N2  | C29 | C30 | C31 | 178.1(10)  | C82  | C83 | C84 | C85  | 1.1(18)   |
| C29 | C30 | C31 | C32 | 1.0(16)    | C83  | C84 | C85 | C86  | 0.3(17)   |
| C30 | C31 | C32 | C33 | 1.1(16)    | C83  | C84 | C85 | C88  | 179.1(11) |
| C30 | C31 | C32 | C35 | -173.7(10) | C84  | C85 | C86 | C87  | -0.9(17)  |
| C31 | C32 | C33 | C34 | 0.1(17)    | C88  | C85 | C86 | C87  | -179.6(1) |
| C35 | C32 | C33 | C34 | 175.0(10)  | C83  | C82 | C87 | C86  | 1.4(17)   |
| C30 | C29 | C34 | C33 | 5.4(17)    | N5   | C82 | C87 | C86  | -179.1(1) |
| N2  | C29 | C34 | C33 | -177.1(10) | C85  | C86 | C87 | C82  | 0.1(18)   |
| C32 | C33 | C34 | C29 | -3.2(17)   | C86  | C85 | C88 | C95  | -7.5(15)  |
| C33 | C32 | C35 | C48 | -171.7(10) | C84  | C85 | C88 | C95  | 173.8(9)  |
| C31 | C32 | C35 | C48 | 2.9(14)    | C86  | C85 | C88 | C101 | 108.9(12) |
| C33 | C32 | C35 | C36 | 69.6(12)   | C84  | C85 | C88 | C101 | -69.8(12) |
| C31 | C32 | C35 | C36 | -115.8(11) | C86  | C85 | C88 | C89  | -129.9(1) |
| C33 | C32 | C35 | C42 | -51.6(12)  | C84  | C85 | C88 | C89  | 51.4(12)  |
| C31 | C32 | C35 | C42 | 123.0(11)  | C85  | C88 | C89 | C94  | -115.7(1) |
| C32 | C35 | C36 | C41 | 170.9(9)   | C95  | C88 | C89 | C94  | 122.3(11) |
| C48 | C35 | C36 | C41 | 48.6(12)   | C101 | C88 | C89 | C94  | 4.5(14)   |
| C42 | C35 | C36 | C41 | -72.5(11)  | C85  | C88 | C89 | C90  | 57.5(13)  |
| C32 | C35 | C36 | C37 | -5.4(14)   | C95  | C88 | C89 | C90  | -64.5(13) |
| C48 | C35 | C36 | C37 | -127.7(10) | C101 | C88 | C89 | C90  | 177.8(10) |
| C42 | C35 | C36 | C37 | 111.2(11)  | C94  | C89 | C90 | C91  | -3.9(19)  |
| C41 | C36 | C37 | C38 | 1.6(16)    | C88  | C89 | C90 | C91  | -177.7(1) |
| C35 | C36 | C37 | C38 | 177.9(10)  | C89  | C90 | C91 | C92  | 5(2)      |
| C36 | C37 | C38 | C39 | -1.7(17)   | C90  | C91 | C92 | C93  | -3(2)     |
| C37 | C38 | C39 | C40 | 0.4(17)    | C91  | C92 | C93 | C94  | -1(2)     |

|     |     |     |     |            |      |      |      |      |           |
|-----|-----|-----|-----|------------|------|------|------|------|-----------|
| C38 | C39 | C40 | C41 | 1.1(17)    | C92  | C93  | C94  | C89  | 2.2(19)   |
| C39 | C40 | C41 | C36 | -1.2(17)   | C90  | C89  | C94  | C93  | 0.1(16)   |
| C37 | C36 | C41 | C40 | -0.1(16)   | C88  | C89  | C94  | C93  | 173.6(11) |
| C35 | C36 | C41 | C40 | -176.6(10) | C85  | C88  | C95  | C96  | -117.6(1) |
| C32 | C35 | C42 | C47 | -45.2(12)  | C101 | C88  | C95  | C96  | 122.1(10) |
| C48 | C35 | C42 | C47 | 76.1(11)   | C89  | C88  | C95  | C96  | -0.1(14)  |
| C36 | C35 | C42 | C47 | -165.4(9)  | C85  | C88  | C95  | C100 | 66.7(12)  |
| C32 | C35 | C42 | C43 | 135.6(10)  | C101 | C88  | C95  | C100 | -53.6(11) |
| C48 | C35 | C42 | C43 | -103.1(11) | C89  | C88  | C95  | C100 | -175.8(9) |
| C36 | C35 | C42 | C43 | 15.4(13)   | C100 | C95  | C96  | C97  | -2.9(15)  |
| C47 | C42 | C43 | C44 | 0.0(16)    | C88  | C95  | C96  | C97  | -178.6(1) |
| C35 | C42 | C43 | C44 | 179.2(10)  | C95  | C96  | C97  | C98  | 2.2(17)   |
| C42 | C43 | C44 | C45 | 2.2(18)    | C96  | C97  | C98  | C99  | -1.0(17)  |
| C43 | C44 | C45 | C46 | -2.1(19)   | C97  | C98  | C99  | C100 | 0.7(17)   |
| C44 | C45 | C46 | C47 | -0.2(19)   | C98  | C99  | C100 | C95  | -1.5(17)  |
| C43 | C42 | C47 | C46 | -2.3(17)   | C96  | C95  | C100 | C99  | 2.5(16)   |
| C35 | C42 | C47 | C46 | 178.5(10)  | C88  | C95  | C100 | C99  | 178.5(10) |
| C45 | C46 | C47 | C42 | 2.4(18)    | C85  | C88  | C101 | C102 | -5.3(14)  |
| C32 | C35 | C48 | C53 | 116.9(11)  | C95  | C88  | C101 | C102 | 115.8(11) |
| C36 | C35 | C48 | C53 | -121.8(10) | C89  | C88  | C101 | C102 | -121.6(1) |
| C42 | C35 | C48 | C53 | 0.3(13)    | C85  | C88  | C101 | C106 | -178.3(9) |
| C32 | C35 | C48 | C49 | -66.2(12)  | C95  | C88  | C101 | C106 | -57.2(12) |
| C36 | C35 | C48 | C49 | 55.1(11)   | C89  | C88  | C101 | C106 | 65.3(12)  |
| C42 | C35 | C48 | C49 | 177.2(9)   | C106 | C101 | C102 | C103 | 0.8(16)   |
| C53 | C48 | C49 | C50 | -3.4(15)   | C88  | C101 | C102 | C103 | -172.3(1) |
| C35 | C48 | C49 | C50 | 179.6(9)   | C101 | C102 | C103 | C104 | 1.1(18)   |
| C48 | C49 | C50 | C51 | 2.2(16)    | C102 | C103 | C104 | C105 | -2.0(18)  |
| C49 | C50 | C51 | C52 | 1.5(16)    | C103 | C104 | C105 | C106 | 1.0(17)   |
| C50 | C51 | C52 | C53 | -3.8(16)   | C104 | C105 | C106 | C101 | 1.0(17)   |

|      |      |      |      |           |      |      |      |      |           |
|------|------|------|------|-----------|------|------|------|------|-----------|
| C49  | C48  | C53  | C52  | 1.0(15)   | C102 | C101 | C106 | C105 | -1.9(16)  |
| C35  | C48  | C53  | C52  | 178.0(9)  | C88  | C101 | C106 | C105 | 171.5(10) |
| C51  | C52  | C53  | C48  | 2.5(15)   | C116 | N6   | C112 | C113 | 0.6(18)   |
| C111 | N3   | C107 | C108 | -0.6(16)  | Pd2  | N6   | C112 | C113 | -178.9(9) |
| Pd1  | N3   | C107 | C108 | 177.7(8)  | N6   | C112 | C113 | C114 | -0.1(19)  |
| N3   | C107 | C108 | C109 | 0.5(18)   | N6   | C112 | C113 | Br6  | -178.4(9) |
| N3   | C107 | C108 | Br3  | -179.0(8) | C112 | C113 | C114 | C115 | -1.3(19)  |
| C107 | C108 | C109 | C110 | -1.3(18)  | Br6  | C113 | C114 | C115 | 177.0(10) |
| Br3  | C108 | C109 | C110 | 178.2(9)  | C113 | C114 | C115 | C116 | 2(2)      |
| C108 | C109 | C110 | C111 | 2.3(18)   | C112 | N6   | C116 | C115 | 0.2(19)   |
| C109 | C110 | C111 | N3   | -2.6(19)  | Pd2  | N6   | C116 | C115 | 179.8(9)  |

**Table S28.** Hydrogen Atom Coordinates ( $\text{\AA}\times 10^4$ ) and Isotropic Displacement Parameters ( $\text{\AA}^2\times 10^3$ ) for Complex 7.

| Atom | <i>x</i> | <i>y</i> | <i>z</i> | U(eq) |
|------|----------|----------|----------|-------|
| H2   | 5095     | 3046     | -144     | 16    |
| H3   | 3738     | 3038     | 986      | 20    |
| H5   | 8389     | 3031     | -68      | 16    |
| H6   | 10011    | 2864     | -929     | 16    |
| H8   | 8399     | 1672     | -1109    | 16    |
| H9   | 6706     | 1842     | -287     | 16    |
| H12  | 13440    | 2135     | -1325    | 18    |
| H13  | 15093    | 2663     | -1516    | 20    |
| H14  | 14277    | 3330     | -2014    | 20    |
| H15  | 11784    | 3419     | -2447    | 18    |
| H16  | 10135    | 2889     | -2287    | 15    |
| H18  | 11835    | 1912     | -327     | 26    |
| H19  | 13141    | 1304     | 108      | 31    |
| H20  | 13333    | 729      | 699      | 32    |
